# Supplementary material for: Closing an Open Balance: the Impact of Increased Roundwood Harvest on Forest Carbon
Source: Preprints.org preprint supplement (doi:10.20944/preprints202203.0198.v1), 2022-03-15
Supplement: Supplementary file 4 [file supplementary]

## Sheet: Title
Supplementary material - Closing an open balance: the impact of increased roundwood harvest on forest carbon
Sampo Soimakallio (Finnish Environment Institute)*)
Hannes Böttcher (Oeko-Institut)
Jari Niemi (Finnish Environment Institute)
Fredric Mosley (European Forest Institute)
Sara Turunen (Tapio Ltd)
Klaus Josef Hennenberg (Oeko-Institut)
Judith Reise (Oeko-Institut)
Horst Fehrenbach (ifeu)
*) Correspondence should be addressed to this author. E-mail: sampo.soimakallio@syke.fi

## Sheet: All articles
Qualification	Title	Authors	Year	Abstract	Scenarios	Number of scenarios	Time period	Country / location	Journal/type of publication
No access	9 Hydrological Modelling in Forested Systems	HE Golden, GR Evenson, S Tian…	2016						?Book: Forest Hydrology Processes, Management and Assessment
	A carbon accounting tool for complex and uncertain greenhouse gas emission life cycles	JB Pichancourt, R Manso, F Ningre, M Fortin	2018	Software applications for life cycle assessment of greenhouse gas (GHG) emissions have become popular over the last decade. Their objective is to provide insight into how GHG emissions could be reduced in the sectors defined by the UNFCCC. However, boundaries between these sectors are not closed and current tools are not designed to represent this complexity or to assess the numerous sources of u…					Environmental Modelling & Software
	A climate-sensitive forest model for assessing impacts of forest management in Europe	S Härkönen, M Neumann, V Mues, F Berninger…	2019	FORMIT-M is a widely applicable, open-access, simple and flexible, climate-sensitive forest management simulator requiring only standard forest inventory data as input. It combines a process-based carbon balance approach with a strong inventory-based empirical component. The model has been linked to the global forest sector model EFI-GTM to secure consistency between timber cutting and demand, al…					Environmental Modelling & Software
	A comparison of simulated and field-derived leaf area index (LAI) and canopy height values from four forest complexes in the southeastern USA	JS Iiames, E Cooter, D Schwede, J Williams	2018	Vegetative leaf area is a critical input to models that simulate human and ecosystem exposure to atmospheric pollutants. Leaf area index (LAI) can be measured in the field or numerically simulated, but all contain some inherent uncertainty that is passed to the exposure assessments that use them. LAI estimates for minimally managed or natural forest stands can be particularly difficult to develop…					Forests
	A conceptual model for forest naturalness assessment and application in Quebec's Boreal Forest	S Côté, L Bélanger, R Beauregard, É Thiffault, M Margni	2019	Research Highlights: To inform eco-designers in green building conception, we propose a conceptual model for the assessment of the impact of using wood on the quality of ecosystems. Background and Objectives: The proposed model allows the assessment of the quality of ecosystems at the landscape level based on the condition of the forest and the proportion of different practices to characterize pr…					Forests
	A Decision Support System for trade-off analysis and dynamic evaluation of forest ecosystem services	S Sacchelli	2018	This paper presents an open-source Decision Support System (DSS) able to quantify the economic value of forest ecosystem services and their dynamic trade-offs. Provisioning, regulation and support services, as well as cultural services, can be evaluated by the model. Best management forestry practices can be identified by optimizing specific objective functions, e.g., maximizing the economic valu…					iForest - Biogeosciences and Forestry
	A GIS approach to sustainable livestock planning from carbon dynamics analysis: case study of a cattle ranch in Serra da Mantiqueira (Brazil)	ADA Oliveira	2020	The assessment of carbon dynamics as indicator of climate-regulation ecosystem services (ES) through the modeling of different scenarios on land use and land cover (LULC) changes is widely used in environmental conservation studies to support the decision-making process regarding public policies. However, studies at local scales that address the subject under the farm property perspective, throug…					?Master's thesis?
	A mid‐century ecological forecast with partitioned uncertainty predicts increases in loblolly pine forest productivity	RQ Thomas, AL Jersild, EB Brooks, VA Thomas, RH Wynne	2018	Ecological forecasting of forest productivity involves integrating observations into a process‐based model and propagating the dominant components of uncertainty to generate probability distributions for future states and fluxes. Here, we develop a forecast for the biomass change in loblolly pine (Pinus taeda ) forests of the southeastern United States and evaluate the relative contribution of di…					Ecological Applications
	A review of modeling approaches for ecosystem services assessment in the Asian region	K Shoyama, C Kamiyama, J Morimoto, M Ooba, T Okuro	2017	The use of various modeling approaches is critical in the assessment of ecosystem services. Although numerous assessments have been conducted as scholarly studies to quantify, map, and value ecosystem services, a well-structured platform is necessary to ensure consistency of the assessment approaches with regard to theories and practices. To identify gaps between practical ecosystem services asse…					Ecosystem Services
	A review of the effects of forest management intensity on ecosystem services for northern European temperate forests with a focus on the UK	L Sing, MJ Metzger, JS Paterson, D Ray	2017	Ecosystem services (ES) are the benefits that people receive from ecosystems. Understanding the impact of forest management on their supply can inform policy and practice for meeting societal demand. The objectives of this paper are to identify and review the effect of management intensity on priority ES supply and identify synergies and trade-offs among ES of different management approaches. We …					Forestry: An International Journal of Forest Research
	A service-dominant perspective on payments for ecosystem service offerings	B Matthies	2016	The ecosystem service (ES) approach is a means of evaluating service value flows from ecosystems to humans for their well-being. The approach suggests that ecosystem functions are divided into categories according to the benefits derived and utilized by beneficiaries. The ES approach has become a tool for public and private decision-makers, driven by the need to more accurately incorporate enviro…					?Dissertation
2nd round	A simple grid-based framework for simulating forest structural trajectories linked to transient forest management scenarios in Fennoscandia	T Majasalmi, M Allen, C Antón-Fernández, R Astrup, RM Bright	2020	Forest structural properties largely govern surface fluxes of moisture, energy, and momentum that strongly affect regional climate and hydrology. Forest structural properties are greatly shaped by forest management activities, especially in the Fennoscandia (Norway, Sweden, and Finland). Insight into transient developments in forest structure in response to management intervention is therefore es…	Yes	5	2015-2100	Norway	Climatic Change
	A simulation-based approach to assess forest policy options under biotic and abiotic climate change impacts: A case study on Scotland's National Forest Estate	D Ray, M Petr, M Mullett, S Bathgate, M Marchi, K Beauchamp	2019	The future provision of forest goods and ecosystem services is dependent, among other factors, on climate change impacts, forest management, and response to forest policies. To assess policy implementation targets for Scotland's National Forest Estate under climate change, we simulated forest growth through the 21st century - with and without the abiotic impacts of climate change, and with and wi…					Forest Policy and Economics
	A spatial-based tool for the analysis of payments for forest ecosystem services related to hydrogeological protection	G Grilli, R Fratini, E Marone, S Sacchelli	2020	This paper presents a decision support based on spatial analysis for the evaluation of payments for forest ecosystem services (PES). A focus on the payment range for protective services for shallow landslide is described. The maximum willingness to pay by real estate owners and the minimum willingness to accept by forest owners are computed. The model quantifies the economic risk of real estate d…					Forest Policy and Economics
2nd round	A systems approach to assess climate change mitigation options in landscapes of the United States forest sector	AJ Dugan, R Birdsey, VS Mascorro, M Magnan, CE Smyth, M Olguin, WA Kurz	2018	Background United States forests can contribute to national strategies for greenhouse gas reductions. The objective of this work was to evaluate forest sector climate change mitigation scenarios from 2018 to 2050 by applying a systems-based approach that accounts for net emissions across four interdependent components: (1) forest ecosystem, (2) land-use change, (3) harvested wood products, and (4…	Yes	8	32 years, 2018-2050	Two case studies in the U.S.: coastal South Caroline and Northern Wisconsin	Carbon Balance and Management
	Abandoned forest ecosystem: Implications for Japan's Oak Wilt disease	K Imamura, S Managi, S Saito, T Nakashizuka	2017	This study determined values for the ecosystem services of abandoned coppice forests that are threatened by a forest disease known as Japanese Oak Wilt. We applied a discrete choice experiment to value these ecosystem services. The results indicated that ecosystem services were highly valued in the order of biodiversity conservation, water and soil regulation, timber provision, and climate change…					Journal of Forest Economics
	Accounting for biodiversity in life cycle impact assessments of forestry and agricultural systems—the BioImpact metric	PAM Turner, FA Ximenes, TD Penman, BS Law, CM Waters, T Grant, M Mo, PM Brock	2019	Purpose: Life cycle assessment (LCA) is a useful method for assessing environmental impacts at large scales. Biodiversity and ecosystem diversity are site-specific, often complex, and difficult to generalise within an LCA framework. There is currently no globally acceptable means of assessing biodiversity within the LCA framework. We introduce, test and revise BioImpact, a method for incorporatin…					The International Journal of Live Cycle Assessment
	Advances in Modeling Natural Resource Management under Uncertainty: Forest Mortality, Policy Design, and the Value of Information	MR Sloggy	2018	Advancing the understanding of natural resource management is an important step in mitigating the effects of human activity on the environment, and ensuring efficient outcomes for many sectors of the economy. As humanity’s role in the natural world becomes better understood, the importance of interdisciplinary modeling has grown in leaps and bounds. This is evidenced by the rise of fields such as…					?Dissertation
	Advancing the relationship between renewable energy and ecosystem services for landscape planning and design: A literature review	P Picchi, M van Lierop, D Geneletti, S Stremke	2019	The transition to a low carbon future is starting to affect landscapes around the world. In order for this landscape transformation to be sustainable, renewable energy technologies should not cause critical trade-offs between the provision of energy and that of other ecosystem services such as food production. This literature review advances the body of knowledge on sustainable energy transition …					Ecosystem Services
	Agent-based modelling and simulation applied to environmental management	C Le Page, D Bazile, N Becu, P Bommel…	2017	The purpose of this chapter is to summarize how agent-based modelling and simulation (ABMS) is being used in the area of environmental management. With the science of complex systems now being widely recognized as an appropriate one to tackle the main issues of ecological management, ABMS is emerging as one of the most promising approaches. To avoid any confusion and disbelief about the actual us…					Simulating Social Complexity
	Alternatives to carbon capture and storage (CCS) in the deep decarbonisation of the Norwegian cement industry: A cost-optimisation study of GHG mitigation …	O Vågerö	2020	Norway’s two cement manufacturing plants are both among the top 10 largest national point sources of Greenhouse Gas (GHG) emissions and together contribute to 2% of the total GHG emissions. One of the important measures being pushed for to mitigate these emissions is Carbon Capture and Storage (CCS), for which the Norwegian Government is to make an investment decision in 2020/2021. Norway may end…					?Master's Thesis?
	An analysis of potential investment returns of planted forests in South China	P Zhang, Y He, Y Feng, R De La Torre, H Jia, J Tang	2019	Financial returns of forest plantations are an important concern around the world. In this research, we focused on South China’s timber investments, collected data from the Pingxiang, Guangxi Province, China, which is the demonstration zone of Fast-growing and High-yielding Timber Plantation Base Construction Program and National Timber Strategic Storage and Production Bases Construction Program,…					New Forests
	An environmental-economic accounting of services provided by the living infrastructure in the ACT: public urban forests and irrigated open spaces	S Tapsuwan, R Marcos-Martinez, H Schandl	2019	The ACT Government commissioned CSIRO to undertake a pilot project to value two types of urban living infrastructure using the United Nation’s System of Environmental-Economic Accounting framework and quantifying the estimated whole-of-life contribution these assets make to Canberra.					?CSIRO Land&Water Final Report
	An inventory-based regeneration biomass model to initialize landscape scale simulation scenarios	W Poschenrieder, P Biber, H Pretzsch	2018	Dynamic landscape simulation of the forest requires an initial regeneration stock specific to the characteristics of each simulated stand. Forest inventories, however, are sparse with regard to regeneration. Moreover, statistical regeneration models are rare. We introduce an inventory-based statistical model type that (1) quantifies regeneration biomass as a fundamental regeneration attribute and…					Forests
2nd round	Analysing scenario approaches for forest management—One decade of experiences in Europe	MA Hoogstra-Klein, GM Hengeveld…	2017	In forest management, scenarios are often used to envision what the future might look like to account for uncertainties associated with, for example, climate change, changing socio-economic conditions, and technological developments. There are, however, many different methodological approaches to scenario building. In order to be able to make better use of the diversity of approaches at hand, a s…	Yes	Analysis of 129 scenarios	?	Europe	Forest Policy and Economics
	Analysis of relationships between ecosystem services: A generic classification and review of the literature	GO Ndong, O Therond, I Cousin	2020	The scientific literature contains many studies of trade-offs or synergies between ecosystem services (ES); however, it is challenging to qualify and compare these studies. To address this issue, we developed a structured generic methodological classification (typology) of studies that focuses on relationships between ES. The method focuses on characteristics of the spatial and temporal analyses …					Ecosystem Services
	Analyzing the effect of carbon prices on wood production and harvest scheduling in a managed forest in Turkey	H Zengin, ME Ünal	2019	Among terrestrial ecosystems, forests have the largest carbon deposits, and thus play an important role in global climate change. Forests of all ages and types have a significant capacity in sequestration or depositing carbon. Increasing their capacities from this aspect can only be possible through sustainably managed forests. Therefore, in order to increase the carbon stock in forests, carbon m…					Forest Policy and Economics
2nd round	Analyzing the effects of various forest management strategies and carbon prices on carbon dynamics in western Turkey	DM Kucuker	2019	Determining appropriate management strategies to reduce greenhouse gas emissions using optimization techniques to understand how forest management activities affect the carbon dynamics is critical in implementing effective carbon management policies. This paper quantitatively analyzes the long-term effects of different management policies and silvicultural interventions using linear programming. …	Yes	25	100 years	Korucu forest planning unit, Balıkesir province, Turkey	Journal of Environmental Management
	Assessing fossil fuel substitution through wood use based on long-term simulations	M Knauf, R Joosten, A Frühwald	2016	To fully analyze the forestry and wood products sector's impact on climate protection through the reduction of CO2 emissions, it is necessary to integrate all aspects of both carbon storage and the substitution effects of forestry and wood use. Substitution effects are assessed based on specific assumptions derived from life-cycle assessment studies, which for the purpose of comparison usually re…					Carbon Management
	Assessing pollinator habitat services to optimize conservation programs	R Iovanna, A Ando, S Swinton, J Kagan, D Hellerstein…	2017	Pollination services have received increased attention over the past several years, and protecting foraging area is beginning to be reflected in conservation policy. This case study considers the prospects for doing so in a more analytically rigorous manner, by quantifying the pollination services for sites being considered for ecological restoration. The specific policy context is the Conservati…					?The Council on Food, Agricultural & Resource Economics
	Assessing the forest-wood chain at local level: A Multi-Criteria Decision Analysis (MCDA) based on the circular bioeconomy principles	E Pieratti, A Paletto, I De Meo, C Fagarazzi, MGR Migliorini	2019	In the last years, the circular bioeconomy has been recognized as key approach to increase the competitiveness of enterprises and economic growth in the European Union (EU) member countries. In the circular bioeconomy context, forest-based sector can play a key role. The aim of the present study is to analyze the forest-wood chain at local level following the circular bioeconomy approach. In this…					Annals of Forest Research
	Assessing the INDCs' land use, land use change, and forest emission projections	N Forsell, O Turkovska, M Gusti, M Obersteiner, M den Elzen, P Havlik	2016	Background In preparation for the 2015 international climate negotiations in Paris, Parties submitted Intended Nationally Determined Contributions (INDCs) to the United Nations Framework Convention on Climate Change (UNFCCC) expressing each countries’ respective post-2020 climate actions. In this paper we assess individual Parties’ expected reduction of emissions/removals from land use, land use …					Carbon Balance and Management
	Assessing the protective role of alpine forests against rockfall at regional scale	C Scheidl, M Heiser, S Vospernik, E Lauss…	2020	Worldwide, mountain forests represent a significant factor in reducing rockfall risk over long periods of time on large potential disposition areas. While the economic value of technical protection measures against rockfall can be clearly determined and their benefits indicated, there is no general consensus on the quantification of the protective effect of forests. Experience shows that wherever…					European Journal of Forest Research
	Assessing the provisioning potential of ecosystem services in a Scandinavian boreal forest: suitability and tradeoff analyses on grid-based wall-to-wall forest inventory data	J Vauhkonen, R Ruotsalainen	2017	Determining optimal forest management to provide multiple goods and services, also referred to as Ecosystem Services (ESs), requires operational-scale information on the suitability of the forest for the provisioning of various ESs. Remote sensing allows wall-to-wall assessments and provides pixel data for a flexible composition of the management units. The purpose of this study was to incorporat…					Forest Ecology and Management
	Assessing transformation scenarios from pure Norway spruce to mixed uneven-aged forests in mountain areas	T Hilmers, P Biber, T Knoke, H Pretzsch	2020	Mixed mountain forests, primarily made up of Norway spruce (Picea abies (L.) Karst.), silver fir (Abies alba Mill.) and European beech (Fagus sylvatica L.), cover about 10 × 106 ha of submontane–subalpine altitudes in Europe. They provide invaluable ecosystem services, e.g. protection against avalanches, landslides or rockfall. However, pure Norway spruce stands have, since mediaeval times, been …					European Journal of Forest Research
	Assessment and optimization of sustainable forest wood supply chains–A systematic literature review	A Santos, A Carvalho, AP Barbosa-Póvoa, A Marques, P Amorim	2019	When it was first introduced, the concept of sustainability in the forestry sector had a narrow focus on sustainable wood production. Since then, this concept has evolved and it now considers now the three sustainability dimensions (economic, environmental and social) of the whole forest wood supply chain. The main objective of this study is then to review assessment and optimization studies that…					Forest Policy and Economics
2nd round	Assessment of Forest Biomass and Carbon Stocks at Stand Level Using Site-Specific Primary Data to Support Forest Management	L Nonini, C Schillaci, M Fiala	2020	To quantify and map woody biomass (WB) and forest carbon (C) stocks, several models were developed. They differ in terms of scale of application, details related to the input data required and outputs provided. Local Authorities, such as Mountain Communities, can be supported in sustainable forest planning and management by providing specific models in which the reference unit is the same as the …	?	?	?	Lombardy Region Northern Italy	Naresuan University Journals
	Assessment of risks to drinking water provision in Glitrevann from forest fertilization and harvesting	LA Jackson-Blake, F Clayer	2020	Forest fertilization is planned in the Glitre catchment, an important drinking water source for the Drammen region. In this report, we explore whether fertilization is likely to put drinking water provision in the catchment at risk over the short term, as well as longer-term risk associated with fertilization and forest harvesting. Overall, we find there is little risk of forest fertilization red…					?NIVA-rapport?
	Assessment of sustainability of forest management practices on the operational level in northwestern Russia–a case study from the Republic of Karelia	M Trishkin, E Lopatin, N Shmatkov, T Karjalainen	2017	The main aim of the article is to assess the consequences of newly proposed legislative initiative on introducing intensive forest management practices in Russia. Implementation of norms and its effect on sustainable forest management practices have been analysed in this study on one enterprise operating in the Republic of Karelia. This meant modelling of forest growth, clear cuts and regeneratio…					Scandinavian Journal of Forest Research
	Assessment of timber supply under alternative contextual scenarios	G Mozgeris, M Kavaliauskas, V Brukas	2019	Forest planners in former Eastern Block countries tend to provide conservative forecasts of timber supply, based on a rigid area control under the legislated rotation ages, and often assuming uniform forest management behaviour irrespective of the owner type. This study, in contrast, explores timber supply in a multi-disciplinary approach that analyses contextual factors and expands the space of …					Forest Policy and Economics
	Assessment of UAV photogrammetric DTM-independent variables for modelling and mapping forest structural indices in mixed temperate forests	F Giannetti, N Puletti, S Puliti, D Travaglini, G Chirici	2020	In the EU 2020 biodiversity strategy, maintaining and enhancing forest biodiversity is essential. Forest managers and technicians should include biodiversity monitoring as support for sustainible forest management and conservation issues, through the adoption of forest biodiversity indices. The present study investigates the potential of a new type of Structure from Motion (SfM) photogrammetry de…					Ecological Indicators
2nd round	Assessment on forest carbon sequestration in the Three-North Shelterbelt Program region, China	X Chu, J Zhan, Z Li, F Zhang, W Qi	2019	Forest ecosystems are a major component of the terrestrial ecosystems as they provide a variety of important ecosystem services, especially climate regulation via carbon sequestration. The Three-North Shelterbelt Program (TNSP), a pioneer for China's large-scale ecological construction, has promoted massive afforestation and forest dynamics since 1978. Quantitative analysis of carbon sequestratio…	?	?	1990-2015	China	Journal of Cleaner Production
	Background information in the Discussion sections of Forestry journals: A case study	R Joseph, JMH Lim	2018	The Discussion section constitutes a powerful closing argument used by a researcher to highlight key findings in relation to the existing knowledge with the aim of facilitating readers’ comprehension of the entire study. As previous research has yet to identify the frequencies of the different types of background information and the language resources used to present them, this study sought to id…					Journal of Language Studies
	Balancing different forest values: Evaluation of forest management scenarios in a multi-criteria decision analysis framework	J Eggers, S Holmgren, EM Nordström, T Lämås, T Lind, K Öhman	2019	Besides traditional timber production, other forest functions, such as biodiversity and recreation, have gained increasing importance during the last few decades. Demands on forests have become more diversified, thus making forest management and planning more complex. To meet these challenges, there is a growing interest in a more diversified silviculture, for which a number of different manageme…					Forest Policy and Economics
	Balancing forest profitability and deadwood maintenance in European commercial forests: a robust optimization approach	ALD Augustynczik, R Yousefpour	2019	This study seeks to include two central aspects of forest management into an optimized forest planning model for commercial European forests: (i) the uncertainty related to climate change and forest responses to new environmental conditions and (ii) the maintenance of deadwood on forest stands, essential for sustaining biodiversity and promoting forest resilience. We analyzed forest outcomes of a…					European Journal of Forest Research
2nd round	Balancing trade-offs between ecosystem services in Germany's forests under climate change	M Gutsch, P Lasch-Born, C Kollas, F Suckow, CPO Reyer	2018	Germany's forests provide a variety of ecosystem services. Sustainable forest management aims to optimize the provision of these services at regional level. However, climate change will impact forest ecosystems and subsequently ecosystem services. The objective of this study is to quantify the effects of two alternative management scenarios and climate impacts on forest variables indicative of ec…	Yes	2	Until 2045	Germany	Environmental Research Letters
	Benefits of forest conservation on riverine sediment and hydropower in the Tonle Sap Basin, Cambodia	M Kaura, ME Arias, JA Benjamin, C Oeurng…	2019	Recent deforestation rates in Cambodia are among the world’s largest, while hydropower development has accelerated in the Mekong region. Deforestation accelerates erosion, increasing river sediments heading to reservoirs and decreasing hydropower production. Forest protection could be seen as a service to hydropower, which the FOR-POWER model quantifies. Using recent deforestation estimates, annu…					Ecosystem Services
2nd round	Biological and market responses of pine forests in the US Southeast to carbon fertilization	JD Henderson, R Parajuli, RC Abt	2020	In the coming decades, climate change is projected to cause carbon dioxide fertilization effects in pine forests in the US Southeast. Resulting changes in pine (loblolly) growth will impact forest markets and regional carbon sequestration. We examine this impact in the context of baseline demand scenarios of increasing sophistication to determine the relative impact of growth and business as usua…	Yes	4	2013-2063	Pine forests in the US Southeast	Ecological Economics
2nd round	Biomass and Carbon Dynamics in Forest Management at a Strategic Scale	MA Carle, S D'Amours, R Azouzi	2016	This study explored these two questions: (1) How much carbon can be stored in the forest? and (2) Which forest management regimes best achieve the dual objectives of high sustained timber yield and high carbon sequestration? A model that can be used to predict carbon sequestration potential within a forest region assuming a given management strategy was developed. First, a carbon sequestration un…	Yes	6	150 years	Québec, Canada	KIRJA
	Bird response to future climate and forest management focused on mitigating climate change	JJ LeBrun, JE Schneiderman, FR Thompson…	2017	Context Global temperatures are projected to increase and affect forests and wildlife populations. Forest management can potentially mitigate climate-induced changes through promoting carbon sequestration, forest resilience, and facilitated change. Objectives We modeled direct and indirect effects of climate change on avian abundance through changes in forest landscapes and assessed impacts on bi…					Landscape Ecology
	Boreal Forests of the Circumpolar World	H Hesseln	2018	The boreal forest accounts for about one-third of all global forest resources and is found in seven of the eight Arctic countries. The boreal biome, also known as the taiga, lies south of the Arctic Circle and runs through Iceland, Norway, Sweden, Finland, Russia, the United States, and Canada (out of the eight Arctic countries), as well as Japan, Mongolia, and Scotland, making it one of the larg…					The GlobalArctic Handbook
No access	Breaking Even? An Investigation into the Costs and Benefits of Syndicated Conservation Easements	SR Khouri	2020
	Business Model Analysis of Natural Production Forest with Sustainable Forest Management Approach	M Noer, N Saribanon, A Nurwulandari	2017	Deforestation and conversion of forest land in Indonesia continues. Data show that within 12 years there has been a decline in forest area in Indonesia amounted to approximately 20 million hectares, or an average of 1.7 million hectares per year. Other data show that between 1990-2010, Indonesia forest area shrank from 118 million hectares to 94 million hectares in 2010, whether caused by changes…					Business Model Analysis of Natural Production Forest with Sustainable Forest Management Approach
	Calculation of potential timber harvesting costs (HeProMo)	C Fischer, G Stadelmann	2019	As proceeds of timber selling are typically not surveyed or measured in national forest inventories, simulated timber harvesting costs are compared with mean timber prices to serve as a proxy for economic timber availability. Consequently, the profitability of timber harvest operations can be interpreted as an economic restriction when evaluating Forest Available for Wood Supply (FAWS). However, …					?Part of the Managing Forest Ecosystems book series MAFE
	Can we store carbon and have our timber and habitat too?	A Watts, T Spies, J Kline, W Cohen	2017	With the passage of the Multiple Use Sustained Yield Act of 1960, the U.S. Forest Service has managed its 193 million acres of forest and grassland for multiple uses, including timber, watersheds, and wildlife. Using today’s terminology, some of these purposes are considered ecosystem services, which encompass a breadth of benefits provided by forests, including their ability to absorb and store …					Science Findings
2nd round	Carbon and biodiversity impacts of intensive versus extensive tropical forestry	BW Griscom, RC Goodman, Z Burivalova…	2017	How should we meet the demand for wood while minimizing climate and biodiversity impacts? We address this question for tropical forest landscapes designated for timber production. We model carbon and biodiversity outcomes for four archetypal timber production systems that all deliver the same volume of timber but vary in their spatial extent and harvest intensity. We include impacts of variable d…	Yes	4	60 years	Tropical forest	Conservation Letters
2nd round	Carbon balance indicator for forest bioenergy scenarios	K Pingoud, T Ekholm, S Soimakallio, T Helin	2016	A carbon (C) balance indicator is presented for the evaluation of forest bioenergy scenarios as a means to reduce greenhouse gas (GHG ) emissions. A bioenergy‐intensive scenario with a greater harvest is compared to a baseline scenario. The relative carbon indicator (RC ) is defined as the ratio between the difference in terrestrial C stocks – that is the C debt – and the difference in cumulative…	Yes	2	30 years	Finland	GCB Bioenergy
	Carbon Capture, Sequestration, and Storage in Washington State Parks: A Review of Relevant Policy and Project Feasibility	GO Gresh	2018	Successful examples of carbon capture and sequestration/storage (CCS) projects within voluntary carbon markets exist throughout the country. This paper examines policies related to the Washington State Parks and Recreation Commission (PARKS), state agency funding, greenhouse gas emissions, cap-and-trade markets, and carbon offset registries to determine the feasibility of providing compensation t…					?Master's Thesis?
	Carbon sequestration and substitution potential of subtropical mountain Sugi plantation forests in central Taiwan	FC Chang, CH Ko, PY Yang, KS Chen, KH Chang	2017	Forests are the most important terrestrial carbon source and sink, with forest biomass and productivity influencing the level of carbon storage in the ecosystem. In this study, the carbon sequestration of Sugi (Japanese cedar) was estimated according to 25-year plantation forest inventory data in the Experimental Forest, National Taiwan University, Nantou County, Taiwan. The total biomass, trunk …					Journal of Cleaner Production
2nd round	Carbon sequestration in managed temperate coniferous forests under climate change	CC Dymond, S Beukema, CR Nitschke, KD Coates, RM Scheller	2016	Management of temperate forests has the potential to increase carbon sinks and mitigate climate change. However, those opportunities may be confounded by negative climate change impacts. We therefore need a better understanding of climate change alterations to temperate forest carbon dynamics before developing mitigation strategies. The purpose of this project was to investigate the interactions …	Yes	4	Until 2050	Copper-Pine Creek valley	Biogeosciences
2nd round	Carbon sequestration potential in stands under the grain for green program in southwest China	X Chen, Y Luo, Y Zhou, M Lu	2016	The Grain for Green Program (GGP) is the largest afforestation and reforestation project in China in the early part of this century. To assess carbon sequestration in stands under the GGP in Southwest China, the carbon stocks and their annual changes in the GGP stands in the region were estimated based on the following information: (1) collected data on the annually planted area of each tree spec…	Yes	2	2020, 2030, 2040, 2050, 2060	Southwest China	? PloS one ?
2nd round	Carbon stocks and timber harvest. Alternative policy approaches for the Great Bear rainforest and their consequences	VC Griess, CD Man, ME Leclerc, J Tansey, GQ Bull	2019	Forest policy-making can be dramatically enhanced by implementing computer based decision support systems (DSS) during the development phase. While stakeholders usually agree on general policy objectives, the best course of action for achieving them is often unclear. Forest DSS can support the assessment of alternative forest policy frameworks with respect to their impact on multiple variables of…	Yes	5	350 years	Great Bear Rainforest in Canada	Forest Policy and Economics
2nd round	Carbon, harvest yields, and residues from restoration in a mixed forest on California's coast range	JP Berrill, HS Han	2016	We simulated growth and yield over a century of restoration activities in a mixed evergreen conifer stand in northern California. Our goal was to compare ecosystem products and services, namely carbon storage, harvest yields, and residue production, among restoration-oriented silvicultural prescriptions promoting conifer dominance. We compared individual-tree selection and group selection with re…	Yes	3+	A century	Northern California	Forest Science
No access	Changes in water and carbon in Australian vegetation in response to climate change	N Liu	2017						?'PhD Thesis?
	Changing wildfire, changing forests: the effects of climate change on fire regimes and vegetation in the Pacific Northwest, USA	JE Halofsky, DL Peterson, BJ Harvey	2020	Background Wildfires in the Pacific Northwest (Washington, Oregon, Idaho, and western Montana, USA) have been immense in recent years, capturing the attention of resource managers, fire scientists, and the general public. This paper synthesizes understanding of the potential effects of changing climate and fire regimes on Pacific Northwest forests, including effects on disturbance and stress inte…					Fire Ecology
2nd round	Climate change effects of forestry and substitution of carbon-intensive materials and fossil fuels	L Gustavsson, S Haus, M Lundblad…	2017	We estimate the climate effects of directing forest management in Sweden towards increased carbon storage in forests with more land set-aside for protection, or towards increased forest production for the substitution of carbon-intensive materials and fossil fuels, relative to a reference case of current forest management. We develop various scenarios of forest management and biomass use to estim…	Yes	3	90+ years	Sweden	Renewable and Sustainable Energy Reviews
No access	Climate Change Impact Modeling: A review and categorisation of existing computational tool	C Georgiadou	2018
2nd round	Climate change mitigation challenge for wood utilization - The case of Finland	S Soimakallio, L Saikku, L Valsta, K Pingoud	2016	The urgent need to mitigate climate change invokes both opportunities and challenges for forest biomass utilization. Fossil fuels can be substituted by using wood products in place of alternative materials and energy, but wood harvesting reduces forest carbon sink and processing of wood products requires material and energy inputs. We assessed the extended life cycle carbon emissions considering …	Yes	6	100 years from 2010 onward	Finland	Environmental Science & Technology
2nd round	Climate change mitigation in Canada's forest sector: a spatially explicit case study for two regions	CE Smyth, BP Smiley, M Magnan, R Birdsey, AJ Dugan, M Olguin, VS Mascorro, WA Kurz	2018	Background We determine the potential of forests and the forest sector to mitigate greenhouse gas (GHG) emissions by changes in management practices and wood use for two regions within Canada’s managed forest from 2018 to 2050. Our modeling frameworks include the Carbon Budget Model of the Canadian Forest Sector, a framework for harvested wood products that estimates emissions based on product ha…	Yes	?	2018-2050	Canada	Carbon Balance and Management
2nd round	Climate change mitigation potential in boreal forests: Impacts of management, harvest intensity and use of forest biomass to substitute fossil resources	TK Baul, A Alam, A Ikonen, H Strandman, A Asikainen, H Peltola, A Kilpeläinen	2017	The impacts of alternative forest management scenarios and harvest intensities on climate change mitigation potential of forest biomass production, utilization and economic profitability of biomass production were studied in three boreal sub-regions in Finland over a 40-year period. Ecosystem modelling and life cycle assessment tools were used to calculate the mitigation potential in substituting…	Yes	?	40 years	Three boreal sub-regions in Finland	Forests
2nd round. Same as Baul et al. row 71	Climate Change Mitigation Potential in Boreal Forests: Impacts of Management, Harvest Intensity and Use of Forest Biomass to Substitute Fossil Resources	BT Kumar, A Ashraful, I Antti, S Harri, A Antti, P Heli, A Kilpeläinen	2017	The impacts of alternative forest management scenarios and harvest intensities on climate change mitigation potential of forest biomass production, utilization and economic profitability of biomass production were studied in three boreal sub-regions in Finland over a 40-year period. Ecosystem modelling and life cycle assessment tools were used to calculate the mitigation potential in substituting…	Yes	?	40 years	Finland	Forests
	Climate Change on the Forests of the Klamath-Siskiyous and Potential Management Strategies.	CJ Maxwell	2018	Forest managers need strategies to deal with the uncertainties around climate change and disturbances like wildfire. I worked with a diverse group of forest managers and interested parties in the Klamath-Siskiyou bioregion of SW Oregon and NW California, a fire-prone and seasonally dry forest, to co-design forest management scenarios that span a broad range of forest and fire management strategie…					?Dissertation?
2nd round	Climate Change, Landowner Preferences and the Future of Private Forests.	JD Henderson	2019	Climate change and landowner preferences will influence the future of forests, particularly in the US South, an important forested area with a high percentage of private forest landowners. This dissertation examines both issues. We use the SRTS model to examine the consequences of carbon fertilization induced by climate change for pine forests in the US Southeast. We examine this impact in the co…	Yes	4	2100	US Southeast; pine forests	?Dissertation?
No access	Climate-vegetation interactions in Fennoscandia: Impact of the representation of vegetation in the regional climate model WRF.	AS Daloz, MT Lund, T Majasalmi	2019	The aim of this project is to examine the potential impacts of future forest management strategies of the Fennoscandian region on the regional climate. Modifications in the vegetation distribution and structure have an impact on terrestrial ecosystem functioning, which in turn affects local and regional climates via changes in surface energy budgets, carbon and water cycling. The climate change i…					Geophysical Research Abstracts
No access	Climate, disturbance, and vulnerability to vegetation change in the Northwest Forest Plan Area	MJ Reilly, TA Spies, RB Littell, JB Kim	2018
	Co‐designed management scenarios shape the responses of seasonally dry forests to changing climate and fire regimes	CJ Maxwell, JM Serra‐Diaz, RM Scheller, JR Thompson	2020	1.Climate change is altering disturbance regimes and recovery rates of forests globally. The future of these forests will depend on how climate change interacts with management activities. Forest managers are in critical need of strategies to manage the effects of climate change. 2.We co‐designed forest management scenarios with forest managers and stakeholders in the Klamath ecoregion of Oregon …					Journal of Applied Ecology
2nd round	Combining Climate Change Mitigation Scenarios with Current Forest Owner Behavior: A Scenario Study from a Region in Southern Sweden	I Lodin, LO Eriksson, N Forsell, A Korosuo	2020	This study investigates the need for change of current forest management approaches in a southern Swedish region within the context of future climate change mitigation through empirically derived projections, rather than forest management according to silvicultural guidelines. Scenarios indicate that climate change mitigation will increase global wood demand. This might call for adjustments of we…	Yes	3	100-year period	Southern Sweden	Forests
	Community earth system model simulations reveal the relative importance of afforestation and forest management to surface temperature in Eastern North America	BJ Ahlswede, RQ Thomas	2017	Afforestation changes the land surface energy balance, though the effects on climate in temperate regions is uncertain, particularly the changes associated with forest management. In this study, we used idealized Community Earth System Model simulations to assess the influence of afforestation and afforestation management in eastern North America on climate via changes in the biophysics of the la…					Forests
No access	Community-Based Forest Management in Indonesia: Spatial Patterns and Trends	KE Salosso	2018						?Master's Thesis?
	Comparative life cycle assessment of fossil and bio-based polyethylene terephthalate (PET) bottles	L Chen, REO Pelton, TM Smith	2016	Both biofuels and bioplastics are often regarded as sustainable solutions to current environmental problems such as climate change, fossil depletion and acidification. However, both have been criticized for being economically costly, competing with other societally beneficial goods such as food, and offering limited environmental benefits compared to their fossil counterparts. This study provides…					Journal of Cleaner Production
2nd round	Comparison of carbon balance and climate change mitigation potential of forest management strategies in the boreal forest of Quebec (Canada)	L Paradis, E Thiffault, A Achim	2019	Management of the world’s forests can play a role for climate change mitigation by increasing CO2 storage in vegetation biomass and harvested wood products, and by displacing CO2-intensive materials such as steel or concrete. This study aimed to determine how management of boreal forest stands could contribute to climate change mitigation in the context of ecosystem-based management. The study wa…	Yes	1+4	199 years	Balsam fir-white birchs stand in the Eastern boreal forest of Quebec, Canada	Forestry: An International Journal of Forest Research
	Comprehensive comparative economic evaluation of woody biomass energy from silvicultural fuel treatments	RM Campbell, NM Anderson	2019	Fuel treatments are used in overstocked, fire-prone forests to alter wildfire behavior and reduce fire risk. Some of the benefits they provide are not captured in markets, and therefore represent unaccounted environmental externalities that can lead to inefficient decision making. This study uses a replicable method to integrate market and nonmarket economic values into a comprehensive economic e…					Journal of Environmental Management
	Concept to practice of geospatial-information tools to assist forest management and planning under precision forestry framework: a review	MJ Fardusi, F Chianucci, A Barbati	2017	Precision forestry is a new direction for better forest management. Precision forestry employs information technology and analytical tools to support economic, environmental and sustainable decision; the use of geospatial information tools enables highly repeatable measurements, actions and processes to manage and harvest forest stands, simultaneously allowing information linkages between product…					Annals of Silvicultual Research
	Connection to the Ecosystem Service Studies	M Ooba, K Hayashi	2017	This section explains the relationship between landscape management (LM) and ecosystem services (ESs). A proper LM would have two aspects, namely pros and cons, from the perspective of biodiversity and ESs. Improper LM may cause negative impacts on the ESs and ecosystems. On the other once an LM is done properly, several positive benefits can be derived from it. Then the trade-off between the imp…					Labor Forces and Landscape Management
No access	Considerations of ecosystem services in ecological forest management	C Malouin, GR Larocque, M Doyle	2016						?Ecological Forest Management Handbook?
	Continental mapping of forest ecosystem functions reveals a high but unrealised potential for forest multifunctionality	F Van der Plas, S Ratcliffe, P Ruiz‐Benito …	2018	Humans require multiple services from ecosystems, but it is largely unknown whether trade‐offs between ecosystem functions prevent the realisation of high ecosystem multifunctionality across spatial scales. Here, we combined a comprehensive dataset (28 ecosystem functions measured on 209 forest plots) with a forest inventory dataset (105,316 plots) to extrapolate and map relationships between var…					Ecology Letters
	CORRIM: Report–Module G1 Cradle-to-Gate Life-Cycle assessment of Glued Laminated Timbers US Pacific Northwest Region	T Bowers, M Puettmann, I Ganguly, I Eastin	2017	The goal of this study is to update the 2000 life cycle inventory (LCI) data on material and energy inputs associated with the production of glued-laminated timbers or glulam produced in the Pacific Northwest region of the United States. Data was obtained by surveying manufacturers within this region. Surveys were consistent with CORRIM protocols for performing LCIs of wood products, and the repo…					?Review draft
same than in the above row	CORRIM: Report–Module G2 Cradle-to-Gate Life-Cycle assessment of Glued Laminated Timbers US Southeast	T Bowers, M Puettmann, I Ganguly, I Eastin	2017	The goal of this study is to update the 2000 life cycle inventory (LCI) data on material and energy inputs associated with the production of glued-laminated timbers or glulam produced in the southeast United States. Data was obtained by surveying manufacturers within this region. Surveys were consistent with CORRIM protocols for performing LCIs of wood products, and the reporting follows ISO 1404…					?Review draft
2nd round	Costs and carbon sequestration potential of alternative forest management measures in Germany	M Bösch, P Elsasser, J Rock, S Rüter, H Weimar…	2017	The objective of this study is to assess the costs and the carbon sequestration potential of selected forest management measures in Germany, including effects on the harvested wood products (HWP) pool. We consider five different scenarios, each referring to an alternative level of wood harvests (due to changing rotation lengths or setting forest areas aside). The cost calculation is done within a…	Yes	5	2014-2048	Germany	Forest Policy and Economics
	Creating criteria and indicators for use in forest management planning: a case study with four First Nations communities in British Columbia	J Spies	2017	In British Columbia (BC), Canada, there is a rapid shift in forest management systems as a result of historic and recent title cases involving Indigenous communities. Today, modern treaties mean more decision making power for the Indigenous communities that treaties involve. This research is built on that progression and was part of a collaboration with four Indigenous communities in BC to develo…					?Master's thesis?
	Data and Tools to Operationalize Ridge-to-Reef Management and Build Island Resilience in Oceanic Island Environments.	J Delevaux	2017	Around the Pacific, a cultural renaissance rooted in the concern over declining natural resources seeks to revive traditional ridge-to-reef management approaches to promote social and ecological resilience in a changing climate. However, the effectiveness of ridge-to-reef management remains unclear due to a poor understanding of the cumulative effects of human and natural disturbances. In high Pa…					?Dissertation
	Dealing with storm impacts on the forest sector through integrated and systemic approaches at the regional level	S Riguelle	2016	Wind is one the most damaging natural hazard that forests are facing worldwide and in Europe. Destructive storms lead to severe forest damage and consequently cause disruptions in daily forest management and timber supply chains. Major dysfunctions can happen at each step of forest-wood chains and at each level of management, leading to huge economic losses and long-lasting crises within public o…					?Dissertation
	Decision-making in forestry: a review of the hydridisation of multiple criteria and group decision-making methods	E Ortiz-Urbina, J González-Pachón, L Diaz-Balteiro	2019	The degree of complexity in forest management has increased in the last few decades, not only due to the inclusion of specific new issues (e.g., climate change, social protection, etc.), but also because these new, as well as classic, issues have to be dealt with in a context characterised by multiple conflicting criteria that are evaluated by different stakeholders. Nowadays, the multicriteria i…					Forests
No access	Decomposition Dynamics and Carbon Sequestration of Downed Coarse Woody Debris of Fagus Sylvatica, Picea Abies and Pinus Sylvestris	S Herrmann	2017						?Dissertation?
	Delivering Resilient Forests	I Willoughby, S Peace	2019	The UK Forestry Standard and country forestry policies for England, Scotland and Wales all acknowledge that resilient forests are important if our trees are to cope better with changing environmental conditions, and current and emerging pest and disease threats. There are however gaps in understanding what exactly this means and how it may be achieved in practice. Recognising this challenge, a ma…					?Royal Forestry Society?
2nd round	Determining economically viable forest management option with consideration of ecosystem services in Korea: A strategy after successful national forestation	J Lee, H Kim, C Song, GS Kim, WK Lee, Y Son	2020	Economic assessment of forest management, including tending, thinning, and clear-cut, is essential to maximize social benefits. This study investigated the economic viability of forest management in the Republic of Korea at national scale (2017–2100) by quantitative approaches. The changes in benefits of four ecosystem services (timber production, CO2 sequestration, water yield enhancement, and d…	Yes	2	100 years	Republic of Korea	Ecosystem Services
	Determining the Carbon Footprint of Wood	E Lorenz, M VanGeem, T Lawrence, R Schenk	2016	In reviewing the many LCAs conducted on wood products and wood structures, there was a lack of consistency and completeness in the studies. Inconsistencies or information lacking in the reviewed LCI and LCA studies can be grouped into four main categories. In general, these studies • Did not account for carbon from all five carbon pools as identified by the IPCC (2003). • Assumed that the global …					?Portland Cement Association
	Developing a microsimulation model for farm forestry planting decisions	M Ryan, C O'Donoghue	2019	There is increasing pressure in Europe to convert land from agriculture to forestry which would enable the sequestration of additional carbon, thereby mitigating agricultural greenhouse gas production. However, there is little or no information available on the drivers of the land use change decision from agriculture to forestry at individual farm level, which is complicated by the intertemporal …					International Journal of Microsimulation
2nd round	Developing alternative forest spatial management plans when carbon and timber values are considered: A real case from northeastern China	L Dong, W Lu, Z Liu	2018	Forest ecosystems play an important role in mitigating global climate change, and this role has recently been further reinforced by the Paris Agreement. However, our knowledge with respect to the trade-offs between timber production and carbon sequestration in forest ecosystems is still seriously deficient. Therefore, the overall goal of this study is to quantitatively analyze the effects of a se…	Yes	4	50 years	A large forest in northeastern China	Ecological Modelling
	Developing Fire Reduction Strategy for Miombo Woodlands as a Potential tool for Carbon Storage and Sequestration	JZ Katani, SS Modoffe, F Midtgaard, AA Rija	2016	World-wide, wildfires cause problems and when uncontrolled or misused they wreak havoc on society and the environment. In Tanzania, fire occurs in most parts of the Miombo woodlands, and some of them cause significant eco-logical and socio-economic impacts. Several efforts have been made in Tanzania to reduce the occurrence of fire in Miombo but their success has been constrained by underfunding …					?Book Chapter?
	Development of the Forest Biomass and Dead organic matter Carbon And Nitrogen (FBDCAN) model: Balancing reliability with realism	H Kim, H Chang, Y Roh, J An, Y Son	2019	Mathematical models have been developed to predict forest carbon (C) and nitrogen (N) cycles, especially in response to climate change and forest management practices, and to support management and policy decisions. Model development needs to balance reliability (the model produces reliable results) with realism (the required processes are represented in detail). Using more processes in a model m…					? American Geophysical Union ?
	Dimensionless numbers for the net present value and the perpetual value of sustainable timber harvests from a monospecific uneven-aged forest	I López Torres, C Belda Fullana	2019	This paper proposes a simple and direct method to provide reliable approximations of the net present value (NPV) and the perpetual value (PV) of sustainable timber harvests from a monospecific uneven-aged forest based on dimensionless numbers. In addition, two new dimensionless numbers ρNPV and ρPV are introduced. These use the NPV or PV derived from the sale of timber throughout a harvest cycle,…					iForest - Biogeosciences and Forestry
	Disequilibrium of fire-prone forests sets the stage for a rapid decline in conifer dominance during the 21 st century	JM Serra-Diaz, C Maxwell, MS Lucash, RM Scheller, DM Laflower, AD Miller, AJ Tepley, HE Epstein, KJ Anderson-Texeira, JR Thompson	2018	The impacts of climatic changes on forests may appear gradually on time scales of years to centuries due to the long generation times of trees. Consequently, current forest extent may not reflect current climatic patterns. In contrast with these lagged responses, abrupt transitions in forests under climate change may occur in environments where alternative vegetation states are influenced by dist…					Scientific Reports
	Disturbance and climate change risks to forest carbon sinks and potential management responses	C Dymond	2018	Climate change is a global crisis facing forest management. There are risks to many ecological goods and services from forests due to changes in productivity, mortality, pathogen, and wildfire dynamics. Likewise, there are opportunities such as increases in productivity or targeted funding for climate adaptation and emission reductions. To manage those risks and opportunities, we need the fundame…					?Dissertation?
	Diversification of forest management regimes secures tree microhabitats and bird abundance under climate change	ALD Augustynczik, T Asbeck, M Basile, J Bauhus, I Storch, G Mikusinski, R Yousefpour, M Hanewinkel	2019	The loss of biodiversity in temperate forests due to combined effect of climate change and forest management poses a major threat to the functioning of these ecosystems in the future. Climate change is expected to modify ecological processes and amplify disturbances, compromising the provisioning of multiple ecosystem services. Here we investigate the impacts of climate change and forest manageme…					Science of the Total Environment
	Do certified private forest plantations increase the provision of and access to social services for local communities?	MB Degnet, VJ Ingram, E van der Werf, J Wesseler	2017	This study examines the impacts of sustainable forestry operations (FSC certified) as compared to conventionally-managed, government owned forest operations on the access of local households to healthcare, schools and physical infrastructure (roads, bridges). We present the results of structured interviews with 338 households in Tanzania, randomly selected from two villages located near privately…					?Conference Paper
	DOES BIOENERGY DEMAND IMPROVE FOREST MANAGEMENT?	J Giuntoli, S Searle	2019	Policies in the European Union, the United States, and Canada support the use of forest biomass in heating, power generation, and transportation as a climate mitigation strategy. This support continues despite evidence from several scientific studies that forest bioenergy does not generally reduce lifecycle greenhouse gas (GHG) emissions when compared with fossil fuels. Forest bioenergy has even …					White paper
	Does certification change the trajectory of tree cover in working forests in the tropics? An application of the synthetic control method of impact evaluation	P Rana, E Sills	2017	As one of the oldest systems for certifying sustainable production practices, the Forest Stewardship Council (FSC) can offer important lessons about this approach to conservation. In particular, the nearly 25 year history of FSC makes it possible to evaluate how the impacts of certification evolve over time. We estimate causal effects on deforestation from the year of certification to 2012 in ten…					?Center for Environmental and Resource Economic Policy Working Paper Series
	Does the ecosystem service discourse succeed in promoting nature conservation?	S González López	2018	The concept of ecosystem services (ES) has gained a foothold in, both, the scientific and political worlds. ES are the benefits people gain from nature and its diversity in all, and the concept has gained popularity especially when nature conservation is discussed. However, can such utilitarian approach conserve the biodiversity in its various forms? The aim of this study was to find out, how wil…					?Master's Thesis?
	Does thinning affect the soil respiration in silver fir, beech and spruce predominating adult forest stands?	M Čater	2016	In three high karst forest complexes, same spatial design was applied to observe the effect of silvicultural treatment - the degree of mature stand removal on soil efflux. In every forest complex nine subplots were established during the time of experiment according to predominating tree species in growing stock of the mature canopy stand - silver fir, Norway spruce and European beech. In 2012 si…					?9th Congress of the Soil Science Society of Bosnia and Herzegovina?
	Drivers of degradation and other threats	E Doblas Miranda, F Attorre, J Azevedo…	2018	Forests in the Mediterranean region have been subject to environmental changes since time immemorial. The region’s geography and location has made it a conducive environment between biomes, resulting in significant biodiversity. Since the beginning of human history, forests have adapted to pressures caused by human development, resulting in a complex socio-ecological balance. These pressures, how…					FAO; Plan BLEU
2nd round	Dynamic simulation of carbon stocks in tropical lowland savanna in East Nusa Tenggara, Indonesia	AA Almulqu, J Boonyanuphap	2017	Tropical forest can stabilize CO2 concentration in atmosphere by absorbing CO2 through photosynthesis process and store it in forest biomass. Carbon stock information in forest biomass is required to facilitate carbon sink programme. This study aims to calculate carbon pools and carbon sequestration, and to simulate the dynamics of carbon stocks in the tropical lowland savanna by using the Carbon…	Yes	3	200 years	Taman Wisata Alam Camplong (Camplong Nature Recreation Park), Camplong village, Kupang Regency, East Nusa Tenggara Province, Indonesia	Naresuan University Journals
	Ecological restrictions in forest biomass extraction for a sustainable renewable energy production	EN Manolis, TD Zagas, GK Karetsos, CA Poravou	2019	Renewable Energy Sources investments are scaling up across the Mediterranean region. The small scale utilization of the forest biomass for bioenergy purposes could boost the socio-economic benefits in a decentralized level, tackle the energy poverty and reduce the forest fire risk. This research contributes to a more sustainable use of the forest biomass for bioenergy purposes. From plant tissues…					Renewable and Sustainable Energy Reviews
	Economic analysis of natural forest disturbances: A century of research	F Giannetti, N Puletti, S Puliti, D Travaglini, G Chirici	2020	Natural disturbances have always affected forest ecosystems, altering or disrupting the flows of goods and services provided by forests. In response, people have had to adapt their economic activities and decisions to take such hazards into account and to limit their consequences. In this paper, we conduct a survey on how economic analysis deals with such an issue, considering the different natur…					Journal of Forest Economics
	Economic and climate change mitigation tradeoffs between forest management strategies aimed at reducing wildfire risk in the Lake Tahoe Basin, California, USA	MD Potts, S Evans, T Holland, J Long, B Garrett	2019	In recent years, California's mixed conifer forests have seen an increasing frequency and severity of wildfires. These wildfires increase forest carbon emissions and negatively impact local economics through property loss and health impacts. To develop management interventions, using the Lake Tahoe Basin as a case study and the Landis forest simulation model, we explored the impact of a range of …					? American Geophysical Union ?
	Economic and ecological trade-off analysis of forest ecosystems: options for boreal forests	S Chen, C Shahi, HYH Chen	2016	Intensive forest management practices for production forestry can potentially impact the sustainability of ecological functions and associated forest ecosystem services. Understanding the trade-offs between economic gains and ecological losses is critical for the sustainable management of forest resources. However, economic and ecological trade-offs are typically uncertain, vary at temporal and s…					Environmental Reviews
	Economic and Spatial Impacts of a Wildlife Habitat Policy on Forest Management	KN Bothwell	2017	Regulations protecting habitat of forest-dwelling species often impact forest management practices. Those impacts may be mutually beneficial to both wildlife and forestry or they may lead to unanticipated negative outcomes, such as an associated economic cost compared to management free from habitat regulations. One example of a regulation that impacts forest management is the zoning of winter ha…					?Master's thesis?
	Economic Feasibility of Managing Loblolly Pine Forests for Water Production under Climate Change in the Southeastern United States	A Susaeta, DC Adams, C Gonzalez-Benecke, JR Soto	2017	In this study, we assessed the impacts of climate change, forest management, and different forest productivity conditions on the water yield and profitability of loblolly pine stands in the southeastern United States. Using the 3-PG (Physiological Processes Predicting Growth) model, we determined different climatic projections and then employed a stand level economic model that incorporates, for …					Forests
	Economic sustainability of payments for water yield in slash pine plantations in Florida	A Susaeta, JR Soto, DC Adams, DL Allen	2016	Forests play an important role with respect to water resources, and can be managed to increase surface- and groundwater recharge. With the creation of a forest water yield payment system, privately-owned forests, which comprise the majority of forest area in the Southeastern US, could become an important potential source of additional water supply. The economic tradeoffs between timber revenues a…					Water
	Economic viability of longleaf pine management in the Southeastern United States	A Susaeta, P Gong	2019	The lack of economic information for management of longleaf pine, a forest type that once dominated the landscape in the southeastern United States, can be a major barrier to landowners to planting this species. This study compares the economic performance of even-aged longleaf pine with loblolly pine. We assume that a longleaf pine stand produces timber, water yield, wildlife habitats and pinest…					Forest Policy and Economics
	Ecosystem mapping for the implementation of the European Biodiversity Strategy at the national level: The case of Italy	C Blasi, G Capotorti, MMA Ortí, I Anzellotti…	2017	Several international initiatives, including the European Biodiversity Strategy to 2020, promote the identification and mapping of ecosystems as basic tools for the conservation of biodiversity and related services. On coarse scales, the spatial representation of ecosystems is usually based on broad land cover categories that largely overlook important ecological and biogeographic features of the…					Environmental Science & Policy
	Ecosystem service benefits generated by improved water quality from conservation practices	L Wainger, J Loomis, R Johnston, L Hansen, D Carlisle…	2017	This report presents results of an interdisciplinary team who evaluated the state of the science for valuing ecosystem services derived from implementing conservation practices on agricultural and forest lands. A case study of conservation practices on farms within the Western Lake Erie Basin was used to illustrate methods for estimating monetary values and non-monetary benefit indicators for fiv…					?The Council on Food, Agricultural & Resource Economics
	Ecosystem service relationships: formation and recommended approaches from a systematic review	S Wu, S Li	2019	Ecosystem services interact and can form neural, synergic, and trade-off relationships with each other. Current studies of ecosystem service relationships have focused more on quantification without analyzing the driver of these interactions. Here, we proposed a qualitative method based on the number of shared optimal ecosystem attributes among services to study the possible driver of ecosystem s…					Ecological Indicators
2nd round	Ecosystem service trade-offs for adaptive forest management	F Schwaiger, W Poschenrieder, P Biber, H Pretzsch	2019	Quantifying ecosystem services as dependent on forest management and analyzing tradeoffs between them can help to make decisions on management more effective, efficient, sustainable, and stable. We use a forest management model (SILVA) to predict changes in ecosystem service provisions. Three stakeholder specific forest management scenarios (multifunctional, wood production, set-aside) for each o…	Yes	3	?	Two case study areas in Germany	Ecosystem Services
2nd round	Ecosystem services of boreal forests–Carbon budget mapping at high resolution	A Akujärvi, A Lehtonen, J Liski	2016	The carbon (C) cycle of forests produces ecosystem services (ES) such as climate regulation and timber production. Mapping these ES using simple land cover -based proxies might add remarkable inaccuracy to the estimates. A framework to map the current status of the C budget of boreal forested landscapes was developed. The C stocks of biomass and soil and the annual change in these stocks were qua…	?	?	?	Southern Finland	Journal of Environmental Management
	Effects of bioenergy production on environmental sustainability: a preliminary study based on expert opinions in Italy and Turkey	T Deniz, A Paletto	2018	In future decades, initiatives on biomass-based energy development in Europe should reduce fossil fuel dependence and help to combat climate change as required by the conference of the parties 21. In this context, forest biomass can play a key role within the bioenergy sector due to its high growth potential. The use of forest biomass for energy has positive and negative effects on other ecosyste…					Journal of Forestry Research
2nd round	Effects of climate change and management on net climate impacts of production and utilization of energy biomass in Norway spruce with stable age‐class distribution	P Torssonen, A Kilpeläinen, H Strandman, S Kellomäki, K Jylhä, A Asikainen, H Peltola	2016	We studied the effects of climate change and forest management scenarios on net climate impacts (radiative forcing) of production and utilization of energy biomass, in a Norway spruce forest area over an 80‐year simulation period in Finnish boreal conditions. A stable age‐class distribution was used in model‐based analyses to identify purely the management effects under the current and changing c…	Yes	?	80 years	Finland	Global Change Biology BIOENERGY
2nd round	Effects of CMIP5 projections on volume growth, carbon stock and timber yield in managed Scots pine, Norway spruce and silver birch stands under southern an northern boreal conditions	L ALRahahleh, A Kilpeläinen, VP Ikonen, H Strandman, A Venäläinen, H Peltola	2018	We investigated how recent-generation (CMIP5) global climate model projections affect the volume growth, carbon stock, timber yield and its profitability in managed Scots pine, Norway spruce and Silver birch stands on medium fertile upland sites under southern and northern boreal conditions in Finland. Forest ecosystem model simulations were conducted for the current climate and changing climate,…	Yes	2x10?	90 years	Finland; Scots pine, Norway spruce and Silver birch	Forests
2nd round	Effects of forest conservation and management on volume growth, harvested amount of timber, carbon stock, and amount of deadwood in Finnish boreal forests under changing climate	L Alrahahleh, VP Ikonen, A Kilpeläinen, P Torssonen, H Strandman, A Asikainen, J Kaurola, A Venäläinen, H Peltola	2016	We employed a forest ecosystem model (SIMA) to study how the changes in forest conservation area and management affect the volume growth, harvested amount of timber, carbon stock, and amount of deadwood in Finnish boreal upland forests under current and changing climates (RCP4.5 and RCP8.5) over 2010–2099. Simulations were carried out on National Forest Inventory plots using three different fores…	Yes	6	2010-2099	Boreal upland forests in Finland	Canadian Journal of Forest Research
2nd round	Effects of initial age structure of managed Norway spruce forest area on net climate impact of using forest biomass for energy	A Kilpeläinen, H Strandman, T Grönholm, VP Ikonen, P Torssonen, S Kellomäki, H Peltola	2017	We investigated how the initial age structure of a managed, middle boreal (62°N), Norway spruce-dominated (Picea abies L. Karst.) forest area affects the net climate impact of using forest biomass for energy. The model-based analysis used a gap-type forest ecosystem model linked to a life cycle assessment (LCA) tool. The net climate impact of energy biomass refers to the difference in annual net …	Yes	4?	80 years	Spruce forest in Norway	BioEnergy Research
	Effects of stand variables on stemflow and surface runoff in pine-oak forests in northern Mexico	F Cruz-Garcia, JC Monárrez González, A Tecle…	2020	The flow of water in temperate forests depends on the amount of precipitation, type of soil, topographic features, and forest cover, among other factors. Unlike the first three, forest cover can be modified by silvicultural treatments, the effects of which manifest in the quality and quantity of water, as well as in the transport of sediments and soil nutrients. The objective of this study was to…					PLOS one
2nd round	Effects of using certain tree species in forest regeneration on volume growth, timber yield, and carbon stock of boreal forests in Finland under different CMIP5 projections	L ALRahahleh, A Kilpeläinen, VP Ikonen, H Strandman, A Asikainen, A Venäläinen, J Kaurola, J Kangas, H Peltola	2018	We studied how the use of certain tree species in forest regeneration affected the volume growth, timber yield, and carbon stock of boreal forests in Finland under the current climate (1981–2010) and recent-generation global climate model (GCM) predictions (i.e., multi-model means and individual GCMs of CMIP5), using the representative concentration pathways RCP4.5 and RCP8.5 over the period 2010…	Yes	3x13x3	2010-2099	Finland	European Journal of Forest Research
	Efficiency and sustainability indicators for papermaking from virgin pulp—An emergy-based case study	F Corcelli, M Ripa, S Ulgiati	2018	The pulp and paper sector is the fourth-largest industrial sector worldwide in terms of energy use, accounting for approximately 6% of the total industrial energy consumption and contributing to 2% of direct carbon dioxide (CO2) emissions produced by industries. The definition of the environmental profile of this industrial sector is crucial, due to the high market demand of paper and the increas…					Resources, Conservation and Recycling
	Embedding spatiotemporal changes in carbon storage into urban agglomeration ecosystem management—A case study of the Yangtze River Delta, China	J Gao, L Wang	2019	Changes in land use/land cover caused by urban expansion have changed the soil respiration conditions and surface vegetation, which, in turn, affect carbon storage in an ecosystem. Carbon storage is often used as an indicator of the state of ecosystem services in the environment, which provide fundamental support to the human population. Therefore, we predicted the impacts of different developmen…					Journal of Cleaner Production
	Emission Omissions: Carbon accounting gaps in the built environment	S Stiebert, D Echeverría, P Gass, L Kitson	2019	There is a rising interest in Canada about how the choice of building materials may affect future greenhouse gas (GHG) emissions, and whether a preference for a specific building material or combination of materials can help Canada reduce the GHG emissions of the built environment and achieve targeted emission reductions. Evidence for optimizing the choice of building materials has largely been d…					?IISD Report
	Energy efficiency and environmental assessment of papermaking from chemical pulp-A Finland case study	F Corcelli, G Fiorentino, J Vehmas, S Ulgiati	2018	Pulp and paper manufacturing sector constitutes one of the largest industry segments in the world in terms of water and energy usage as well as of significant use and release of chemicals and combustion products. Since its chief feedstock –wood fiber– is renewable, this industry can play an important role in sustainable development, becoming an example of how a resource can be managed to provide …					Journal of Cleaner Production
	Energy Footprint of Biorefinery Schemes	S Bello, G Feijoo, MT Moreira	2019	Biorefineries are evolving systems that have great potential to replace traditional oil-based alternatives. The concept of biorefinery addresses a comprehensive approach to the manufacture of bio-products and bioenergy. The intrinsic objective of a biorefinery is not to exclusively produce a single value-added bioproduct such as cellulose, bioethanol, furfural, hydroxymethyl furfural, etc. The ov…					Energy Footprints of the Bio-refinery, Hotel, and Building Sectors
2nd round	Energy-climate-forest modelling for integrated policy analysis	R Siljander	2016	Increased concern about global warming has led to an intensified search for new and efficient means to reduce greenhouse gas emissions (GHG). So far, forests have been part of climate policies mainly as a source of bioenergy which can substitute for fossil fuels. However, forests constitute also significant sinks and sources of carbon dioxide, which affect the atmospheric carbon balance. This has…	Yes	?	?	Finland	?Master's thesis?
	Environmental assessment of hydrogen production based on Pinus patula plantations in Colombia	CA García, M Morales, J Quintero, G Aroca, CA Cardona	2017	Pinus Patula is widely distributed in Colombia and has become a useful timber specie for reforestation programs. Forest biomass can be used to produce directly hydrogen through thermochemical technologies (e.g. gasification). The aim of this work is to assess the environmental impact of hydrogen production via gasification using P. patula as raw material. The life cycle assessment was carried out…					Energy
2nd round	Environmental impacts of various biomass supply chains for the provision of raw wood in Bavaria, Germany, with focus on climate change	D Klein, C Wolf, C Schulz, G Weber-Blaschke	2016	Wood biomass is considered a renewable raw product, but the supply chain of wood biomass involves non-renewable energy inputs, and thus possibly entailing environmental impacts. The objective of this study was to analyze different environmental impacts (GHG emissions, without biogenic CO2; primary energy consumption, non-renewable; particulate matter) caused by the provision of forest biomass for…	Yes	?	Reference year 2013	Bavaria, Germany	Science of The Total Environment
	Environmental Life Cycle Assessment of industrial pine roundwood production in Brazilian forests	FS Ferro, DAL Silva, FH Icimoto, FAR Lahr…	2018	Pine (Pinus oocarpa) wood has great economic importance in Brazil. Pine stands represent the second largest reforested area in the country due to their industrial interest. Combining the relevance of industrial pine stands in the country and corresponding environmental concerns, this current study aims to identify and quantify the environmental impacts derived from industrial pine roundwood produ…					Science of The Total Environment
	Environmental load analysis of forestation and management process of Larix olgensis plantation by life cycle analysis	Y Liu, M Guo	2017	In China, artificial forests have become key raw material providers for the wood industry, and shouldered the burden of improving ecological system. Silviculture and forest management measures in China have entered an era of mechanization, inevitably need more fossil fuels and synthetic drugs, which harm to ecological environment and human beings. This study evaluates the environmental impact of …					Journal of Cleaner Production
	Environmental performance of biomass refining into high-added value compounds	S González-García, B Gullón, S Rivas, G Feijoo, MT Moreira	2016	Residual woody biomass from wood processing factories is commonly used as raw material for energy purposes. However, special attention is being paid to the development of biorefining systems based on lignocellulosic materials to produce high-added value bioproducts such as soluble saccharides of polymeric and oligomeric nature (POHs), cellulose, lignin, antioxidant extracts, levulinic acid or for…					Journal of Cleaner Production
	Environmental resources conservation through sustainable forest management	V Coletta, F Lombardi, V Altieri, G Bombino	2016	Between XVIII and XX centuries, the forest resources in Calabria region (southern Italy) were intensively exploited and only political strengths, relatively recent, led to a re-establishment of forest cover. Thanks to these actions, from 1957 to 1980, reforestation and forest recovery activities interested 153.000 ha and forest cover increased by 32%, with a consequent reduction of the erosion pr…					Procedia - Social and Behavioral Science
	Environmental sustainability of bark valorisation into biofoam and syngas	S González-García, C Lacoste, T Aicher…	2016	Conventional foams derived from petroleum are extensively used for insulating uses. Research into alternative sources to petroleum based chemicals is attracting a great deal of attention. Softwood bark and in special, maritime pine bark from European forests is an abundant co-product from forest industries. In this study, the production of formaldehyde-free tannin based biofoams to be used as bui…					Journal of Cleaner Production
	Estimated values of carbon sequestration resulting from forest management scenarios	R. Bluffstone; J. Coulston; R.G. Haight; J. Kline; S. Polasky; D.N. Wear; K. Zook	2017	Recent USDA policies, such as the Building Blocks for Climate Smart Agriculture and Forestry, aim to sequester and mitigate greenhouse gases in the forestry and agriculture sectors in the United States. To make informed decisions, the USDA will need to evaluate the carbon benefits of various potential policies. In this paper, we use detailed forest inventory data to project the carbon impacts of …					Report No. 0114-301. Washington, DC: Council on Food, Agricultural and Resource Economics (C-FARE)
	Estimating stand volume and above-ground biomass of urban forests using LiDAR	V Giannico, R Lafortezza, R John, G Sanesi, L Pesola, J Chen	2016	Assessing forest stand conditions in urban and peri-urban areas is essential to support ecosystem service planning and management, as most of the ecosystem services provided are a consequence of forest stand characteristics. However, collecting data for assessing forest stand conditions is time consuming and labor intensive. A plausible approach for addressing this issue is to establish a relatio…					Remote Sensing
2nd round	Estimating the effect of abandoning coppice management on carbon sequestration by oak forests in Turkey with a modeling approach	J Lee, E Makineci, D Tolunay, Y Son	2018	A significant area of the oak forests in Turkey has been historically managed by short-rotation coppicing for wood production. Coppice management was almost abandoned in Turkey in 2006 and so investigating its impact on forest carbon (C) sequestration has become an important issue. Therefore, we investigated the net effect of this change in management on C sequestration by oak forests in Turkey u…	Yes	2	100 years	Oak forests in Turkey	Science of the Total Environment
2nd round	Estimation forecast of the Russian Federation forests carbon balance based on the long-term scenarios of forest complex development	IO Torzhkov, AV Konstantinov, EA Kushnir	2019	The study assessed the carbon balance of the forests in Russia according to long-term plans for the economic development of the forest sector until 2050, taking into account the expected climate changes. The calculated data of the regional climate model for the IPCC (Intergovernmental Panel on Climate Change) RCP-8.5 plan to assess the impact of changes in physical abiotic factors on the forest e…	Yes	3	Until 2050	Russia	IOP Conference Series: Earth and Environmental Science
2nd round	Evaluating carbon storage, timber harvest, and habitat possibilities for a Western Cascades (USA) forest landscape	JD Kline, ME Harmon, TA Spies…	2016	Forest policymakers and managers have long sought ways to evaluate the capability of forest landscapes to jointly produce timber, habitat, and other ecosystem services in response to forest management. Currently, carbon is of particular interest as policies for increasing carbon storage on federal lands are being proposed. However, a challenge in joint production analysis of forest management is …	Yes	A number of combinations for 10 variables		160000 ha Western Cascade Mountains of Oregon, USA	Ecological Applications
	Evaluating Multi-objective Trade-offs in Mature Douglas-fir (Pseudotsuga menziesii) Stands of Western Oregon	NG Williams	2019	Contemporary forest management involves a more extensive and diverse suite of management objectives than was the case throughout much of the Twentieth Century. Heightened public and political awareness of local and global biodiversity decline, and interest in arresting these trends, has increased the emphasis on broad-based biodiversity conservation as an outcome of forest management in many temp…					?Dissertation?
	Evaluating the contribution of forest ecosystem services to societal welfare through linking dynamic ecosystem modelling with economic valuation	G Zanchi, MV Brady	2019	Trade-offs exist among the multiple ecosystem services (ES) generated by forests. Generally, wood production conflicts with the provisioning of public-good ES such as the storage of carbon, nutrient retention and conservation of biodiversity. Recognizing that forests generate both private- and public-good ES implies that forestry should be optimized to maximize the contribution of forests to soci…					Ecosystem Services
	Evaluation of bilberry and cowberry yield models by comparing model predictions with field measurements from North Karelia, Finland	H Kilpeläinen, J Miina, R Store, K Salo, M Kurttila	2016	Models estimated for non-wood forest products (NWFPs) are used to support the multi-objective use of forest and related decision making in various ways. In Finland, bilberries (Vaccinium myrtillus) and cowberries (Vaccinium vitis-idaea) are among the most important NWFPs, and yield models for them have been estimated and linked into forest simulators. So far, berry yield models have not been eval…					Forest Ecology and Management
2nd round	Evaluation of future forest management scenarios for Sweden using process-based ecosystem models.	A Sofie Lansø, A Resovsky, M Mishurov, B Guenet, P Peylin, B Smith, J Bergh, N Vuichard, P Messina, J Ryder, K Naudts, YY Chen, J Otto, M McGrath, A Valade, S Luyssaert	2018	LPJ-GUESS and ORCHIDEE-CN-CAN, two state-of-the-art vegetation models, have been further developed, parameterized and validated in order to simulate the interactions between nutrient limitations and forest management and their impact on the carbon cycle. This study builds upon these developments and aims to understanding the impact of forest management and nitrogen limitation on productivity and …	Yes	?	?	Sweden	? 20th EGU General Assembly ?
	Evaluation of the effects of three European forest types on slope stability by field and probabilistic analyses and their implications for forest management	EA Chiaradia, C Vergani, GB Bischetti	2016	It is well known that forests play a crucial role in preventing soil erosion and landslides; however, forests are also subjected to dynamic evolution driven by natural processes and anthropogenic factors. This dynamic evolution affects spruce and chestnut forests in some European regions (e.g., Italian Alps, central and northern Europe), where these species have been forced by management practice…					Forest Ecology and Management
	Evaluation on China's forestry resources efficiency based on big data	L Li, T Hao, T Chi	2017	The development of China's forestry resources has never been more challenging due to serious problems such as shortage, inferiority and uneven distribution of forestry resources. Therefore, the study and evaluation of China's forestry resources has a great significance to improve efficiency and ensure the sustainable development of the forestry resource. Meanwhile, the vast territory, huge popula…					Journal of Cleaner Production
	Ex ante evaluation of a PES system: Safeguarding recreational environments for nature-based tourism	J Tikkanen, R Hokajärvi, T Hujala, M Kurttila	2017	This paper evaluates the potentials of landscape and recreational values trading (LRVT), a system of payments for ecosystem services, as a vehicle to simultaneously preserve recreational environments for the nature-based tourism business and enhance welfare in rural communities. Ruka-Kuusamo in northeastern Finland serves as a case region for the ex ante evaluation. A novel evaluation framework o…					Journal of Rural Studies
	Examining the vulnerability of localized reforestation strategies to climate change at a macroscale	K Lochhead, S Ghafghazi, V LeMay, GQ Bull	2019	Climate change is altering the nature and condition of vast areas in the boreal forest of Canada. There are great uncertainties concerning impacts on the forest, along with how policy and economic responses will translate effectively between local and macroscales. In particular, planting tree seedlings with improved characteristics following harvesting is one localized response strategy considere…					Journal of Environmental Management
	Expanding green supply chain performance measurement through emergy accounting and analysis	X Tian, J Sarkis	2019	Emergy accounting has existed for decades. Emergy evaluates the donor side contribution of nature at region or country, macro-level analyses. It has been rarely applied and considered for organizational or supply chain management. In this study we provide an introduction and background on how emergy accounting analysis can be adjusted and applied at the supply chain level. Supplier selection is t…					International Journal of Production Economics
	Expert-based and correlative models to map habitat quality: Which gives better support to conservation planning?	M Di Febbraro, L Sallustio, M Vizzarri, D De Rosa, L De Lisio, A Loy, BA Eichelberger, M Marchetti	2018	Biodiversity loss and habitat degradation are big challenges to be tackled by conservation planning since their effects on both ecological and social-economic systems are remarkably detrimental. Efforts to limit anthropogenic impacts on species and habitats need to be assisted by tools for biodiversity monitoring. Effective monitoring tools could help bridge the gap between science and policy, be…					Global Ecology and Conservation
	Exploring ecosystem services and scenario simulation in the headwaters of Qiantang River watershed of China	X Sun, Y Zhang, Y Shen, TO Randhir, M Cao	2019	Background Land use change has a significant impact on ecosystem services in watershed systems. The upper part of Qiantang River, Kaihua Country has experienced land-use changes over the past 15 years, but the effect of these changes on ecosystem services remains unknown. Objective This study evaluates land-use changes in response to ecological protection and the effects on ecosystem services. Me…					Environmental Science and Pollution Research
	Exploring opportunities for the integration of GNSS with forest harvester data to improve forest management	EA Olivera Farias	2016	Worldwide approximately 3 billion m3 of wood is harvested and removed from forests annually. Forest plantations play an important role in forest harvesting providing 46% of the total industrial roundwood produced in the world, while they account for only 7% of the world’s forested area. Modern harvesting systems are mechanised for productivity, costs, and safety reasons. Due to the advances and a…					?Dissertation?
2nd round	Exploring the effects of climate change mitigation scenarios on timber, water, biodiversity and carbon values: A case study in Pozantı planning unit, Turkey	EZ Baskent	2019	This study evaluated the performance of three climate change mitigation management scenarios; business as usual (BAU), low intensity management (LIM) and high intensity management (HIM) to provide ecosystem services. ETCAP simulation model was used to forecast forest development for Pozantı area with 17,603 ha forests in Turkey. Wood production, biodiversity conservation, carbon sequestration and…	Yes	3	100 years	Pozanti, Turkey	Journal of Environmental Management
	Exploring the potential of combining participative backcasting and exploratory scenarios for robust strategies: Insights from the Dutch forest sector	JO de Bruin, K Kok, MA Hoogstra-Klein	2017	Literature critiques current predictive scenario approaches applied in the forest sector. Backcasting -a means to create normative scenarios- seems promising, but sparsely used. Combining backcasting with exploratory scenarios (combined scenario approach) seems appropriate to address these critiques. We performed such an exercise with the participation of Dutch forest sector stakeholders. A one-d…					Forest Policy and Economics
	Exploring visitors' perceptions of silvicultural treatments to increase the destination attractiveness of peri-urban forests: A case study in Tuscany Region (Italy)	A Paletto, S Guerrini, I De Meo	2017	Peri-urban forests are characterized by multiple-use and various kinds of recreation activities. Public forest services have to take into account ecological, economic and social issues to provide a sustainable management of peri-urban forests, able to improve their attractiveness. Understanding visitors' demands and perceptions on peri-urban forests is a key element to support decision-makers and…					Urban Forestry & Urban Greening
2nd round	Extent and costs of forest-based climate change mitigation in Germany: accounting for substitution	M Bösch, P Elsasser, J Rock, H Weimar, M Dieter	2019	The objective of this study is to quantify the contribution of the German forestry to climate change mitigation and to calculate the associated costs at the national level. For that, the forest and harvested wood products carbon pools are considered as well as energy and material substitution. We compare five different scenarios, each referring to an alternative level of timber harvests (due to c…	Yes	5	2014-2048	Germany	Carbon Management
	F3: Simulating spatiotemporal forest change from field inventory, remote sensing, growth modeling, and management actions	S Huang, C Ramirez, M McElhaney, K Evans	2018	Contemporary forest management requires highly-detailed, spatially-contiguous, multi-temporal, and scenarios-comparable forest conditions. Field inventories and individual-tree models often contain highly-detailed data and allow for long-term complex scenarios comparison, but the information is only at sampled locations and lacks complete spatial coverage. Forest landscape models (FLMs) provide l…					Forest Ecology and Management
	FACING CLIMATE CHANGE IMPACTS ON NATIVE AMERICAN FORESTS	AA Tarancón	2019	Stresses associated with climate change present a challenge to the sustainability of ecological processes and ecosystem structure, especially on Native American lands where research data are limited, and people rely heavily on ecosystem services. This dissertation focuses on understanding fire regimes, changes on forest structure and composition, and expert perceptions on prioritizing ecosystem s…					?Dissertation
	Factors Contributing to Efficient Forest Production in the Region of the Three-North Shelter Forest Program, China	C Wang, X Chu, J Zhan, P Wang, F Zhang, Z Xin	2020	Forests are the most important renewable resources and provide critical ecosystem services worldwide, especially the provisioning service, making a great contribution to human well-being. The Three-North Shelter Forest Program (TNSFP) is a large-scale ecological project aimed at improving ecological environments and consolidating economic construction in China through the development of artificia…					Sustainability
	Farm-Level Microsimulation Modelling	C O'Donoghue	2017	This book, which is the first to be published in the emerging field of farm-level microsimulation, highlights the different methodological components of microsimulation modelling: hypothetical, static, dynamic, behavioural, spatial and macro–micro. The author applies various microsimulation-based methodological tools to farms in a consistent manner and, supported by a set of Stata codes, undertak…					?Book
	Farm-Level Microsimulation Modelling: An updated survey	C O'Donoghue	2017	There has been a growing discipline of farm-level microsimulation modelling that overlaps with the more historic farm-level modelling discipline (Richardson et al., 2014). Micro-simulation is the simulation of policy and economic change on micro-units. Micro-simulation models can be divided methodologically into those dealing with different dimensions of complexity, population, policy, time, spac…					Farm-Level Microsimulation Modelling
	Farming under urban pressure: Farmers' land use and land cover change intentions	E Gomes, P Abrantes, A Banos, J Rocha, M Buxton	2019	Decisions about future land use are complex and involve a wide range of factors. The perceptions, intentions, and interests of the stakeholders involved are usually unpredictable. Different stakeholders manage land by choosing different future options and revealing different expectations. Greater proximity to built-up areas confronts farmers with challenges about future land use and land cover ch…					Applied Geography
2nd round	Financial viability and carbon payment potential of large-scale silvicultural intensification in logged dipterocarp forests in Indonesia	C Romero, FE Putz	2017	To sustain timber yields from selectively logged tropical forests, silvicultural treatments beyond reduced-impact logging are often recommended but seldom implemented outside of research areas. To determine the extent to which financial constraints justify the reluctance of Indonesian forest industries to intensify their silviculture at operational scales, we develop a series of scenarios to comp…	Yes	2 (for which 4 different harvest cycles)	30 years	Dipterocarp forests in Indonesia	Forest Policy and Economics
	Fire behavior in Pinus halepensis thickets: Effects of thinning and woody debris decomposition in two rainfall scenarios	M Palmero-Iniesta, R Domènech, D Molina-Terrén, JM Espelta	2017	Thinning is recommended in overstocked thickets to improve forest structure and reduce high-intensity stand replacing fires. Many studies have outlined the benefits of thinning for forest growth and reproduction but effectiveness in fire intensity needs more attention. Moreover, the effect that slash generated by thinning may have on fire behavior has been seldom explored. Here we simulated fire …					Forest Ecology and Management
	Forest adaptation and transition in the eastern united states under climate change: a forest landscape modeling method	JS Fraser	2018	Forest management is rapidly shifting in focus to address the adaptive capacity of forests under uncertain future climates. Managers and researchers often utilize models to proactively develop strategies for forest adaptation management and in order for these models to provide useful results they must realistically represent a multitude of complex processes. Here we detail a linked-model methodol…					?Dissertation
	Forest bioenergy feedstock in Lithuania–Renewable energy goals and the use of forest resources	X Pang, R Trubins, V Lekavicius, A Galinis, G Mozgeris, G Kulbokas, U Mörtberg	2019	Demands on forest bioenergy feedstock are expected to increase in many countries due to climate change mitigation. However, sustainable use of forest biomass resources can be ensured only if local and landscape conditions are taken into account, linking energy use to its resource base. The aim of this study was to analyse the forest biomass potential for Lithuania's energy pathways, while compari…					Energy Strategy Reviews
	Forest Carbon Supply in Nepal: Evidence from a Choice Experiment	S Dissanayake, RA Bluffstone, E Somanathan, H Luintel, NS Paudel, M Toman	2018	This paper uses a choice experiment conducted in Nepal during 2013 to estimate household-level willingness to participate in a village-level program under the Reduced Emissions from Deforestation and Forest Degradation initiative requiring reductions in fuelwood collection, as a function of the price paid per unit of avoided carbon dioxide emissions. The analysis examines incentives to participat…					?Policy Research Working Papers?
	Forest decision support systems for the analysis of ecosystem services provisioning at the landscape scale under global climate and market change scenarios	EM Nordström, M Nieuwenhuis, EZ Başkent…	2019	Sustainable forest management is driving the development of forest decision support systems (DSSs) to include models and methods concerned with climate change, biodiversity and various ecosystem services (ESs). The future development of forest landscapes is very much dependent on how forest owners act and what goes on in the wider world; thus, models are needed that incorporate these aspects. The…					European Journal of Forest Research
	Forest ecosystem and avian niche modeling: Improving Climate Change Forest Modeling via Interdisciplinary Model Linking	ES Walsh	2019	Climate change is impacting forest structure and processes, and more than half of the forested land cover of North America will experience future climates that differ from historical growing conditions. Forest composition and structure are integral to biodiversity, however, climate change induced declines in tree species occurrence, increases in forest mortality events, and increases in burned ar…					?Dissertation
	Forest governance and international partnerships in the Congo Basin	T Trefon	2017	The Congo Basin is home to the world’s second-largest mosaic of tropical rainforests. These forests are essential to local populations for their livelihoods, and they matter to the international community for harboring biodiversity and potentially contributing to climate change mitigation. Over the past twenty years, international partnerships have played a crucial role in supporting scientific r…					Science & Diplomacy
	Forest governance and management across time: developing a new forest social contract	E Mårald, C Sandstrom, A Nordin	2017						A book
Not available	Forest hydrology modeling	HE Golden, GR Evenson, S Tian, D Amatya, G Sun	2016						Book Chapter
	Forest Landscape Development Scenarios (FoLDS)–A framework for integrating forest models, owners' behaviour and socio-economic developments	GM Hengeveld, E Schüll, R Trubins, O Sallnäs	2017	The FoLDS framework presented in this paper is set up to develop scenarios for forested landscapes with a transparent connection between the broad-scale developments in socio-economic factors and the ecosystem services provided. The forests that provide these ecosystem services are managed by a multitude of forest owners. Different forest owners have their own objectives and will thus adjust thei…					Forest Policy and Economics
Not available	Forest management and future dynamics of the Carpathian forest landscape	I Kruhlov, D Thom, W Keeton, R Scheller, O Chaskovskyy	2018
	FOREST MANAGEMENT CHALLENGES AND OPPORTUNITIES OF TWO-LAYERED BIRCH AND SPRUCE STANDS IN LATVIA	J Vuguls, G Šņepsts, Z Lībiete, P Zālītis	2019	Forestry in Latvia in the 20th century was strongly focused on the establishment and management of pure Scots pine and Norway spruce stands trying to avoid any admixture of other tree species. Knowledge on the economic feasibility of the mixed stands’ management is still rather poor in Latvia, while at the same time the establishment of mixed stands of Norway spruce and birch species has become a…					Research for Rural Development
	Forest management could counteract distribution retractions forced by climate change	L Mair, PJ Harrison, M Räty, L Bärring	2017	Climate change is expected to drive the distribution retraction of northern species. However, particularly in regions with a history of intensive exploitation, changes in habitat management could facilitate distribution expansions counter to expectations under climate change. Here, we test the potential for future forest management to facilitate the southward expansion of an old‐forest species fr…					Ecological Applications
	Forest management for adaptation to climate change in the Mediterranean basin: A synthesis of evidence	A Vilà-Cabrera, L Coll, J Martínez-Vilalta, J Retana	2018	As global climate becomes warmer, the maintenance of the structure and function of Mediterranean forests constitutes a key challenge to forest managers. Despite the need for forest adaptation, an overall evaluation of the efficacy of current management strategies is lacking. Here we describe a theoretical framework for classifying management strategies, explicitly recognizing trade-offs with othe…					Forest Ecology and Management
	Forest Management for Climate Change in New England and the Klamath Ecoregions: Motivations, Practices, and Barriers	RM Scheller, R Parajuli	2018	Understanding perceptions and attitudes of forest managers toward climate change and climate adaptive forest management is crucial, as they are expected to implement changes to forest resource management. We assessed the perceptions of forest managers toward climate adaptive forest management practices through a survey of forest managers working in private firms and public agencies in New England…					Forests
2nd round	Forest management practice for enhancing carbon sequestration in national forests of Korea	H An, HD Seok, SM Lee, J Choi	2019	This paper examines forest management planning and its possible outcomes using linear programing (LP). More specifically, the most appropriate forest harvesting schedule was selected that can maximize the carbon sequestration in the current forest areas considering forest manager’s income. The LP model allows the managers to segment forests into cutting units under rotation basis logging activiti…	Yes	?	50 years	Korea	Forest Science and Technology
	Forest management scenarios and their effects on ecosystem services: some analytical results from Sweden	BC Poudel	2016	Sweden has just more than 23 million hectares of productive forest, which has been actively managed for more than 100 years. This has led to one of the recognized forest products exporting country. Despite the vital role of forests in providing forest products in sustaining various human needs, there is an increasing demand for the inclusion of ecosystem services in forest planning decision makin…					Chapter in a book Society’s steering systems: a Friend book to Inga Carlman
2nd round	Forest management scenarios in a changing climate: trade‐offs between carbon, timber, and old forest	MK. Creutzburg, RM. Scheller, MS. Lucash, SD. LeDuc, MG. Johnson	2016	Balancing economic, ecological, and social values has long been a challenge in the forests of the Pacific Northwest, where conflict over timber harvest and old‐growth habitat on public lands has been contentious for the past several decades. The Northwest Forest Plan, adopted two decades ago to guide management on federal lands, is currently being revised as the region searches for a balance betw…	Yes	4	100 years	Pacific Northwest, Oregon Coast Range	Ecological Applications
	Forest Policy Evaluation in European Countries Using the PROMETHEE Method	S Tsiaras, Z Andreopoulou	2020	The aim of the paper is to evaluate Forest Policy performance in the countries of Europe, using a multiple criteria analysis based on forestry sector data retrieved by Eurostat. Multiple Criteria Decision Analysis is strongly connected with Policy and decision-making, and it can mitigate the uncertainty of planning providing robust solutions, while it is broadly used for agri-environmental issues…					Advances in Operational Research in the Balkans
2nd round	Forest products: contribution to carbon storage and climate change mitigation	G Cardellini	2018	Climate change is one of the biggest threats for our earth. Mitigation of climate change is thus an urgent challenge our society needs to take up. Many benefits are provided by forests, and one is their potential to mitigate climate change. This mitigating effect can be achieved in many ways, for example increasing the stock of carbon in managed forests or replacing more emission-intensive goods …	?	?	?	Europe	?PhD Thesis?
	Forest Reaction to the 2018 Drought: Comparing the Hyltemossa and Rumperöd Forests	E Delin	2019	This paper analyzes the reactions of two forests, located in the same region, to drought conditions that occurred in 2018. Both locations experienced similar conditions including higher temperature and less precipitation than the previous four years. Both experienced drought that would be categorized as moderate according to standard precipitation index calculations and soil moisture values were …					?Bachelor's Thesis?
	Forest Resources Management Using Geospatial Tools (Case study: Northern Nigeria)	AK Usman, AH Abdullahi, J Opara	2020	The present study investigates the reliability of Remote Sensing (RS) and Geographical Information System (GIS) in monitor and management of vegetation resources for sustainable development. Vegetation change is a major environmental problem experienced in different land use types particularly in lands under uncoordinated practices.. Landsat MSS satellite images, Landsat Operational land imager a…					Central Asian Journal of Environmental Science and Technology Innovation
2nd round	Forest sector greenhouse gas emissions sensitivity to changes in forest management in Maine (USA)	JS Gunn, T Buchholz	2018	We used a life cycle greenhouse gas (GHG) accounting tool to test the sensitivity of Maine’s state-wide forest sector GHG emissions to changes in forest management. Inputs included forest cover data and growth and yield models for the state of Maine. We estimated net GHG emissions over 100- and 300-year time horizons of different management strategies across a range of carbon (C) pools and emissi…	Yes	5	100 and 300 years	Maine	Forestry: An International Journal of Forest Research
	Forest tenure reforms and socio-environmental consequences case studies on Guatemala and Nicaragua	IM Monterroso Ibarra	2016	During the last thirty years, legal reforms promoting changes in rules and regulations that govern the appropriation and use of natural resources have resulted in a shift of responsibilities and the recognition of rights to organized groups such as indigenous people and local communities. This formal redefinition of rights among different right holders at various levels has been defined as forest…					?Dissertation
Not available	Forests	G Domke, CA Williams, R Birdsey, J Coulston	2018
	FORests and HYdrology under Climate Change in Switzerland v1. 0: a spatially distributed model combining hydrology and forest dynamics	MJR Speich, M Zappa, M Scherstjanoi, H Lischke	2020	We present FORHYCS (FORests and HYdrology under Climate Change in Switzerland), a distributed ecohydrological model to assess the impact of climate change on water resources and forest dynamics. FORHYCS is based on the coupling of the hydrological model PREVAH and the forest landscape model TreeMig. In a coupled simulation, both original models are executed simultaneously and exchange information…					Geoscientific Model Development
	Forests and Water	D Ellison	2018	We are at a crossroads in time and history that can no longer be avoided. The threats and challenges posed by rapid population growth, climate change and the massive anthropogenic transformations of the terrestrial landscape (Alkama and Cescatti, 2016; Steffen et al., 2015b; Watson et al., 2018, 2016), especially where forests, water and their interaction are concerned, require a far more rapid r…					?Background study prepared for the thirteenth session of the United Nations Forum on Forests
	Forests of the future: ecosystem services in a forest landscape facing significant changes	ER Tew	2019	The natural environment provides a range of benefits to people via ecosystem services. Different types of land management deliver different combinations and amounts of ecosystem services. Traditionally, many landscapes were managed to maximise the delivery of just a few benefits, such as food or timber, but this was often at the expense of other potential benefits, such as carbon sequestration or…					?Dissertation
	From Farms to Forests: Landscape Carbon Balance after 50 Years of Afforestation, Harvesting, and Prescribed Fire	DP Aubrey, JI Blake, SJ Zarnoch	2019	Establishing reliable carbon baselines for landowners desiring to sustain carbon sequestration and identify opportunities to mitigate land management impacts on carbon balance is important; however, national and regional assessments are not designed to support individual landowners. Such baselines become increasingly valuable when landowners convert land use, change management, or when disturbanc…					Forests
Not available	From Understory to Overstory: Critical Studies of Old-Growth Trees and Forests	JC Ryan	2018						Forest Family
Not available	Frontiers for forest conservation: securing the future ecosystem services balance	M Marchetti, L SaLLuStio, M Vizzarri	2018						?Book: Reconnecting Natural and Cultural Capital?
	Future ecosystem services from European mountain forests under climate change	M Mina, H Bugmann, T Cordonnier, F Irauschek, M Klopcic, M Pardos, M Cailleret	2016	1.Ecosystem services (ES ) from mountain forests are highly relevant for human societies. ES with a direct economic support function (e.g. timber production), regulatory services (e.g. protection from natural hazards) and cultural services (e.g. recreation) are likely to be affected strongly by a rapidly changing climate. To evaluate whether adverse climate change effects on ES can be counteracte…					Journal of Applied Ecology
2nd round	Future forest dynamics under climate change, land use change, and harvest in subtropical forests in Southern China	Z Wu, E Dai, Z Wu, M Lin	2019	Context Subtropical forests have and will continue to face tremendous pressure from various disturbances, which have the potential to alter forest composition, structure, and function. Forest dynamics relate to spatial patterns, ecological processes, and their interactions. However, integrating forest ecosystems and land systems has seldom been attempted in southern China. Objectives We explore t…	Yes	7	2010-2050	Southern China	Landscape Ecology
2nd round	Future management options for cembran pine forests close to the alpine timberline	N Jandl, R Jandl, A Schindlbacher	2018	Context Presently, many high-elevation forests in the Alps are managed in order to ensure the provision of ecosystem services with emphasis on the minimization of natural hazards. Aims We studied the possible economic performance of a high-elevation protection forest from an owner’s perspective. We investigated whether the increase in productivity due to climate change and a favorable market for …	Yes	2	100 years	Forests in the Alps	Annals of Forest Research
	Future scenarios for climate mitigation of new construction in Sweden: Effects of different technological pathways	D Peñaloza, M Erlandsson, J Berlin, M Wålinder, A Falk	2018	A variety of climate mitigation strategies is available to mitigate climate impacts of buildings. Several studies evaluating the effectiveness of these strategies have been performed at the building stock level, but do not consider the technological change in building material manufacturing. The objective of this study is to evaluate the climate mitigation effects of increasing the use of biobase…					Journal of Cleaner Production
	Geographical analysis of agro-environmental measures for reduction of chemical inputs in Tuscany	F Riccioli, E Gabbrielli, L Casini, E Marone, JP El Asmar, R Fratini	2019	The agro-environmental policies included in rural development plans are getting increasing importance in European Community strategies. These policies represent the meeting point between demand and supply of positive externalities. The difficulty of assessing real environmental efficiency is one of the elements characterizing agro-environmental measures. This difficulty is related to the identifi…					Natural Resources Research
	Global warming implications from increased forest biomass utilization for bioenergy in a supply-constrained context	KS de Bikuña, R Garcia, AC Dias, F Freire	2020	This article analyzes different forest management strategies to meet the increasing demand of biomass for bioenergy and assesses the resulting global warming implications. Applied to maritime pine forest plantations in Portugal, the assessed strategies are: full harvest of residues (FULL); sustainable and proactive management (SMART); expansion of forest plantations on abandoned farmland (EXP); a…					Journal of Environmental Management
Not available	Governing Forest Supply Chains	CL McDermott	2019						?Book: Smart Mixes for Transboundary Environmental Harm?
Not available	Governing forest supply chains: ratcheting up or squeezing out?	CL McDermott	2019
	Groundwater recharge algorithm for forest management models	F Schwaiger, W Poschenrieder, T Rötzer, P Biber	2018	Multifunctionality is a critical objective in forest management planning. Water related ecosystem services are only sparsely implemented in Forest Management Models (FMM) although water scarcity is highly relevant. This study proposes an approach to integrate groundwater recharge into a FMM. The approach is based on knowledge transfer between two different forest growth models. For site-specific …					Ecological Modelling
	Growth and Yield Models for Uneven-Aged Secondary Forest in IITA, Ibadan, Nigeria	EV Aghimien, JSA Osho, S Hauser, B Deni, VD Ade-Oni, FO Oboite	2016	The development of effective and accurate models to predict forest growth and products is essential for forest managers and planners. Decision-makers need information on the present yield of the forest for the purpose of monitoring growth. Despite the importance of growth and yield models in the determination of appropriate forest management strategies, no study has been undertaken in IITA’s Fore…					Forest Research: Open Access
	HETEROFOR 1.0: a spatially explicit model for exploring the response of structurally complex forests to uncertain future conditions–Part 2: Phenology and …	L Wergifosse, F André, N Beudez, F de Coligny, H Goosse, F Jonard, Q Ponette, H Titeux, C Vincke, M Jonard	2020	Climate change affects forest growth in numerous and sometimes opposite ways, and the resulting trend is often difficult to predict for a given site. Integrating and structuring the knowledge gained from the monitoring and experimental studies into process-based models is an interesting approach to predict the response of forest ecosystems to climate change. While the first generation of models o…					Geoscientific Model Development
	Heterogeneous economic and behavioural drivers of the farm afforestation decision	M Ryan, C O'Donoghue, S Hynes	2018	Using Ireland as a case study, this study examines the economic drivers of the farm afforestation decision for individual farms. Farm incomes and characteristics are observed across the distribution of livestock farmers, using a longitudinal dataset. Potential agricultural and forest income streams are generated and compared in a life-cycle theoretical framework, while the inclusion of attitudina…					Journal of Forest Economics
	How can social acceptability research in Australian forests inform social licence to operate?	RM Ford, KJH Williams	2016	For forest managers, ‘social licence to operate’ involves implicit acceptance and approval of practices by local communities and stakeholders. Based in social relations of trust rather than formal agreements, social licence overlaps with a psychological concept, ‘social acceptability’, which has been used in examining similar issues with a focus on understanding public perspectives on forest mana…					Forestry: An International Journal of Forest Research
2nd round	How considering multiple criteria, uncertainty scenarios and biological interactions may influence the optimal silvicultural strategy for a mixed forest	T Knoke, M Kindu, I Jarisch, E Gosling…	2020	Assessing pre-defined strategies remains the status quo for studies supporting silvicultural decision-making for future forest management, yet, such strategies may not fully address decision-makers' preferences and uncertainty attitudes. We develop a continuous stand-level optimisation approach that integrates multiple decision criteria, uncertain input data based on ellipsoidal uncertainty sets …	Yes	4	120 years	No country; Norway spruce, Silver fir, European beech	Forest Policy and Economics
	How does forest management affect fungal diversity and community composition? Current knowledge and future perspectives for the conservation of forest fungi	A Tomao, JA Bonet, C Castaño, S de-Miguel	2020	The influence of forest management on fungal diversity and community composition has been the subject of a wide number of studies over the last two decades. However, the difficulty of studying the complex kingdom of fungi under real forest conditions has led to rather scattered scientific knowledge. Here, we provide the current state of knowledge suggesting future research directions regarding (i…					Forest Ecology and Management
	How Well Do Stakeholder-Defined Forest Management Scenarios Balance Economic and Ecological Forest Values?	J Eggers, M Räty, K Öhman, T Snäll	2020	Research Highlights: We show the difference in the long-term effects on economic and ecological forest values between four forest management scenarios of a large representative forest landscape. The scenarios were largely formulated by stakeholders representing the main views on how to manage north-European forests. Background and Objectives: Views on how to balance forest management between wood…					Forests
	Hydrological model uncertainty due to spatial evapotranspiration estimation methods	X Yu, A Lamačová, C Duffy, P Krám, J Hruška	2016	Evapotranspiration (ET) continues to be a difficult process to estimate in seasonal and long-term water balances in catchment models. Approaches to estimate ET typically use vegetation parameters (e.g., leaf area index [LAI], interception capacity) obtained from field observation, remote sensing data, national or global land cover products, and/or simulated by ecosystem models. In this study we a…					Computers & Geosciences
	Hydrology of Drained Peatland Forest: Numerical Experiment on the Role of Tree Stand Heterogeneity and Management	L Stenberg, K Haahti, H Hökkä, S Launiainen, M Nieminen, A Laurén, H Koivusalo	2018	A prerequisite for sustainable peatland forestry is sufficiently low water table (WT) level for profitable tree production. This requires better understanding on controls and feedbacks between tree stand and its evapotranspiration, drainage network condition, climate, and WT levels. This study explores the role of spatial tree stand distribution in the spatiotemporal distribution of WT levels and…					Forests
	Hydrology-oriented forest management trade-offs. A modeling framework coupling field data, simulation results and Bayesian Networks	A Garcia-Prats, M González-Sancis, AD Del Campo, C Lull	2018	Hydrology-oriented forest management sets water as key factor of the forest management for adaptation due to water is the most limiting factor in the Mediterranean forest ecosystems. The aim of this study was to apply Bayesian Network modeling to assess potential indirect effects and trade-offs when hydrology-oriented forest management is applied to a real Mediterranean forest ecosystem. Water, c…					Science of the Total Environment
	Impact Analysis of Landscape Level Conservation and Development of Methodologies: A Case Study of Terai Arc Landscape Programme, Nepal	RP Lamsal	2019	Appreciation of the multiple benefits of conservation is incomplete without a comprehensive understanding of their impacts on biodiversity, livelihood and climate change. This study aimed to identify impacts and develop methodologies for monitoring and impact analysis (M&IA) of landscape level conservation (LLC). Four corridors and three bottleneck areas of the Terai Arc Landscape (TAL) programme…					?Dissertation
	Impact of forest management intensity on mushroom occurrence and yield with a simulation-based decision support system	DM Kucuker, EZ Baskent	2017	Well-researched and sound integration of non-wood forest products into a forest management planning process presents an opportunity to understand the fundamental causative basis of forest dynamics through decision support systems (DSS). The aim of this study is to present a simulation-based mushroom integrated decision support system, ETÇAPSimulation model, and forecast the effects of forest mana…					Forest Ecology and Management
	Impact of regional climatic conditions on tree growth on mainland Greece	PP Koulelis, EN Daskalakou, KE Ioannidis	2019	Forest growth is commonly used to explore tree vitality and ability to resist to environmental changes or climatic fluctuations. This paper illustrates and examines how regional climatic conditions can be related to the decline of tree growth, which were found to be more distinct in Quercus frainetto Ten. (Hungarian oak) and Fagus sylvatica L. (European beech) and less pronounced in Abies borissi…					Folia Oecologica
	Impacts of changing coniferous and non-coniferous wood supply on forest product markets: a German scenario case study	F Schier, C Morland, N Janzen, H Weimar	2018	Management strategies which encourage the conversion of coniferous forests to mixed and deciduous stands potentially increase the share of non-coniferous timber in wood supply over the next decades. The objective of this study is to examine possible market impacts from changing wood supply modeled in the German Forest Development and Timber Volume Model (WEHAM) Scenario. Special emphasis is paid …					European Journal of Forest Research
	Impacts of Climate Change on Forests and Water Resources in Switzerland: A Coupled Model-Based Study	MRJ Speich	2018	The aim of this thesis was to develop a coupled simulation model to estimate the impact of climate change on two important ecosystem processes: hydrology and forest dynamics. Both forests and water resources in Switzerland are expected to be impacted by climate change. These effects might have direct socio-economic implications, e.g. through impacts on water availability, flooding, timber product…					?Dissertation
	Impacts of forestry on boreal forests: An ecosystem services perspective	T Pohjanmies, M Triviño, E Le Tortorec, A Mazziotta	2017	Forests are widely recognized as major providers of ecosystem services, including timber, other forest products, recreation, regulation of water, soil and air quality, and climate change mitigation. Extensive tracts of boreal forests are actively managed for timber production, but actions aimed at increasing timber yields also affect other forest functions and services. Here, we present an overvi…					Ambio
	Impacts of global climate change mitigation scenarios on forests and harvesting in Sweden	EM Nordström, N Forsell, A Lundström, A Korosuo, J Bergh, P Haviik, F Kraxner, S Frank, O Fricko, T Lundmark, A Nordin	2016	Under climate change, the importance of biomass resources is likely to increase and new approaches are needed to analyze future material and energy use of biomass globally and locally. Using Sweden as an example, we present an approach that combines global and national land-use and forest models to analyze impacts of climate change mitigation ambitions on forest management and harvesting in a spe…					Canadian Journal of Forest Research
	Implications of future climatic uncertainty on payments for forest ecosystem services: The case of the East Coast of New Zealand	JJ Monge, AJ Daigneault, LJ Dowling, DR Harrison, S Awatere, A-G Ausseil	2018	Forestry’s long-term nature and associated uncertainties play against its consideration in land-use decisions. This study’s objective was assessing the implications of uncertainty on the feasibility of afforesting erodible land with natives. The New Zealand example has global relevance enabling: innovative statistical representation of climatic uncertainty, economic uncertainty analysis due to ex…					Ecosystem Services
	Implications of the reservation price strategy on the optimal harvest decision and production of nontimber goods in an even-aged forest stand	A Susaeta, P Gong, D Adams	2020	This study analyzes the effects of adopting an adaptive harvest strategy in even-aged forest management under timber price uncertainty on the production of nontimber goods. We use the reservation price strategy (“harvest when the observed timber prices are higher than the reservation prices”) on a longleaf pine (Pinus palustris Mill.) stand and employ the Faustmann–Hartman model as a benchmark. W…					Canadian Journal of Forest Research
	Incorporating a Global Perspective Into Future-Oriented Forest Management Scenarios: The Role of Forest Footprint Analysis	PP Koulelis, CL McDermott	2019	This research serves to integrate the concept of an “ecological footprint” into future-oriented forest management scenarios. Scenarios are commonly used to explore stakeholder perceptions of possible forest futures, and are typically focused on the local impacts of different management choices. This article illustrates how global footprint analysis can be incorporated into scenarios to enable loc…					International Journal of Agricultural and Environmental Information Systems
	Incorporating a model for ground lichens into multi-functional forest planning for boreal forests in Finland	J Miina, V Hallikainen, K Härkönen, P Merilä, T Packalen, P Rautio, M Salemaa, T Tonteri, A Tolvanen	2020	The quantitative assessment of forest management impacts on ecosystem services calls for ecological models to be linked to forest planning systems. In these systems, such models are expected to produce valid and accurate predictions to quantify the effects of alternative forest management strategies on ecosystem services. As an example, we present an evaluation of the model for the percent cover …					Fores Ecology and Management
	Incorporating uncertainty into forest management planning: Timber harvest, wildfire and climate change in the boreal forest	CJ Daniel, MT Ter-Mikaelian, BM Wotton, B Raynfield, MJ Fortin	2017	In an effort to ensure the sustainability of their forests, boreal forest managers often use forest planning models to make future projections of timber supply and other key services, such as habitat for wildlife. Projecting the fate of these services has proven to be challenging, however, as major uncertainties exist regarding the principal drivers of boreal ecosystem dynamics, including the fut…					Forest Ecology and Management
	Indicators of sustainable forest management to evaluate the socio-economic functions of coppice in Tuscany, Italy	F Riccioli, R Fratini, E Marone, C Fagarazzi, M Calderisi, G Brunialti	2019	Due to several ecosystem services provided to the community, the multifunctional management of forests has acquired an important role over the years. The current Sustainable Forest Management (SFM) guidelines are based on planning programmes which are able to achieve targets from socio-economic and environmental points of view. In this paper, SFM indicators have been studied and compared to estim…					Socio-Economic Planning Sciences
	Influence of forestry practices cost on financial performance of forestry investments	DW Callaghan, PN Khanal, TJ Straka, DL Hagan	2019	Understanding forestry practices cost is important for predicting the financial outcome of forest management activities. Assessing costs of practices that will be used in the future can be difficult and may result in over or underestimations of financial returns depending on the values used. We used historic real average rates of cost change for the southern United States to assess changes in the…					Resources
	Insects affecting regenerating conifers in Canada: natural history and management	RI Alfaro, A Fuentealba	2016	A number of insect species in a variety of families and orders damage early regenerating forests. Successful management of pests of regenerating forests requires detailed information on the natural history of the damaging organism, including the factors that increase risk, and a careful assessment of the risk mitigation options. Decision support systems, in the form of stand models capable of inc…					The Canadian Entomologist
	Insights into the dynamics of Boletus edulis mycelium and fruiting after fire prevention management	O Mediavilla, M Hernández-Rodríguez, J Olaizola, L Santos-del-Blanco, JA Oria-de-Rueda, P Martín-Pinto	2017	Boletus edulis Bull. is among the most valuable mushroom species worldwide. Cistus ladanifer L. scrublands host an extraordinarily high production of this profitable fungus. Its fructification varies greatly among years depending on factors such as stand age and density along with climatic variables. Important information is missing, however, on the dynamics of this species, particularly at the b…					Forest Ecology and Management
2nd round	Integrated management of forest ecosystem services: An optimization model based on multi-objective analysis and metaheuristic approach	S Sacchelli, I Bernetti	2019	The goal of this research was to implement an optimization model that allows definition of best management strategies in the forest sector. The case study is depicted in a coniferous stand (silver fir—Abies alba Mill.) of Tuscany (central Italy). Four ecosystem services were quantified from biophysical (timber produced, carbon stored, ecosystem diversity, recreational function) and economic (tota…	?	?	?	Silver fir of Tuscany, Italy	Natural Resources Research
	Integrating Forest Ecological Processes, Management, and Carbon Payments to Assess Ecosystem Service Tradeoffs	PY Ling	2016	Due to the current crisis on global warming and species extinction, scientists and economists have proposed to quantify ecosystem goods and services to establish policies that can preserve the ecosystem, provide better livelihood to the local stakeholders, and benefit society. The overarching question for this dissertation study is, ``How to quantify the trade-offs between carbon sequestration, t…					?Dissertation?
	Integrating Forest Policy and Management Practices into a Size-Structured Vegetation Model, FATES-CLM	KJ Murenbeeld, AN Flores, JK Shuman, KE Kaiser	2019	Management plays an important role in the structure and functioning of forest ecosystems and, therefore, potentially in regional and global climate. Yet, forest management exists at the intersection between dynamic biophysical and policy environments. Changes in policy can amplify or alleviate "analysis-paralysis" in natural resource management and the speed at which management plans are implemen…					?American Geophysical Union?
	Integrating life cycle assessment and forest modelling for environmental and economic assessment of forest based bioenergy in Norway	E Soldal	2018	There is a growing interest in bioenergy, both nationally and internationally, due to the increasing emissions of greenhouse gases. The Norwegian forest growing stock is increasing and can be used to produce a range of products which can replace fossil resources. Carbon dioxide (CO2) is the most important of the anthropogenic greenhouse gases and the forest plays an important role in the carbon c…					?Dissertation
	Intensified forestry as a climate mitigation measure–how can it affect critical loads for S and N deposition?	Ø Kaste, RF Wright, S Valinia	2019	More intensive forestry has been proposed in Norway as a climate mitigation measure. Growing forests capture CO2 from the atmosphere and the harvested biomass can comprise a carbon sink. Changes in forestry practices, however, might adversely affect the sensitivity of surface waters to acidification in poorly buffered ecosystems. Increased removal of biomass can accelerate the depletion of base c…					?NIVA-rapport?
	Inter-temporal Microsimulation Model: Forestry Planting Decisions	C O'Donoghue	2017	There are important policy incentives in Ireland to promote land use change for farmers to plant forests on their land. This has been the objective of both developing income diversification opportunities, the development of a forestry value chain and for greenhouse gas mitigation through the development of a carbon sink. Again as in the case of agri-environment schemes, participation in afforesta…					Farm-Level Microsimulation Modelling
	Interdependence of adaptive forest management and ecosystem service provision	F Schwaiger	2019	The thesis at hand contributes to answering questions that arise from the functional interdependence between forest management and ecosystem service provision. I suggest how to regulate mixed species stands in order to achieve a desired set of ecosystem services. Within that scope, I developed an algorithm to assess the important ecosystem service groundwater recharge in dependence of forest mana…					?Dissertation?
	Is biomass accumulation in forests an option to prevent climate change induced increases in nitrate concentrations in the North German Lowland?	S Fleck, B Ahrends, J Sutmöller, M Albert, J Evers…	2017	The North German Lowland is a region with locally high nitrate (NO3−) concentrations in seepage water, inducing an increased susceptibility to the effects of climate change. The future risk of rising NO3− concentrations in seepage water from forests was quantified for four regions in the North German Lowland using climate projections and a modelling system comprising submodels for forest stand de…					Forests
	Is wood pellet-based electricity less carbon-intensive than coal-based electricity? It depends on perspectives, baselines, feedstocks, and forest management practices	P Dwivedi, M Khanna, M Fuller	2019	Some studies suggest that the carbon intensity of electricity generated in the United Kingdom by using imported wood pellets from the southern United States is higher than that of coal-based electricity, whereas other studies suggest that the use of wood pellet-based electricity reduces carbon emissions significantly, relative to coal-based electricity. We developed the Forest Bioenergy Carbon Ac…					Environmental Research Letters
	Issues and perspectives on the use of exotic species in the sustainable management of Canadian forests	BS Rivera, M Barrette, N Thiffault	2016	Plantations offer a high potential to respond to the increasing pressure on forests to deliver social, economic, and environmental services. Exotic tree species have a long history of use in plantation forestry, mostly because of their improved productivity compared with that of native species. Because of their impacts on land management and the environment, questions arise regarding the compatib…					Reforesta
	Lepidopteran forest defoliators in a changing climate: performance in different life-history stages, and range expansion	JJJ Fält-Nardmann	2018	Although there are few confirmed records of rising temperatures contributing to range expansions and range shifts of harmful insects so far, the link between climate and insect distribution range is plausible. Temperature is likely the single most important abiotic factor limiting insect survival. Not only average temperatures but also temperature extremes, such as winter cold spells, may play an…					?Dissertation
	Light Use Efficiency of Aboveground Biomass Production of Norway Spruce Stands	M Bellan, I Marková, A Zaika, J Krejza	2017	Light use efficiency (LUE or photosynthetically active radiation use efficiency) in production of young spruce stands aboveground biomass was determined at the study sites Rájec (the Drahanská vrchovina Highland) and Bílý Kříž (the Moravian‑Silesian Beskids Mountains) in 2014 and 2015. The LUE value obtained for the investigated spruce stands were in the range of 0.45 – 0.65 g DW MJ–1. The differ…					Acta Universitatis Agriculturae et Silviculturae Mendelianae Brunensis
	Linking construction timber carbon storage with land use and forestry management practices	EJ Forster, JR Healey, CC Dymond, G Newman, G Davies, D Styles	2019	Consequential life cycle assessment was applied to forestry systems to evaluate the environmental balance of expanding forestry onto marginal agricultural land to supply more timber for the built environment, accounting for land use effects and product substitution. Forestry expansion to supply timber buildings could mitigate UK greenhouse gas (GHG) emissions by 2.4 Gg CO2 eq. per ha of forest ov…					IOP Conference Series: Earth and Environmental Science
	Linking land use changes to variation in soil properties in a Mediterranean mountain agroecosystem	I Lizaga, L Quijano, L Gaspar, MC Ramos, A Navas	2019	Several decades of intensive rainfed farming in Mediterranean mountains and later land abandonment has led to rapid land use and land cover changes. During recent centuries, the conversion of rangelands into croplands has increased the surfaces prone to erosion. In the southern Pre-Pyrenees, the process was reversed during the middle of the twentieth century, allowing the recovery of vegetation a…					CATENA
	Local Actions to Foster Climate Change Adaptation through Sago Palm Development Initiatives: Examining the Case of South Sulawesi, Indonesia	MA Trisia, AP Metaragakusuma, K Osozawa, H Bai	2016	Indonesia has a great potential supply from its local resources, namely sago palm. It could be an alternative crop because its production is not significantly influenced by climate. This paper interrogates local actions in South Sulawesi Province in promoting sago palm. An Analytic Hierarchy Process (AHP), in-depth interview and observation were used for this study. The findings show that sago pa…					European Journal of Sustainable Development
	Locating Forest Management Units Using Remote Sensing and Geostatistical Tools in North-Central Washington, USA	P Palaiologou, M Essen, J Hogland, K Kalabokidis	2020	In this study, we share an approach to locate and map forest management units with high accuracy and with relatively rapid turnaround. Our study area consists of private, state, and federal land holdings that cover four counties in North-Central Washington, USA (Kittitas, Okanogan, Chelan and Douglas). This area has a rich history of landscape change caused by frequent wildfires, insect attacks, …					Sensors
	Long-term effects of salvage logging on stand composition in seminatural spruce forests	E Bāders, I Silamiķele, O Polyachenko, A Kiviste, K Jõgiste, Āris Jansons	2020	The tree diameter distribution was used to characterize the impact of forest disturbances and the ecosystem dynamics during the process of regeneration in the absence of any management 44 years after the event. In addition, the impact of salvage logging after windthrow remains unknown, especially on long-term responses. In this study, comparisons were made between the “unsalvaged” and “salvaged” …					European Journal of Forest Research
2nd round	Long-term forest carbon storage and structural development as influenced by land-use history and reforestation approach	AR Urbano	2016	Temperate forests are an important carbon sink, yet there is uncertainty regarding land-use history effects on biomass accumulation and carbon storage potential in secondary forests. Understanding long-term biomass dynamics is important for managing forests as carbon sinks and for co-benefits such as watershed protection and biodiversity. However there are many unanswered questions regarding thes…	?	?	2001-2013	Norhteastern U.S. Forests	?Master's Thesis?
	Long-term impact of ditch network maintenance on timber production, profitability and environmental loads at regional level in Finland: a simulation study	H Hökkä, H Salminen, A Ahtikoski, S Kojola, S Launiainen, M Lehtonen	2016	Ditch network maintenance (DNM) is implemented on 60 000 ha annually in Finland to sustain timber productivity on drained peatlands. We investigated how different DNM strategies influence the total ditching area, timber production, financial feasibility, and sediment and nutrient loading in the South-West Finland (SWF) and Northern Ostrobothnia (NO) regions. The National Forest Inventory sample p…					Forestry: An International Journal of Forest Research
2nd round	Long-Term Impacts of China's New Commercial Harvest Exclusion Policy on Ecosystem Services and Biodiversity in the Temperate Forests of Northeast China	K Liu, Y Liang, HS He, WJ Wang, C Huang, S Zong, L Wang, J Xiao, H Du	2018	Temperate forests in Northeast China have been severely exploited by timber harvesting in the last century. To reverse this trend, China implemented the Classified Forest Management policy in the Natural Forest Conservation Program in 1998 to protect forests from excessive harvesting. However, the policy was unable to meet the 2020 commitment of increasing growing stock (set in the Kyoto Protocol…	Yes	3	2010-2100	Northeast China	Sustainability
	Losses of mineral soil carbon largely offset biomass accumulation 15 years after whole-tree harvest in a northern hardwood forest	SP Hamburg, MA Vadeboncoeur, CE Johnson, J Sanderman	2019	Changes in soil carbon stocks following forest harvest can be an important component of ecosystem and landscape-scale C budgets in systems managed for bioenergy or carbon-trading markets. However, these changes are characterized less often and with less certainty than easier-to-measure aboveground stocks. We sampled soils prior to the whole-tree harvest of Watershed 5 at the Hubbard Brook Experim…					Biochemistry
	Losses of mineral soil carbon largely offset biomass accumulation fifteen years after whole-tree harvest in a northern hardwood forest	MA Vadeboncoeur, SP Hamburg, CE Johnson	2019	Changes in soil carbon stocks following forest harvest can be an important component of ecosystem and landscape-scale C budgets in systems managed for bioenergy or carbon-trading markets. However, these changes are characterized less often and with less certainty than easier-to-measure aboveground stocks. We sampled soils prior to the whole-tree harvest of Watershed 5 at the Hubbard Brook Experim…					?University of New Hampshire Scholars' Repository?
	Management Strategies for Wood Fuel Harvesting—Trade-Offs with Biodiversity and Forest Ecosystem Services	J Eggers, Y Melin, J Lundström, D Bergström, K Öhman	2020	Bioenergy is expected to contribute to mitigating climate change. One major source for bioenergy is woody biomass from forests, including logging residues, stumps, and whole trees from young dense stands. However, at increased extraction rates of woody biomass, the forest ecosystem, its biodiversity, and its ability to contribute to fundamental ecosystem services will be affected. We used simulat…					Sustainability
	Managing forests for global and local ecosystem services: A case study of carbon, water and livelihoods from eastern Indonesia	YS Kim, S Latifah, M Afifi, M Mulligan, S Burke, L Fisher, E Siwicka, K Remoundou, M Christie, SM Lopez, J Jenness	2018	Despite a recent increase of interest in global payment for ecosystem services (PES) mechanisms, there has been little comprehensive assessment of PES impacts on ecosystem services (ESs) at smaller scales. Better understanding of localized impacts of global PES can help balance ES deliveries for global benefits with those for meeting landscape and local level needs. Using a case study from easter…					Ecosystem Services
2nd round	Managing mixed stands can mitigate severe climate change impacts on ecosystem functioning	M Jourdan, T Cordonnier, P Dreyfus, C Riond, F de Coligny, X Morin	2020	Climate change affects forest ecosystem processes and related services due to increasing temperature and increasing extreme drought event frequency. This effect can be direct through the alteration of the physiological responses of trees, but also indirect, by modifying interactions between trees and thus changing communities’ composition. Such changes might affect species richness with high impa…	Yes	6	150 years	French Alps	bioRxiv The preprint server for biology
	Managing moist forests of the Pacific Northwest United States for climate positive outcomes	SJ Fain, B Kittler, A Chowyuk	2018	The moist forests of the Pacific Northwest United States (PNW) are among the most naturally carbon rich ecoregions in the world. However, regional in-forest carbon storage levels are currently well below ecological potential. Recent climate policy proposals have renewed and deepened debates over forest sector climate strategies. This paper begins with a review of regionally applicable forest carb…					Forests
	Managing moist temperate forests for bioenergy and biodiversity	HT Root, MG Betts	2016	Demand for bioenergy is expected to triple by 2050 as a result of policies aimed to improve energy independence and mitigate global climate change. We review forest practices that generate biomass in mesic forests and show that they vary widely in intensity and potential magnitude of the effects on biodiversity. Although increased demand for bioenergy may incentivize maintaining forestland, incre…					Journal of Forestry
	Managing the urban colour: similarities and differences between European and Asian strategies	NL Nguyen, J Teller	2017	The information we receive from the urban landscape is triggered and defined by the sense of sight, in other words by visual sensations. Colour is a fundamental component of the visual sensations: it allows us to identify objects with the contrasts that defines the form and it helps to structure the urban environment. As an attribute of the urban morphology, colour informs us about the status and…					?Conference Paper
	Mapping cumulative impacts of mining on sediment retention ecosystem service in an Australian mining region	Z Wang, AM Lechner, T Baumgartl	2018	Mining development can potentially lead to cumulative impacts on ecosystems and their services across a range of scales. Site-specific environmental impact assessments are commonly assessed for mining projects; however, large-scale cumulative impacts of multiple mines that aggregate and interact in resources regions have had little attention in the literature and there are few examples where regi…					Internation Journal of Sustainable Development & World Ecology
	Mapping growing stock volume and biomass carbon storage of larch plantations in Northeast China with L-band ALOS PALSAR backscatter mosaics	T Gao, JJ Zhu, QL Yan, SQ Deng, X Zheng, JX Zhang, GD Shang	2018	Reliable spatial information on growing stock volume (GSV) and biomass is critical for creating management strategies for plantation forests. This study developed empirical models to map the GSV and biomass of larch plantations (LPs) in Northeast China (1.25 million km2 total area) by integrating L-band synthetic aperture radar (SAR) data with ground-based survey data. The best correlation model …					International Journal of Remote Sensing
	Measuring and managing resistance and resilience under climate change in northern Great Lake forests (USA)	MJ Duveneck, RM Scheller	2016	Context Climate change will have diverse and interacting effects on forests over the next century. One of the most pronounced effects may be a decline in resistance to chronic change and resilience to acute disturbances. The capacity for forests to persist and/or adapt to climate change remains largely unknown, in part because there is not broad agreement how to measure and apply resilience conce…					Landscape Ecology
	Meta-analysis reveals that the provision of multiple ecosystem services requires a diversity of land covers	C Gómez-Creutzberg, M Lagisz, S Nakagawa, EG Brockerhoff, JM Tylianakis	2019	Land-use change creates acute trade-offs among ecosystem services that support wellbeing. We comprehensively assess trade-offs and synergies in ecosystem service provisioning across land covers. We systematically surveyed published literature (1970 – 2015) for New Zealand, to quantify 1137 individual land cover - ecosystem services relationships for 473 service provision indicators across 17 serv…					bioRxiv The preprint server for biology
	Methodological uncertainties in estimating carbon storage in temperate forests and grasslands	O Bartholomée, K Grigulis, MP Colace, C Arnoldi, S Lavorel		Carbon sequestration is an essential ecosystem service (ES) for climate change mitigation. For reasons of simplicity this ES is often quantified considering carbon storage in four carbon pools: aboveground biomass, belowground biomass, dead organic matter and soil organic carbon. Indicators of these four pools are estimated by modelling, reference values, or field methods and data processing of d…					Ecological Indicators
	Mitigating midterm timber supply shortage using commercial thinning operations. A case study from British Columbia, Canada	VC Griess, CD Man, AD Polinko, J Spies	2019	Forests in the interior of British Columbia, Canada have seen a substantial change in age class structure caused by a mountain pine beetle outbreak that instigated high tree mortality, and consequently, large scale salvage operations. The current age class structure in affected regions implies a midterm timber supply shortage that has the potential to negatively impact the forest industry in affe…					Forest Ecology and Management
	Modeling height–diameter relationship for Populus euphratica in the Tarim riparian forest ecosystem, Northwest China	T Aishan, Ü Halik, F Betz, P Gärtner, B Cyffka	2016	Modeling height–diameter relationships is an important component in estimating and predicting forest development under different forest management scenarios. In this paper, ten widely used candidate height–diameter models were fitted to tree height and diameter at breast height (DBH) data for Populus euphratica Oliv. within a 100 ha permanent plots at Arghan Village in the lower reaches of the Ta…					Journal of forestry research
	Modeling Sustainable Bioenergy Feedstock Production in the Alps	F Kraxner, S Leduc, G Kindermann, S Fuss, S Pietsch, I Lakyda, H Leon Serrano, D Shchepashchenko, A Shvidenko	2016	Sustainability of bioenergy is often indicated by the neutrality of emissions at the conversion site while the feedstock production site is assumed to be carbon neutral. Recent research shows that sustainability of bioenergy systems starts with feedstock management. Even if sustainable forest management is applied, different management types can impact ecosystem services substantially. This study…					?EGU General Assembly?
2nd round	Modeling the influence of alternative forest management scenarios on wood production and carbon storage: A case study in the Mediterranean region	F Bottalico, L Pesola, M Vizzarri, L Antonello…	2016	Forest ecosystems are fundamental for the terrestrial biosphere as they deliver multiple essential ecosystem services (ES). In environmental management, understanding ES distribution and interactions and assessing the economic value of forest ES represent future challenges. In this study, we developed a spatially explicit method based on a multi-scale approach (MiMoSe-Multiscale Mapping of ecoSys…	Yes	3	20 years	Molise region, Central Italy	Environmental Research
	Modeling the response of daily evapotranspiration and its components of a larch plantation to the variation of weather, soil moisture, and canopy leaf area index	Z Liu, Y Wang, A Tian, AA Webb, P Yu, W Xiong, L Xu, Y Wang	2018	An accurate prediction of forest evapotranspiration (ET) based on its components in response to a changing environment is essential for understanding interactions between the atmosphere, soil, and vegetation and for integrated forest‐water management. The ET components of a pure larch plantation and the environment were monitored over 2 years in northwest China. The response functions of each ET …					Journal of Geophysical Research: Atmospheres
	Modelling financially optimal afforestation and forest management scenarios using a bio-economic model	M Ryan, C O'Donoghue, H Phillips	2016	The expansion of non-industrial private forests (NIPF) in Ireland is unique in the European context in which the almost doubling of forest cover within the last thirty years has taken place largely on farmland. This is not surprising as Ireland has some of the highest growth rates for conifers in Europe and also has a large proportion of land which is marginal for agriculture but highly productiv…					Open Journal of Forestry
2nd round	Modelling forest carbon stock changes as affected by harvest and natural disturbances. II. EU-level analysis	R Pilli, G Grassi, WA Kurz, JV Moris…	2016	Forests and the forest sector may play an important role in mitigating climate change. The Paris Agreement and the recent legislative proposal to include the land use sector in the EU 2030 climate targets reflect this expectation. However, greater confidence on estimates from national greenhouse gas inventories (GHGI) and more comprehensive analyses of mitigation options are needed to seize this …	Yes	3	2000-2012	EU	Carbon Balance and Management
	Modelling past, present and future Ecosystem Services supply in a protected floodplain under land use and climate changes	M Gaglio, V Aschonitis, L Pieretti, L Santos, E Gissi, G Castadelli, EA Fano	2019	The understanding of protection initiatives’ effects on the delivery of Ecosystem Services (ESs) is of paramount importance to attain sustainable management in Protected Areas (PAs). Protected floodplains provide important ESs to local populations such as water flow regulation and climate regulation through carbon storage. This study investigates the effects of biodiversity protection initiatives…					Ecological Modelling
	Modelling the effect of accelerated forest management on long-term wildfire activity	AA Ager, AMG Barros, R Houtman, R Seli, MA Day	2020	We integrated a widely used forest growth and management model, the Forest Vegetation Simulator, with the FSim large wildfire simulator to study how management policies affected future wildfire over 50 years on a 1.3 million ha study area comprised of a US national forest and adjacent lands. The model leverages decades of research and development on the respective forest growth and wildfire simul…					Ecological Modelling
2nd round	Modelling the impacts of intensifying forest management on carbon budget across a long latitudinal gradient in Europe	A Akujärvi, A Shvidenko…	2019	Global wood demand is projected to increase with accompanying intensification in forest management practices. There are concerns that intensive management practices such as whole-tree harvest (WTH) and shortened rotation lengths could risk the long-term productivity and carbon sink capacity of forest ecosystems. The historical (1915–2005) and future (2005–2095) development of five Scots pine (Pin…	Yes	?	2005-2095	Europe; Scots pine and Norway spruce	Environmental Research Letters
	Modelling water yields in response to logging and Representative Climate Futures	C Taylor, D Blair, H Keith, D Lindenmayer	2019	Natural and human disturbance along with climate change pose major challenges for resource management. This is relevant in natural forests, where conflict can occur between water provision and industrial logging. As a result, conversion of old forests to young, fast-growing stands through logging can dramatically reduce streamflow and water yield. We modelled changes in stream run-off and hence w…					Science of The Total Environment
	Moderate thinning increases soil organic carbon in Larix principis-rupprechtii (Pinaceae) plantations	J Ma, F Kang, X Cheng, H Han	2018	Forest thinning management practices such as thinning play a major role in the process of soil organic carbon (SOC) sequestration, however, the mechanism for SOC variations is still unclear. The objectives of this study were to estimate SOC stock and its active chemical components following a short term density adjustment of stand woods. Three treatments, low intensity thinning (removal of 15% of…					Geoderma
	Modified forest rotation lengths: Long-term effects on landscape-scale habitat availability for specialized species	JM Roberge, K Öhman, T Lämås, A Felton, T Ranius, T Lundmark, A Nordin	2018	We evaluated the long-term implications from modifying rotation lengths in production forests for four forest-reliant species with different habitat requirements. By combining simulations of forest development with habitat models, and accounting both for stand and landscape scale influences, we projected habitat availability over 150 years in a large Swedish landscape, using rotation lengths whic…					Journal of Environmental Management
	Mountain ecosystem services affected by land use changes and hydrological control works in Mediterranean catchments	C Boix-Fayos, LGJ Boerboom, R Janssen…	2020	The use of check-dams in mountain environments to regulate fluxes of water and sediments is widely applied across Mediterranean mountains. Besides the use of “grey infrastructures” such as check-dams, other restoration and hydrological control measures rely more on the use of “green infrastructures” or “nature-based solutions” (e.g. reforestation, buffer lines) or a combination of both types of m…					Ecosystem Services
	Multi-level planning and conflicting interests in the forest landscape	O Stjernström, R Ahas, S Bergstén, J Eggers…	2017	This chapter describes and analyses overlapping planning structures and multi-level planning issues and how they affect current land use and management in the forest landscape. Forest land use in Sweden is based on a large proportion of privately owned forests with the primary purpose of producing timber for the forest industries. Nevertheless, the forests are also characterised by multiple uses …					Globalisation and Change in Forest Ownership and Forest Use
	Multifunctionality of forests: A white paper on challenges and opportunities in China and Germany	JP Benz, S Chen, S Dang, M Dieter, ER Labelle, G Liu…	2020	Both in Germany and in China, there is strong expertise regarding the different aspects of forest management, as well as forest products management. Nevertheless, forestry in both countries is facing challenges, some of which are regional, but many of which are shared. Therefore, experts from both countries (Technical University of Munich Germany; Northwest A&F University Yangling, China; Forestr…					Forests
	MUPOM: A multi-criteria multi-period outranking method for decision-making in sustainable development context	A Frini, SB Amor	2019	This article aims to support decision-making in sustainable development context, which must guarantee a long-term balance between environmental integrity, social equality and economic efficiency. It proposes a temporal outranking method, named MUPOM (MUlti-criteria multi-Period Outranking Method), which accommodates the requirements of sustainable development and demonstrates how the paradigm beh…					Environmental Impact Assessment Review
	Naturalness Assessment of Forest Management Scenarios in Abies balsamea–Betula papyrifera Forests	S Côté, L Bélanger, R Beauregard, É Thiffault, M Margni	2020	Research Highlights: This research provides an application of a model assessing the naturalness of the forest ecosystem to demonstrate its capacity to assess either the deterioration or the rehabilitation of the ecosystem through different forest management scenarios. Background and Objectives: The model allows the assessment of the quality of ecosystems at the landscape level based on the condit…					Forests
	Net climate impacts of forest biomass production and utilization in managed boreal forests	A Kilpeläinen, P Torssonen, H Strandman	2016 (first published 2014)	In this work, we studied the potentials offered by managed boreal forests and forestry to mitigate the climate change using forest‐based materials and energy in substituting fossil‐based materials (concrete and plastic) and energy (coal and oil). For this purpose, we calculated the net climate impacts (radiative forcing) of forest biomass production and utilization in the managed Finnish boreal f…					Global Change Biology BIOENERGY
	New geospatial approaches for efficiently mapping forest biomass logistics at high resolution over large areas	J Hogland, N Anderson, W Chung	2018	Adequate biomass feedstock supply is an important factor in evaluating the financial feasibility of alternative site locations for bioenergy facilities and for maintaining profitability once a facility is built. We used newly developed spatial analysis and logistics software to model the variables influencing feedstock supply and to estimate and map two components of the supply chain for a bioene…					ISPRS International Journal of Geo-Information
	Nitrogen fertilization reduces wild berry production in boreal forests	G Granath, J Strengbom	2017	Nitrogen is the main limiting nutrient in temperate and boreal forests. Large-scale nitrogen fertilization has been suggested as a potential tool to enhance production and meet the increasing demand for wood products and biofuels. Here, we test the effect of N fertilization and thinning on berry (i.e., fruit) production and incidence of fungal pathogens along a latitudinal gradient in Sweden. We …					Forest Ecology and Management
	Nudging service providers and assessing service trade-offs to reduce the social inefficiencies of payments for ecosystem services schemes	BD Matthies, T Kalliokoski, K Eyvindson	2016	Socially inefficient payment for ecosystem services (PES) schemes result when adverse shifts in the provisioning of other ecosystem services (ES) or overpayment to service providers occur. To address these inefficiencies, a holistic evaluation of trade-offs between services should be conducted in parallel with determining land owners’ service provisioning preferences. Recent evidence also suggest…					Environmental Science and Policy
	On the environmental and economic issues associated with the forestry residues-to-heat and electricity route in Chile: Sawdust gasification as a case study	Y Casas-Ledón, M Flores, R Jiménez, F Ronsse, J Dewulf, LE Arteaga-Pérez	2019	The present study reports on the technical, economic and environmental analysis of small-scale gasification-ICE systems integrated into sawmills in Chile. Two scenarios were considered, (i) a 100 kWe system for self-consumption in a sawmill and (ii) a 1000 kWe system for using residues from different sawmills. The gasification system was technically assessed by a comprehensive mathematical model …					Energy
	On the realistic contribution of European forests to reach climate objectives	G Grassi, A Cescatti, R Matthews, G Duveiller, A Camia, S Federici, J House, N de Noblet-Ducoudré, R Pilli, M Vizarri	2019	A recent article by Luyssaert et al. (Nature 562:259–262, 2018) analyses the climate impact of forest management in the European Union, considering both biogeochemical (i.e., greenhouse gases, GHG) and biophysical (e.g., albedo, transpiration, etc.) effects. Based on their findings, i.e. that additional net overall climate benefits from forest management would be modest, the authors conclude that…					Carbon Balance and Management
2nd round	Optimal strategies for integrated forest management in megacities combined with wood and carbon services	H Li, G Liu, Y Liu, Y Zhu, X Yang	2019	Based on a simulated annealing algorithm, this study empirically determined the optimal stand-level forest management strategies for the Miyun Reservoir Catchment (MRC), the important protective screen and ecosystem service provider for Beijing City. The optimization results of wood provisioning indicate that the objective yield can be more effectively and sustainably attained over longer plannin…	Yes	3	50-100 years	Beijing City	Journal of Cleaner Production
	Optimizing continuous cover and rotation forestry in mixed-species boreal forests	VP Parkatti, O Tahvonen	2020	We study the management of mixed-species boreal forests and tree species composition in a stand-level economic-ecological, size-structured model. The model includes ecological tree species interaction, a detailed harvesting cost module, optimal harvest timing, and optimization between continuous cover and rotation forestry. Optimization is solved applying a tri-level structure, in which the optim…					Canadian Journal of Forest Research
	Overview of the PlanWise application and examples of its use	J Eggers, K Öhman	2020	There are many demands on forests today, such as producing wood and bioenergy, maintaining biodiversity, providing attractive recreational settings, and mitigating climate. These objectives are partly in conflict with each other, and management strategies differ in how much they contribute to each of these objectives. Therefore, there is a need to assess the long-term consequences of different ma…					?Department of Forest Resource Management, Swedish University of Agricultural Sciences
	Owner mapping for forest scenario modelling—A Lithuanian case study	G Mozgeris, V Brukas, A Stanislovaitis, M Kavaliauskas, M Palicinas	2017	Ample research on private forest owners (PFOs) has established high heterogeneity in owners' objectives, motivations and management decisions. Such heterogeneity is, however, rarely taken into account in forest scenario modelling. This study, in contrast, conducts a detailed forest owner mapping that feeds into simulations of ecosystem services (ES) under alternative future scenarios. First, we i…					Forest Policy and Economics
	Patterns of biomass, carbon, and soil properties in masson pine (Pinus massoniana Lamb) plantations with different stand ages and management practices	A Ali, A Ahmad, K Akhtar, M Teng, W Zeng, Z Yan, Z Zhou	2019	Masson pine (Pinus massoniana Lamb) has been planted extensively in different parts of China for timber production and habitat restoration. The effects of stand age and management of these plantations on biomass, carbon storage, and soil physicochemical properties are poorly understood. In this study, we investigated biomass, carbon storage, and soil physicochemical properties of Masson pine plan…					Forests
	Policy forum: Shifting cultivation and agroforestry in the Amazon: Premises for REDD+	PM Villa, SV Martins, SN de Oliveira Neto, AC Rodrigues, EP Hernández, D-G Kim	2020	Evidence shows that there is a close link between the intensification of shifting cultivation (SC) and the Amazon forest resilience. However, SC, to this day, is a widely implemented agricultural practice around the Amazon region due to its cultural, social, and economic relevance. In pristine indigenous communities, which have not experienced Western influence, SC will continue to be the main li…					Forest Policy and Economics
2nd round	Potential greenhouse gas reductions from Natural Climate Solutions in Oregon, USA	RA Graves, RD Haugo, A Holz, M Nielsen-Pincus…	2020	Increasing concentrations of greenhouse gases (GHGs) are causing global climate change and decreasing the stability of the climate system. Long-term solutions to climate change will require reduction in GHG emissions as well as the removal of large quantities of GHGs from the atmosphere. Natural climate solutions (NCS), i.e., changes in land management, ecosystem restoration, and avoided conversi…	Yes	3	2020-2050	Oregon, USA	PLOS one
	Predicting the effects of urban development on land transition and spatial patterns of land use in Western Peninsular Malaysia	R Nourqolipour, ARBM Shariff, SK Balasundram, NB Ahmad, AM Sood, T Buyong	2016	Analyzing the effects of urban development on dynamic and spatial patterns of land use is vital to establish more efficient land management policies. However, in Malaysia, such effects are usually explained without quantitative metrics. This research quantified the future impact of urban expansion on the dynamic of land use by developing the area-independent dynamic metric. The metric was calcula…					Applied Spatial Analysis and Policy
	Predicting volume distributions of hardwood sawn products by tree grade in eastern Canada	S Bédard, I Duchesne, F Guillemette…	2018	Northern hardwoods are an ecologically and economically important forest type in eastern North America. Historically, the hardwood supply came from old-growth forests dominated by large-diameter trees. Unfortunately, the repeated removal of high-quality trees has substantially degraded hardwood forests and reduced the profitability of the primary manufacturing sector. In this context, forest mana…					Forestry: An International Journal of Forest Research
	Predictive analytics of tree growth based on complex networks of tree competition	D Mongus, U Vilhar, M Skudnik, B Žalik, D Jesenko	2018	Competition between individual trees is a major factor influencing the development of forests. However, due to the complexity of such interactions, that span over vast geographic areas, systematic analysis of competition has only recently become possible through the concepts of so-called predictive analytics. The rationale behind the utilised approach is that a prediction model, which is capable …					Forest Ecology and Management
No access	Preparing forest management plans with spatial simulation model.	Aİ Kadıoğulları, S Keleș, EZ Bașkent…	2016
	Presenting MASSIMO: A Management Scenario Simulation Model to Project Growth, Harvests and Carbon Dynamics of Swiss Forests	G Stadelmann, C Temperli, B Rohner, M Didion…	2019	Forest development models have been used to predict future harvesting potentials and forest management reference levels under the Kyoto guidelines. This contribution aims at presenting the individual-tree simulator MASSIMO (MAnagement Scenario SImulation Model) and demonstrating its scope of applications with simulations of two possible forest management reference levels (base or business as usua…					Forests
	Price Impact Analysis of Increased Biofuel Production on Forest Feedstock Markets: A Spatial Explicit Approach for Sweden	I Ouraich, R Lundmark, F Nicklas	2017	This paper introduces a model of price determination to analyze the impacts of increased biofuel production on forest feedstocks markets in Sweden. The model is based on a spatially-explicit, demand-supply framework. Data on forest biomass supply and harvest cost at the gridcell level is available for Sweden for 334 0.5x0.5 degree gridcells. We use the data to construct supply curves, both at the…					?Conference Paper
	Prioritizing abandoned mine lands rehabilitation: combining landscape connectivity and pattern indices with scenario analysis using land-use modeling	L Zhang, S Zhang, Y Huang, A Xing, Z Zhuo, Z Sun, Z Li, M Cao, Y Huang	2018	Connectivity modeling approaches for abandoned mine lands (AML) patches are limited in post-mining landscape restoration, especially where great land use changes might be expected due to large-scale land reclamation. This study presents a novel approach combining AML patch sizes with a proximity index to characterize patch-scaled connectivity for determining the spatial positions of patches with …					ISPRS International Journal of Geo-Information
Not available	Process-based models: a synthesis of models and applications to address environmental and management issues	GR Larocque, A Komarov, O Chertov	2016						?Ecological Forest Management Handbook?
	Projected effects of climate change on boreal bird community accentuated by anthropogenic disturbances in western boreal forest, Canada	P Cadieux, Y Boulanger, D Cyr, AR Taylor, DT Price, P Sólymos, D Stralberg, HYH Chen, A Brecka, JA Tremblay	2020	Aim Climate change is expected to influence boreal bird communities significantly, notably through changes in forest habitat (composition and age structure), in the coming decades. How these changes will accumulate and interact with anthropogenic disturbances remains an open question for most species. Location Northeastern Alberta, Canada. Methods We used the LANDIS‐II forest landscape model to p…					Biodiversity Research
	Projecting biodiversity and wood production in future forest landscapes: 15 key modeling considerations	A Felton, T Ranius, JM Roberge, K Öhman, T Lämås, J Hynynen, A Juutinen, M Mönkkönen, U Nilsson, T Lundmark, A Nordin	2017	A variety of modeling approaches can be used to project the future development of forest systems, and help to assess the implications of different management alternatives for biodiversity and ecosystem services. This diversity of approaches does however present both an opportunity and an obstacle for those trying to decide which modeling technique to apply, and interpreting the management implica…					Journal of Environmental Management
	Projecting the Spatial Distribution of Possible Planted Forest Expansion in the United States	CM Wade, JS Baker, G Latta, SB Ohrel, J Allpress	2019	As the demand for forest products and carbon storage in standing timbers increases, intensive planting of forest resources is expected to increase. With the increased use of plantation practices, it is important to understand the influence that forest plot characteristics have on the likelihood of where these practices are occurring. Depending on the goals of a policy or program, increasing fores…					Journal of Forestry
	PROTEST project: towards a multidisciplinary methodology for forest territorial analysis	R Aussenac, JM Monnet, T Carrette, S Durrieu, P Paccard, C Riond, A Sergent, P Vallet	2019	In French mountain areas, the heterogeneity of forests, the fragmentation of ownership and accessibility constraints hamper inventory and management actions. To ensure the sustainability of ecosystem services provided by forests, it is necessary to evaluate them while taking into account the local and global socio-economic context. The PROTEST project aims to build a methodology for territorial a…					?IUFRO World Congress?
	Quantification and comparison of the economic and GHG performance of biomass supply chains	JGG Jonker	2017	There is a widespread scientific consensus that global climate change is caused by the increased levels of anthropogenic greenhouse gasses (GHG). Biomass use is seen as an important GHG mitigation option. However, the use of biomass will not by default generate a significant and timely GHG emission reduction compared to the fossil reference. The GHG emission reduction potential has recently been …					?Dissertation
	Quantifying the Environmental Performance of a Stream Habitat Improvement Project	C Morse	2018	River restoration projects are being installed worldwide to rehabilitate degraded river habitat. Many of these projects focus on stream habitat improvement (SHI), and an estimated 60%of the 37,000 projects listed in the National River Restoration Science Synthesis Program focus on SHI for salmon and trout species. These projects frequently lack a sufficient monitoring program or account for the e…					?Master's Thesis?
	Quantifying the implications of different land users' priorities in the management of boreal multiple-use forests	T Horstkotte, T Lind, J Moen	2016	In the management of natural resources, conflicting interests and objectives among different stakeholders often need to be considered. Here, we examine how two contrasting management scenarios of boreal forests in northern Sweden differ in their consequences on forest structural composition and the economic gains at harvest. Management strategies prioritize either (i) forest characteristics that …					Environmental Management
2nd round	Quantifying the missing link between forest albedo and productivity in the boreal zone	A Hovi, J Liang, L Korhonen, H Kobayashi, M Rautiainen	2016	Albedo and fraction of absorbed photosynthetically active radiation (FAPAR) determine the shortwave radiation balance and productivity of forests. Currently, the physical link between forest albedo and productivity is poorly understood, yet it is crucial for designing optimal forest management strategies for mitigating climate change. We investigated the relationships between boreal forest struct…	?	?	?	Finland and Alaska	Biogeosciences
	Recovery of carbon stocks after wildfires in boreal forests: a synthesis	M Palviainen, F Berninger, K Köster, J Pumpanen	2018						Conference programme
2nd round	Regional effects of alternative climate change and management scenarios on timber production, economic profitability, and carbon stocks in Norway spruce forests in Finland	A. Zubizarreta-Gerendiain, J. Garcia-Gonzalo, H. Strandman, K. Jylhä, H. Peltola	2016	We studied regional effects of alternative climate change and management scenarios on timber production, its economic profitability (net present value (NPV), with 2% interest rate), and carbon stocks over a 90 year simulation period in Norway spruce (Picea abies (L.) Karst.) forests located in southern, central, and northern Finland. We also compared the results of optimised management plans (max…	Yes	?	90 years	Norway spruce in southern, central and northern Finland	Canadian Journal of Forest Research
	Reindeer husbandry in a mountain Sami village in boreal Sweden: the social and economic effect of introducing GPS collars and adaptive forest management	E Valinger, S Berg, T Lind	2018	Reindeer husbandry in northern Sweden, Norway, and Finland is an extensive agroforestry system, and the management of reindeer occurs alongside other land uses such as forestry, hunting, and tourism. The economic, social, and environmental impact of using GPS collars to track the reindeer was evaluated in the Sami village of Njaarke in boreal Sweden. A second objective was to evaluate how adapted…					Agroforestry Systems
	Relations between forestry and reindeer husbandry in northern Finland–perspectives of science and practice	MT Turunen, S Rasmus, J Järvenpää, S Kivinen	2020	The overlapping land use of reindeer husbandry and forestry – both important livelihoods in the boreal forest zone in northern Finland – has led to disputes between the two land use forms for over a hundred years. For the purposes of this study, we conducted a literature review on the impacts of forestry on reindeer husbandry and the impacts of reindeer husbandry on forestry. We examined reindeer…					Forest Ecology and Management
	Resolving variables influencing the residence time of biomass in the old-age forest across climate gradients	Y Han, W Wang, W Zhang, J Zhang, D Shan	2018	Standing biomass stocks represent a balance between a number of processes that lead to biomass accumulation or to biomass loss. The average time of biomass residence (ATr) of an ecosystem is the average period of time that carbon is locked up in the living biomass before it is transferred to the litter pool and is an important variable influencing the process leading to biomass loss. Variation in…					Forests
	Review of Methods to Quantify Trade-offs among Ecosystem Services and Future Model Developments	W Baiqiu, W Junbang, Q Shuhua, W Shaoqiang, L Yingnian	2019	Ecosystem services are spatially heterogeneous and temporal variability, which results in trade-offs, synergies and neutrality. The trade-off is a key problem in ecosystem management and requires optimized decision-making research. This paper reviews methods for identifying trade-offs and suggest future model developments. We conclude that (1) ecosystem service assessment depends on quantitative …					Journal of Resurces and Ecology
	Rewetting offers rapid climate benefits for tropical and agricultural peatlands but not for forestry‐drained peatlands	P Ojanen, K Minkkinen	2020	Abstract Peat soils drained for agriculture and forestry are important sources of carbon dioxide and nitrous oxide. Rewetting effectively reduces these emissions. However, rewetting also increases methane emissions from the soil and, on forestry‐drained peatlands, decreases the carbon storage of trees. To analyze the effect of peatland rewetting on the climate, we built radiative forcing scenario…					Global Biogeochemical Cycles
2nd round	Scenario analysis using carbon budget modelling for alternative forest management strategies in Turkey: the case study of Arikaya	E Satir	2017	Increasing carbon stock in forests is fundamental for climate change mitigation. Forest carbon management can also play a critical role in keeping forests healthy, while addressing multiple wildlife and human needs. To fulfill this potential, forest management practices require an improved understanding of annual carbon stocks and carbon dynamics. However, this information is oftentimes not prope…	Yes	3	100 years	Turkey	Thesis / Dissertation
	Scenario planning with linked land-sea models inform where forest conservation actions will promote coral reef resilience	JMS Delevaux, SD Jupiter, KA Stamoulis, LL Bremer, AS Wenger, R Dacks, P Garrod, KA Falinski, T Ticktin	2018	We developed a linked land-sea modeling framework based on remote sensing and empirical data, which couples sediment export and coral reef models at fine spatial resolution. This spatially-explicit (60 × 60 m) framework simultaneously tracks changes in multiple benthic and fish indicators as a function of land-use and climate change scenarios. We applied this framework in Kubulau District, Fiji, …					Scientific Reports
	Scenario planning, a new planning tool for the US Pacific Northwest forest academy	RS Portugal	2019	Human society is in continuous movement, physically or politically, willing or not . With digitalization and global warming, the pace of change has increased, and unpredictability has grown, challenging society and its institutions to evolve within a highly globalized and interactive environment, while facing even higher uncertainty in the future. Around the globe, all segments of human activity …					?Master's Thesis?
	Searching for Pareto Fronts for Forest Stand Wind Stability by Incorporating Timber and Biodiversity Values	J Merganič, K Merganičová, J Výbošťok, P Valent, J Bahýl, R Yousefpour	2020	Selecting a variant of forest regeneration cuttings that would ensure fulfilling multiple, frequently conflicting forest functions is a challenging task for forest management planning. The aim of this work is to present an efficient and complex analysis of the impact of different forest management scenarios on stand wind stability, timber production (economy), and biodiversity of a secondary mixe…					Forests
2nd round	Sensitivity of 21st century simulated ecosystem indicators to model parameters, prescribed climate drivers, RCP scenarios and forest management actions for two Finnish boreal forest sites	J Makela, F Minunno, T Aalto, A Makela, T Markkanen, M Peltoniemi	2020	Forest ecosystems are already responding to changing environmental conditions that are driven by increased atmospheric CO2 concentrations. These developments affect how societies can utilise and benefit from the woodland areas in the future, be it for example climate change mitigation as carbon sinks, lumber for wood industry, or preserved for nature tourism and recreational activities. We assess…	Yes	2+	1980-2100	Two boreal forest sites Hyytiälä and Sodankylä in Finland	Biogeosciences
	Sensitivity of snow cover dynamics and associated surface energy fluxes to boreal forest management.	S Eisner, J Magnusson, R Essery	2019	In Fennoscandia, forestry is one of the main drivers of land cover/management change and the region is characterized by large-scale transitions in forest structure over the past century. The long-lasting snow cover is a major determinant of land-atmosphere exchange of energy and water in the boreal zone and structural forest characteristics such as stand density or species composition are known t…					?Geophysical Research Abstracts?
2nd round	Shifting from even-aged management to less intensive forestry in varying proportions of forest land in Finland: Impacts on carbon storage, harvest removals and harvesting costs	J Vauhkonen, T Packalen	2019	Many studies have reported increased multi-functionality and financial profits due to a shift from even- to uneven-aged forest management. However, little is known (from long-term experiences or predictions) how alternative management systems could affect national-scale wood production and carbon storage, if adopted over very large areas. We analysed these effects using an area-based framework, i…	?	?	?	Finland	European Journal of Forest Research
No access	Shifting Public Land Paradigms: Lessons from the Valles Caldera National Preserve	MH Benson	2016						Virginia Environmental Law Journal
	Silvicultural strategies for increased timber harvesting in a Central European mountain landscape	C Temperli, G Stadelmann, E Thürig, P Brang	2017	The demand for wood as construction material, renewable source for energy and feedstock for chemicals is expected to increase. However, timber increments are currently only partly harvested in many European mountain regions, which may lead to supply shortages for local timber industries, decreases in forest resistance to disturbances and functioning as protection from gravitational hazards. Using…					European Journal of Forest Research
	Snag dynamics in northern hardwood forests under different management scenarios	KS Fassnacht, TW Steele	2016	Snag retention is increasingly being incorporated into forest management guidelines. Questions remain, however, in northern hardwood systems regarding factors affecting retention in actively managed stands, the effectiveness of snag creation, and the net effects of snag creation and timber harvesting on snag numbers and sizes. To address some of these questions, we examined the dynamics of natura…					Forest Ecology and Management
	Socio-economic drivers of farm afforestration decision-making	M Ryan, C O'Donoghue	2016	The decision to convert land from agriculture to forestry has previously been considered in a number of studies which have variously assessed attitudinal and economic factors affecting the afforestation decision. However, none of these studies has fully taken into account the heterogeneity of individual farms in Ireland, particularly in terms of farm and farmer characteristics. This review paper …					Irish Forestry Journal
	Soil heterotrophic respiration: Measuring and modeling seasonal variation and silvicultural impacts	R Brown, D Markewitz	2018	To determine the effectiveness of forests in sequestering atmospheric carbon (C), we must know the amount of fixed carbon dioxide (CO2) that is subsequently lost due to heterotrophic microbial activity in the soil. Furthermore, the heterotrophic proportion of total soil respiration (Rs) must be quantified as it changes between different physiographic regions, seasons, and silvicultural treatments…					Forest Ecology and Management
	Soil Microbial Ecology and Its Role in Soil Carbon Sequestration in Sustainable Agroecosystems Under Climate Change	JA Cardoso Filho, GAL Junior	2020	To help the sustainable intensification of food production systems, and minimize the levels of the greenhouse gases anthropogenic emissions, the current agriculture needs to create and use methodologies (e.g., soil carbon sequestration) that minimize loss of terrestrial biodiversity on agroecosystems. The development of the soil microbial ecology in the last 30 years are related to the role of so…					Carbon and Nitrogen Cycling in Soil
	Solving Multi-Objective Problems for Multifunctional and Sustainable Management in Maritime Pine Forest Landscapes	F Pérez-Rodríguez, L Nunes, JC Azevedo	2018	Forest management based on sustainability and multifunctionality requires reliable and user-friendly tools to address several objectives simultaneously. In this work we present FlorNExT Pro®, a multiple-criteria landscape-scale forest planning and management computer tool, and apply it in a region in the north of Portugal to find optimized management solutions according to objectives such as maxi…					Climate
	Space use and foraging patterns of the white-headed woodpecker in western Idaho	AR Kehoe	2017	The white-headed woodpecker (Picoides albolarvatus) is a species of conservation concern that is strongly associated with ponderosa pine (Pinus ponderosa)-dominated forests in the Inland Northwest. More information on home range size and habitat selection patterns is needed to inform conservation of the white-headed woodpecker, a focal management species for dry-forest restoration treatments. We …					?Master's Thesis?
	Spatial analysis of selected biodiversity features in protected areas: a case study in Tuscany region	F Riccioli, R Fratini, F Boncinelli	2016	The development of strategies for biodiversity analysis is critical at several levels, particularly at the national one. The World Conference on Biological Diversity held in Rio de Janeiro in 1992, the European Natura 2000 network and the Environmental Conference of the Regions of Europe (EN.CO.RE) brought forward several measures aiming at the preservation of Biodiversity. Targets for biodiversi…					Land Use Policy
	Spatial component for the decision support systems of Colorado's forest products industry-industry cluster analysis on sawmills in northern Colorado	EA Richardson	2016	The Colorado State Forest Service (CSFS) has received numerous requests for a resource that provides a consolidated, up-to-date spatial representation of facilities and contractors associated with Colorado's forest products industry (CFPI). The overall purpose of this project was to provide methods for creating the spatial component to be used in the decision support systems (DSS) of CFPI. The sp…					?Master's Thesis?
	Spatial forest valuation: The role of location in determining attitudes toward payment for ecosystem services policies	J Felardo, CD Lippitt	2016	Forests provide many benefits (e.g., esthetics, water purification, habitat, carbon sequestration) to humans when they are conserved. However, forest conservation efforts may conflict with other uses, particularly timber harvest. Incentives for forest conservation can be established through payment for ecosystem services (PES) policies. PES policies rely on forest valuation studies which traditio…					Forest Policy and Economics
	Spatial modelling approach to evaluate the economic impacts of climate change on forests at a local scale	M Viccaro, M Cozzi, L Fanelli, S Romano	2019	Global warming has caused significant environmental and socio-economic impacts on the global and local scales. Based on the definitions of vulnerability and resilience provided by the Intergovernmental Panel on Climate Change, some ecological and management indicators have been developed for forest systems. Using Dempster-Shafer’s theory of evidence, forests were subdivided into different classes…					Ecological Indicators
	Spatially Referenced Decision Analysis of Long-Term Forest Management Scenarios in Southwestern Finland	S Sironen, L Mononen	2018	Multi-criteria decision analysis (MCDA) of regional level long-term forest management scenarios was conducted by applying spatially explicit information to examine the trade-offs between ecological, economic and social impacts. Interval scale judgements were applied to mapped and numerical information jointly, while assessing the performance of alternative scenarios. The experts relied mostly on …					Journal of Environmental Assessment Policy and Management
	Spatio-temporal and cumulative effects of land use-land cover and climate change on two ecosystem services in the Colombian Andes	N Clerici, F Cote-Navarro, FJ Escobedo, K Rubiano, JC Villegas	2019	Climate change can have marked effects on ecosystem service (ES) provision in the Andes, particularly in peri-urban areas. In addition to global-change related processes, cumulative effects such as changing socio-political dynamics, environmental policies, and conflicts are also changing type and magnitude of land use–land cover (LULC) dynamics in the Colombian Andes. Studies in the region have i…					Science of the Total Environment
	Spatiotemporal characteristics in ecosystem service value and its interaction with human activities in Xinjiang, China	Z Zhang, F Xia, D Yang, J Huo, G Wang, H Chen	2020	Human activities are becoming increasingly diverse and disordered, especially in arid areas, which affect ecosystem services more obviously. Conversely, ecosystem services also impose certain constraints on human. In this paper, we employed the model of ecosystem service value (ESV) assessment and grey relational degree, to reveal the spatiotemporal variation characteristics of ecosystem service …					Ecological Indicators
	SPATIOTEMPORAL MODEL FOR LANDSCAPE ECOLOGICAL ASSESSMENT IN LANDSCAPE PLANNING	W Ibrahim	2018	Ecological landscape area is rich with biodiversity and ecosystem are two important factors that balance the serenity of the environment through its ecological function and services. However, landscape change especially rapid urbanization has led to extensive land use and land cover (LULC) transformation that degrades the ecological landscape area and ecosystem services. The limitation of integra…					?Dissertation
	State of Mediterranean forests 2018	P Bleu	2019						A book
2nd round	Strategies for Climate-Smart Forest Management in Austria	R Jandl, T Ledermann, G Kindermann, A Freudenschuss, T Gschwantner, P Weiss	2018	We simulated Austrian forests under different sustainable management scenarios. A reference scenario was compared to scenarios focusing on the provision of bioenergy, enhancing the delivery of wood products, and reduced harvesting rates. The standing stock of the stem biomass, carbon in stems, and the soil carbon pool were calculated for the period 2010–2100. We used the forest growth model Câldi…	Yes	6	2010-2100	Austria	Forests
	Structural analysis of the drivers and barriers to forest management in the Slovak regions of Podpoľanie and Kysuce	R Navrátil, Y Brodrechtová, R Sedmák	2016	The paper presents an application of structural analysis in search of key drivers and barriers of forest management in two Slovak regions: Podpoľanie and Kysuce. A comparison with factors identified in selected European regions is also presented. First, various relevant factors affecting forest management were selected for both regions. The selections draw on the pool of primary data (structured …					Central European Forestry Journal
	Study of Streamflow Response to Land use Land cover Change in the Nethravathi River Basin, India	BS Fulaji	2016	The rainfall over Indian sub-continent is erratic and non-uniform in both South-west monsoon and North-east monsoon, which leads to high floods and severe drought in many places. However, India gets three-fourth of its annual rainfall during south-west monsoon season (June to September). The study of extreme events are significant in stochastic behaviour of rainfall pattern. In this study, freque…					?Dissertation
	Subjective well-being and environmental quality: the impact of air pollution and green coverage in China	L Yuan, K Shin, S Managi	2018	Rapid environmental degradation is a well-publicized issue, particularly in rapidly developing countries. This study examines the impact of air pollution and green coverage on people's subjective well-being (SWB) in China using self-reported life satisfaction (LS) from survey data combined with the city-level air quality index (AQI) and green coverage data. The results show that air pollution and…					Ecological Economics
	Successional pathways of terrestrial lichens in changing Swedish boreal forests	T Horstkotte, J Moen	2019	The current decline of terrestrial lichens in Swedish boreal forests is a major challenge for reindeer husbandry, as lichens constitute essential grazing resources for reindeer during winter. Using a 30-year data set covering northern Sweden, we explore how the successional dynamics of lichen cover depend on several forest characteristics, as well as management strategies regarding both reindeer …					Forest Ecology and Management
	Supply chain planning for bioenergy and biofuel production from forest-based residues in interior British Columbia: a simulation study	DG Siller Benitez	2016	This thesis analyzes a forest-based biomass supply chain network considering uncertainties and variations. It is based on the Williams Lake Timber Supply Area (TSA) located in British Columbia, Canada. The network includes: five conversion facilities distributed in three locations, two types of forest-based biomass, sourced from 337 cutblocks, and two types of sawmill residues sourced from three …					?Dissertation
	Survival and growth as measures of shade tolerance of planted western redcedar, western hemlock and amabilis fir seedlings in hemlock-fir forests of northern Vancouver Islands	A Weber, S Leckie, JPH Kimmins, B Gilbert, JA Blanco, Y-H Lo	2017	We examined two measures of shade tolerance (survival and growth) of planted 1-year-old seedlings of western redcedar (Thuja plicata (Donn ex D. Don)), western hemlock (Tsuga heterophylla ([Raf.] Sarg.)) and amabilis fir (Abies amabilis ([Dougl. ex Loud] Dougl. ex Forbes)). Seedlings were planted at two different sites (forest interior: 4.5% mean above canopy photosynthetically active radiation […					Forest Ecology and Management
	Sustainability Assessment of Alternative Thinning Operations in Mediterranean Softwood Plantations	J Schweier, R Spinelli, N Magagnotti, B Wolfslehner, MJ Lexer	2018	Mediterranean pines account for 14,000 ha in Tuscany alone, where they form large and homogeneous stands and represent an important resource for the forest economy. Among the harvesting systems applied to thinning operations, the most popular are whole-tree and cut-to-length harvestings. Both systems can be deployed with different levels of mechanization. The decision about which system might be …					Forests
	Sustainability impact assessment of forest operations: A review	J Schweier, N Magagnotti, ER Labelle, D Athanassiadis	2019	Purpose of Review One of the challenges of forest operations is to consider the consequences of different management strategies and to estimate the economic, environmental and social performance of different processes, products, or services. From the methods available to quantify the impact of alternative forest management, we selected the method of Sustainability Impact Assessment (SIA), an iter…					Current Forestry Reports
	Sustainability in forest management revisited using multi-criteria decision-making techniques	M Ezquerro, M Pardos, L Diaz-Balteiro	2019	Since its origins, the idea of sustainability has always been linked to forest management. However, nowadays, sustainable forest management has usually been approached by defining a set of criteria and indicators. This paper aims to address sustainability in forest management including a set of criteria encompassing the most common decisions: whether the stands are even or uneven-aged, and the op…					Sustainability
	Sustainable design of packaging materials	S González-García, E Sanye-Mengual…	2016	The development and production of products in a more sustainable way has received special attention in recent years. In particular, packaging products range from single materials with simple designs as well as complex ones that include different materials (cardboard, woody boards, paper, plastics, etc.). A comprehensive assessment of the environmental impacts of a product’s life cycle comprises f…					Environmental Footprints of Packaging
	Sustaining the joint production of timber and Lactarius mushroom: A case study of a forest management planning unit in Northwestern Turkey	D Mumcu Küçüker, EZ Başkent	2017	Forest management planning focusing on sustainable supply of forest-based services such as wood and Non-Wood Forest Products (NWFPs) is important for the sustainability of forest ecosystems over time. This study explores the development of a mushroom integrated decision support system (ETÇAPOptimization) for multiple use forest management planning and for the analysis of long-term effects of diff…					Sustainability
	Synergies and trade-offs between nature conservation and climate policy: Insights from the “Natural Capital Germany–TEEB DE” study	H Wüstemann, A Bonn, C Albert, C Bertram…	2017	Ecosystem-based approaches provide opportunities for climate policy to reduce greenhouse gas (GHG) emissions, to expand the adaptive capacities and resilience of land systems to a changing climate, and to simultaneously protect biodiversity and ecosystems services (ESS). However, knowledge about the economic benefits and cost-efficiency of ecosystem-based approaches is still limited. The objectiv…					Ecosystem Services
	Tamm Review: Nutrient cycling in forests: A historical look and newer developments	DW Johnson, J Turner	2019	In this review, we consider a traditional conceptual model of nutrient cycling in forests and evaluate (1) assumptions and issues with existing methods for measuring and calculating nutrient pools and fluxes, including the estimation of errors; (2) how various elements of the conceptual model vary with geographic and climatic region, and gaps in knowledge about certain regions; (3) predictions fr…					Forest Ecology and Management
Not available	Testing a Habitat Suitability Index Model for Boreal Owls in Western Newfoundland, Canada	KJ Munro, IG Warkentin…	2016
	The “carbon-neutral university”–a study from Germany	E Udas, M Wölk, M Wilmking	2018	Purpose Nowadays, several higher education institutions around the world are integrating sustainability topics into their daily operations, functionality and education systems. This paper presents a case study from a pilot project implemented by the Ernst-Moritz-Arndt-Universität Greifswald (hereafter, Greifswald University), Germany on its way towards a “carbon-neutral university”. The purpose o…					International Journal of Sustainability in Higher Education
Not available	The Carbon Impacts of UK Electricity Produced by Burning Wood Pellets from Drax’s Three U.S. Mills	T Buchholz, J Gunn, B Kittler	2019	No abstract					?Report for Southern Environmental Law Center (SELC) and National Wildlife Federation (NWF)
2nd round	The Carbon Sequestration Potential of Degraded Agricultural Land in the Amhara Region of Ethiopia	B Belay, E Pötzelsberger, H Hasenauer	2018	Forests are a key player within the global carbon cycle and reforestation is an important climate change mitigation mechanism. In this study, we identify potentially suitable areas for reforestation to assess the carbon sequestration potential in the highly deforested and degraded Amhara region of Ethiopia. We apply biogeochemical mechanistic ecosystem modelling to predict the amount of carbon th…	Yes	3	150 years	Ethiopia	Forest Ecology and Management
	The climate benefit of carbon sequestration	C Sierra, SE Crow, M Heimann, H Metzler, ED Schulze	2020	Ecosystems play a fundamental role in climate change mitigation by taking up carbon from the atmosphere and storing it for a period of time in organic matter. Although climate impacts of carbon emissions can be quantified by global warming potentials, it is not necessarily clear what are appropriate formal metrics to assess climate benefits of carbon removals by sinks. We introduce here the Clima…					Biogeosciences Discussion
2nd round	The climate sensitivity of carbon, timber, and species richness covaries with forest age in boreal–temperate North America	D Thom, M Golivets, L Edling, GW Meigs, JD Gourevitch, LJ Sonter, GL Galford, WS Keeton	2019	Climate change threatens the provisioning of forest ecosystem services and biodiversity (ESB). The climate sensitivity of ESB may vary with forest development from young to old‐growth conditions as structure and composition shift over time and space. This study addresses knowledge gaps hindering implementation of adaptive forest management strategies to sustain ESB. We focused on a number of ESB …	?	?	?	Boreal-temperate forests on eastern North America	Global Change Biology
	The Climatic Response of Tree Ring Width Components of Ash (Fraxinus excelsior L.) and Common Oak (Quercus robur L.) from Eastern Europe	CC Roibu, V Sfeclă, A Mursa, M Ionita, V Nagavciuc, F Chiriloaei, I Lesan, I Popa	2020	This paper aims to develop the first differentiated (earlywood—EW, latewood—LW, and total ring width—RW) dendrochronological series for ash (Fraxinus excelsior L.) and oak (Quercus robur L.) trees from the Republic of Moldova, and to analyze their climatic response and their spatio-temporal stability. For this, 18 ash and 26 oak trees were cored from the Dobrușa protected area, Republic of Moldov…					Forests
	The economic value of fire damages in Tuscan agroforestry areas	C Fagarazzi, R Fratini, M Montanino, F Riccioli	2018	The Tuscan Region spends about 12 million euro every year in the prevention and suppression of forest fires. In this context, this study aims to verify the economic and environmental benefits derived from the activities of the prevention and suppression of fires. Starting from a case study of a real fire event in Tuscany, we have simulated three hypothetical scenarios (with different fire duratio…					?Conference Paper?
2nd round	The Effect of Forest Management Strategy on Carbon Storage and Revenue in Western Washington: A Probabilistic Simulation of Tradeoffs	PW Fischer, AC Cullen, GJ Ettl	2016	The objectives of this study are to understand tradeoffs between forest carbon and timber values, and evaluate the impact of uncertainty in improved forest management (IFM) carbon offset projects to improve forest management decisions. The study uses probabilistic simulation of uncertainty in financial risk for three management scenarios (clearcutting in 45‐ and 65‐year rotations and no harvest) …	Yes	3	45 / 65 year rotation	1740 ha forest in western Washington State	Risk Analysis
	The Effects of Group-selection Openings on Regeneration Composition in Conventionally Managed Northern Hardwoods	SP Knapp	2019	Northern hardwood forests in the Upper Great Lakes region—often existing on mesic, nutrient-rich sites and characterized by mixtures deciduous species such as sugar maple (Acer saccharum Marsh.), yellow birch (Betula alleghaniensis Britt.), and/or American beech (Fagus grandifolia L.)—have become more homogenous in composition over time due to the primary uneven-aged management system, single-tre…					?Master's Thesis?
No access	The extinction risk for threatened species in protected areas: the case of the freshwater crayfish (Austropotamobius pallipes) in Italy	F Linda, M Bonelli, S Davide, R Manenti…	2018
	The Impact of Different Management Scenarios on the Availability of Potential Forest Habitats for Wildlife on a Landscape Level: The Case of the Black Stork Ciconia nigra	J Banaś, S Zięba, M Bujoczek, L Bujoczek	2019	This study analyzed the effects of various forest management scenarios on habitats of the black stork, which has very specific requirements: it needs extensive forest complexes with a significant proportion of old trees for nesting, and bodies of water for foraging. The relationship between different forest management scenarios and the presence of black storks was examined in a large forest compl…					Forests
	The impact of forest disturbances on residual biomass supply: A long-term forest level analysis	B Rijal, SH Gautam, L LeBel	2020	Residual forest biomass is an attractive feedstock for bioenergy production due to its abundance and renewability. However, natural forest disturbances such as wildfire and insect infestation cause unpredictable fluctuations in supply, disrupting long-term procurement plans for delivering feedstock to biorefineries. This study proposes a method to assess the impact of disturbances on long-term su…					Journal of Cleaner Production
	The Importance of Fiscal measures in Financial Incentives for Land Use Decisions	M Ryan, C O'Donoghue	2018	The question of what motivates decisions to change land use or farm management practices has recently received much attention in the context of designing policies to incentivise change. This paper critically analyses aspects of the prevailing incentive policies for a long-term land use change such as farm afforestation, with a view to identifying how financial and fiscal components of income infl…					?Conference Paper
	The Integration of Simulation Models for Complex Evaluation of Different Forest Ecosystem Services: Methodological Approaches	PY Grabarnik, OG Chertov, SI Chumachenko, VN Shanin, LG Khanina, MV Bobrovakiy, SS Bykhovets, PV Frolov	2019	To solve the problems of modeling complex ecological, socio-ecological and economic systems, a large number of computer models have been developed, from the simplest ones, which only roughly described the system under investigation, to fairly detailed ones, which allow for studying the behavior of a great number of interacting elements simultaneously. The development of views on the structure and…					Mathematical Biology and Bioinformatics
	The introduction of Pinus contorta in Sweden	S Bäcklund	2016	An increasing demand for forest-based products calls for further development and intensification of forest management. The use of non-native tree species in forestry is a common and expanding silvicultural practice worldwide but the effect of non-native trees on native biodiversity and ecosystem functioning is still poorly understood. The general aim of this thesis is to increase our knowledge ab…					?Dissertation
	The MIMOSE approach to support large-scale statistics on forest ecosystem services	M Vizzarri, F Bottalico, L Antonello	2016	In the last decades, Mediterranean landscapes have been transformed by anthropogenic processes, such as changes in land use and climate. In particular, forest transition in mountain areas, and urban sprawl in lowlands could strongly undermine the ability of ecosystems to provide benefits over time. Under these changing conditions, forest ecosystems have reduced their functionality, resilience and…					?Conference Paper?
	The MIMOSE approach to support sustainable forest management planning at regional scale in Mediterranean contexts	M Vizzarri, L Sallustio, D Travaglini, F Bottalico, G Chirici, V Garfi, R Lafortezza, DS La Mela Veca, F Lombardi, F Maetzke, M Marchetti	2017	In recent decades, Mediterranean landscapes have been affected by human-induced drivers, such as land use and climate change. Forest ecosystems and landscapes have been particularly affected in mountainous regions due to limited management and stewardship, especially in remote areas. Therefore, there is a need to set up new strategies to enhance ecosystem services in forested areas which, in turn…					Sustainability
	The past and future of modeling forest dynamics: from growth and yield curves to forest landscape models	SR Shifley, HS He, H Lischke, WJ Wang, W Jin	2017	Context Quantitative models of forest dynamics have followed a progression toward methods with increased detail, complexity, and spatial extent. Objectives We highlight milestones in the development of forest dynamics models and identify future research and application opportunities. Methods We reviewed milestones in the evolution of forest dynamics models from the 1930s to the present with empha…					Landscape Ecology
2nd round	The potential role of forest management in Swedish scenarios towards climate neutrality by mid century	O Cintas, G Berndes, J Hansson, BC Poudel…	2017	Swedish climate policy targets net zero greenhouse gases (GHG) by mid-century, with road transport independent of fossil fuels by 2030, requiring far-reaching changes in the way energy is used. Forest management is expected to support carbon sequestration and provide biomass for various uses, including energy. In this paper, we combine two energy scenarios with four forest scenarios and quantify …	Yes	2+4	Until 2030?	Sweden	Forest Ecology and Management
	The provision of ecosystem services in response to global change: evidences and applications	R Lafortezza, J Chen	2016	As a consequence of the global increase in economic and societal prosperity, ecosystems and natural resources have been substantially exploited, degraded, or even destroyed in the last century. To prevent further deprivation of the quality of ecosystems, the ecosystem services concept has become a central issue in environmental studies. A growing number of environmental agencies and organizations…					Environmental Research
	The recent northward expansion of Lymantria monacha in relation to realised changes in temperatures of different seasons	JJJ Fält-Nardmann, OP Tikkanen, K Ruohomäki, L-F Otto, R Leinonen, J Pöyry, K Saikkonen, S Neuvonen	2018	The northern regions are warming more rapidly than the global mean. This may cause problems in boreal forests if pest insects expand their ranges north. In Finland, the Nun moth (Lymantria monacha (Linnaeus)) is a potential forest defoliator that has earlier occurred sparsely along the southern coast of the country, but that might become a significant pest as it is in Central Europe. In this stud…					Forest Ecology and Management
	The recreational value of forests under different management systems	F Riccioli, E Marone, F Boncinelli, C Tattoni, D Rocchini, R Fratini	2019	Forest degradation is a severe threat to the provision of ecosystem services, such as timber production, biodiversity and hydrogeological protection. Forest abandonment is one of the main causes of forest degradation in Mediterranean areas where the low value-added of forest activities affects economic sustainability. This issue requires urgent restoration actions which must be supported by cost–…					New Forests
	The relative weight of ontogeny, topology and climate in the architectural development of three North American conifers	F Buissart, M Vennetier, S Delagrange, F Girard, Y Caraglio, S-A Sabatier, AD Munson, E-A Nicolini	2018	Knowledge of plant architecture allows retrospective study of plant development, hence provides powerful tools, through modelling and simulation, to link this development with environmental constraints, and then predict its response to global change. The present study aims to determine some of the main endogenous and exogenous variables driving the architectural development of three North America…					AoB PLANTS
2nd round	The studies on promoting forest carbon sequestration to meet Paris climate agreement targets	S Hyun-deok, A Hyunjin, C Junyeong, I Muhammad, T Diego	2016	The new emission standards from the Paris agreement presented us with many challenges. Since the role of developing countries in responding to climate change is becoming more significant, Korea, which has not been obliged to reduce climate change so far, should prepare groundbreaking carbon reduction strategies. In addition, we need to strengthen international cooperation to arrive at global solu…	?	?	?	Costa Rica	?
	The use of decision support systems in forest management: analysis of forsys country reports	S Nobre, LO Eriksson, R Trubins	2016	From 2009 to 2013, a group of more than 100 researchers from 26 countries, under a COST-Action project named FORSYS, worked on a review of the use of forest management decision support systems (FMDSS). Guided by a template, local researchers conducted assessments of FMDSS use in their countries; their results were documented in Country Reports. In this study, we have used the Country Reports to c…					Forests
	The use of scenarios and models to evaluate the future of nature values and ecosystem services in Mediterranean forests	A Morán-Ordóñez, JV Roces-Díaz, K Otsu, A Ameztegui, L Coll, F Lefevre, J Retana, L Brotons	2019	Science and society are increasingly interested in predicting the effects of global change and socio-economic development on natural systems, to ensure maintenance of both ecosystems and human well-being. The Intergovernmental Platform on Biodiversity and Ecosystem Services has identified the combination of ecological modelling and scenario forecasting as key to improving our understanding of tho…					Regional Environmental Change
	The Valuation of Ecosystem Services from Farms and Forests Informing a systematic approach to quantifying benefits of conservation programs (Synthesis Chapter)	L Wainger, D Ervin	2017	The condition of natural resources affects human well-being in a multitude of ways, including changes to health, safety, and recreational opportunities. Valuing environmental changes, as the specific goods and services that emerge from ecosystems, has been proposed as a method for systematically including these often-ignored benefits in policy decisions. While governmental and academic studies ha…					?The Council on Food, Agricultural & Resource Economics
	Timber mobilization and habitat tree retention in low-elevation mixed forests in Switzerland: an inventory-based scenario analysis of opportunities and constraints	C Temperli, G Stadelmann, E Thürig	2017	Timber use in central Europe is expected to increase in the future, in line with forest policy goals to strengthen local wood supply for CO2-neutral energy production, construction and other uses. Growing stocks in low-elevation forests in Switzerland are currently high as exemplified by the Swiss canton of Aargau, for which an average volume of 346 ± 16 m3 ha−1 was measured in the 3rd Swiss Nati…					European Journal of Forest Research
	Tools for conservation planning in changing forest landscapes: Collaborative landscape scenario modeling in Michigan's Two Hearted River watershed	JM Price	2016	The Two Hearted River watershed has been the focus of collaborative conservation and forest management efforts by The Nature Conservancy, the State of Michigan, local timber management organizations, and private landowners since 2006. Conservation practitioners and land managers in this watershed and other landscapes are faced with the challenge of developing and applying cross-boundary conservat…					?Dissertation
	Toward decision theater design for community forest management & planning: the case of Québec	T Boukherroub, S D'Amours	2016	A generic framework for designing decision theaters (DTs) is proposed. The implementation of this framework is illustrated on community forest management in the province of Québec. In particular, we develop the conceptual design of an integrated Forest Community Decision Support System (FC-DSS). FC-DSS aims at supporting complex forest management planning that involves governmental planners and …					?International Conference on Modeling, Opitimization and Simulation
	Towards complete and harmonized assessment of soil carbon stocks and balance in forests: The ability of the Yasso07 model across a wide gradient of climatic and forest conditions in Europe	L Hernández, R Jandl, VNB Blujdea, A Lehtonen, K Kriiska, I Alberdi, V Adermann, I Canellas, G Marin, D Moreno-Fernandez, I Ostonen, M Varik, M Didion	2017	Accurate carbon-balance accounting in forest soils is necessary for the development of climate change policy. However, changes in soil organic carbon (SOC) occur slowly and these changes may not be captured through repeated soil inventories. Simulation models may be used as alternatives to SOC measurement. The Yasso07 model presents a suitable alternative because most of the data required for the…					Science of the Total Environment
	Towards the economic valuation of ecosystem production from cork oak forests in Sardinia (Italy)	P Corona, V Quatrini, M Schirru, S Dettori, N Puletti	2018	A spatially explicit approach for stand-scale economic valuation of current and future potential of cork forests with respect to ecosystem production is developed and presented. The approach, which relies in large part on the mensuration of stand top height and number of trees as main drivers, has been tested on the pure cork forests of Sardinia (Italy). The test was conducted to assess the effec…					iForest - Biogeosciences and Forestry
2nd round	Trade-off analysis of forest ecosystem services–A modelling approach	X Pang	2017	Forest is a resource that is increasingly utilized for multiple purposes. The balance between energy demands and the long-term capacity of ecosystems to support biodiversity and other ecosystem services is crucial. The aim of this project was to increase the knowledge on and to develop methods and tools for trade-offs and synergies analysis among forest ecosystem services based on different fores…	Yes	?	?	Kronoberg County, Sweden	Doctoral Thesis
	Trade-offs among intensive forestry, ecosystem services and biodiversity in boreal forests	T Pohjanmies		Finnish forests are used extensively for timber production but are also providers of other ecosystem services and harbor unique biodiversity. The ecosystem services approach has so far been used marginally in the context of Finnish forestry; however, due to the multiple values associated with Finnish forests and the impacts forestry operations have on forest ecosystems, it is clearly applicable i…					?Dissertation
2nd round	Trade-offs and synergies among ecosystem services under different forest management scenarios–The LEcA tool	X Pang, EM Nordström, H Böttcher, R Trubins…	2017	Forests provide a multitude of ecosystem services. In Sweden, the goal to replace fossil fuels could induce substantial changes in the current management and use of forests. Therefore, methods and tools are needed to assess synergies and trade-offs between ecosystem services for policy and planning alternatives. The aim of this study was to develop methods for integrated sustainability assessment…	Yes	2	?	Sweden	Ecosystem Services
	Trade-offs and Synergies Between Economic Gains and Plant Diversity Across a Range of Management Alternatives in Boreal Forests	S Chen, C Shahi, HYH Chen, P Kumar, Z Ma, B McLaren	2018	Intensive forest management activities that maximize economic gains could have a negative impact on the ecosystems and generate environmental conflicts, which may in turn translate to poor delivery of ecosystems services. Although plant diversity is positively associated with multiple ecosystem functions, it remains unclear how economic gains influence plant diversity across vegetation strata. We…					Ecological Economics
	Trade-offs between economic gains and ecological functions following forest management alternatives in boreal forests	S Chen	2018	Intensive forest management activities that maximize economic gains could negatively impact the long-term sustainability of ecological functions and associated ecosystem services. Understanding the trade-offs between economic gains and ecological losses is critical for sustainable management of forest resources. However, the effects of management alternatives on ecological functions and services …					?Dissertation?
	Trade-offs between ecosystem service provision and the predisposition to disturbances: a NFI-based scenario analysis	C Temperli, C Blattert, G Stadelmann, UB Brändli, E Thürig	2020	Background: Scenario analyses that evaluate management effects on the long-term provision and sustainability of forest ecosystem services and biodiversity (ESB) also need to account for disturbances. The objectives of this study were to reveal potential trade-offs and synergies between ESB provision and disturbance predisposition at the scale of a whole country. Methods: The empirical scenario mo…					Forest Ecosystems
2nd round	Trade-offs between forest carbon stocks and harvest in a steady state - A multicriteria analysis	K Pingoud, T Ekholm, R Sievänen, S Huuskonen…	2018	This paper provides a perspective for comparing trade-offs between harvested wood flows and forest carbon stocks with different forest management regimes. A constant management regime applied to a forest area with an even age-class distribution leads to a steady state, in which the annual harvest and carbon stocks remain constant over time. As both are desirable – carbon stocks for mitigating cli…	Yes	?	30-40, 100 years	Finland	Journal of Environmental Management
2nd round	Trade-offs between timber production, carbon stocking and habitat quality when managing woodlots for multiple ecosystem services	S Carpentier, E Filotas, IT Handa…	2017	Managing for multiple ecosystem services is a growing issue for forest managers. As trade-offs arise between conflicting management objectives, stakeholders must be informed of the possible outcomes of alternative choices in order to facilitate decision-making. We modelled stand dynamics under single-management and functional zoning multiple-management (TRIAD; i.e. three-zone) scenarios in differ…	Yes	3	70 years	Typical forest types of eastern North America	Environmental Conservation
	Trade-offs between wood production and forest grouse habitats in two regions with distinctive landscapes	H Haakana, E Huhta, H Hirvelä, T Packalen	2020	Background: Forest management affects the viability of forest grouse populations, causing alterations to habitat quality. At the regional level, common targets for wood harvesting and safeguarding of specific habitats are negotiated between various stakeholders. Analysing potential trade-offs between forest grouse habitats and wood production in the region could support resource-smart decision ma…					Forest Ecosystems
	Tradeoffs between US national forest harvest targets and fuel management to reduce wildfire transmission to the wildland urban interface	AA Ager, RM Houtman, MA Day, C Ringo, P Palaiologou	2019	US public land management agencies are faced with multiple, often conflicting objectives to meet management targets and produce a wide range of ecosystem services expected from public lands. One example is managing the growing wildfire risk to human and ecological values while meeting programmatic harvest targets for economic outputs mandated in agency budgets. Studies examining strategic managem…					Forest Ecology and Management
2nd round	Tradeoffs in Timber, Carbon, and Cash Flow under Alternative Management Systems for Douglas-Fir in the Pacific Northwest	DD Diaz, S Loreno, GJ Ettl, B Davies	2018	Forest management choices offer significant potential to mitigate global climate change and biodiversity loss. To illuminate tradeoffs relevant to policymakers, forest sector stakeholders, and consumers of forest products, we utilize three Key Performance Indicators—average carbon storage in the forest and wood products; cumulative timber output; and discounted cash flow—to compare four alternati…	Yes	4	100 years	Douglas-fir forests on 64 parcels across western Oregon and Washington	Forests
2nd round	Transformation scenarios towards a low-carbon bioeconomy in Austria	G Kalt, M Baumann, C Lauk, T Kastner, L Kranzl, F Schipfer, M Lexer, W Rammer, A Schaumberger, E Schriefl	2016	The transformation towards a low-carbon bioeconomy until 2050 is one of the main strategic long-term targets of the European Union. This work presents transformation scenarios for the case of Austria with GHG reduction to about 20% of Kyoto baseline. The scenarios are developed with an optimization model integrating the energy sector, land use and biomass flows. Focus is on investigating possible…	Yes	3	Until 2050	Austria	Energy Strategy Reviews
	Tree and stand structure of the non-native Pinus contorta in relation to native Pinus sylvestris and Picea abies in young managed forests in boreal Sweden	S Bäcklund, M Jönsson, J Strengbom…	2018	Managed forest stands are typically younger and structurally less diverse than natural forests. Introduction of non-native tree species might increase the structural changes to managed forest stands, but detailed analyses of tree- and stand-structures of native and non-native managed forests are often lacking. Improved knowledge of non-native forest structure could help clarify their multiple val…					Scandinavian Journal of Forest Research
	Trends and patterns in surface water chemistry in Europe and North America between 1990 and 2016, with particular focus on changes in land use as a confounding factor for recovery	ØA Garmo, Ø Kaste, J Arle, K Austnes, H de Wit…	2020	The report presents trends in sulphate, nitrate, chloride, base cations, ANC (acid neutralising capacity), pH and DOC at circa 500 ICP Waters sites in Europe and North America for the period 1990-2016. Time series were analysed for trends in annual median values, annual extreme values and change points, that indicate years with sudden changes in trend or level. Also provided is a brief overview o…					NERC Open Research Archive
	Trends in global research in forest carbon sequestration: A bibliometric analysis	L Huang, M Zhou, J Lv, K Chen	2020	Based on the Web of Science Core Collection databases from 1990 to 2018, a scientometric analysis of 1,284 academic works related to forest carbon sequestration is carried out to characterize the intellectual landscape by identifying and revealing the basic characteristics, research power, intellectual base and research hotspots in this field. The results of this work show that: ① the number of p…					Journal of Cleaner Production
Not available	Turnover times for wood, forest litter, roots and soil organic matter	PA Arp	2016						?Book: Ecological Forest Management Handbook
2nd round	Urbanization as a land use change driver of forest ecosystem services	S Delphin, FJ Escobedo, A Abd-Elrahman, WP Cropper	2016	Land use change in the form of urbanization is a direct driver affecting the provision of ecosystem services from forests. To better understand this driver, we modeled the effects of urbanization on three regulating and provisioning ecosystem services in two disparate watersheds in Florida, USA. The study integrated available geospatial and plot-level forest inventory data to assess future change…	Yes	?	57 years, 2003-2060	Florida, USA	Land Use Policy
	Using airborne laser scanning to assist in substantial forest management decisions for Sechelt's community forest on British Columbia's Sunshine Coast	A Yuill	2016	As of 2016, there were 57 community forestry organizations in British Columbia apart of various community forest agreements (CFA). Community forests allow for the development of multi-use management plans to reflect a diverse set of values. The availability of detailed information of the forested area is vital to maximizing a community’s benefits and profits. Airborne laser scanning (ALS) can pro…					?Master's Thesis?
	Using model forests as a form of balanced forestry in Ukraine	L Cherchyk, L Korchynska, V Babenko	2019	The relevance of the research topic is prompted by the need to improve the practical instruments of forest management and make them in line with the principles of sustainable development. The research is aimed at facilitating the implementation of environmental, social and economic functions of forest ecosystems in a long-term perspective. The study made use of the following methods: systemic str…					Forestry Studies
	Using Sentinel-2 derived deforestation maps of Bialowieza forest to assess habitat quality with invest	R Morrone	2019	Straddling the border of Poland and Belarus, the Białowieża Forest is an irreplaceable area for biodiversity conservation, in particular due to its size, protection status, and undisturbed nature. Forests provide a wide range of ecosystem services that are important to human well-being, but at the same time biodiversity is under threat as a result of human activities. The historical replacement o…					?Master's Thesis?
	Using von Thünen rings and service-dominant logic in balancing forest ecosystem services	A Roos, J Eggers, C Mark-Herbert, A Lindhagen	2018	The allocation of forest land to different uses for ecosystem services (ES) is a complex task which is increasingly influenced by current urbanisation trends and the growth of the service-oriented economy. With the focus on cultural ES, this paper examines the principles that are intended to ensure the best cultural ES value in forest land use allocation. The analysis considers the co-creation pr…					Land Use Policy
	Utilizing boreal forest for climate mitigation-at what cost?: A Fuzzy Cognitive Mapping approach connecting the Paris Agreement to the sustainability of reindeer grazing	C Godeau	2017	The potential of utilizing boreal forests for carbon storage has gained momentum, a recognition reflected in both the Paris Agreement and science. Research on the consequences of climate policy on sustainable forest management delineate, rather inadequately, the complexities of policy-human-environment interactions. These studies are limited in terms of integrating various land user with differen…					?Bachelor's Thesis?
	Variation in Forest Soil-Nutrient Availability: Dynamic Model Estimates of Past and Future Conditions at Two Sites in the Daniel Boone National Forest, Kentucky, USA	TC McDonnell, J Aherne, TJ Sullivan, C Barton, C Cotton, B Jackson	2019	Tree harvesting on soils with low nutrient pools is a consideration in forest management on public lands in the southeastern United States. This study evaluated the effect of future tree harvesting on soil nutrient base cation supply in the context of recovery from historical nitrogen (N) and sulfur (S) deposition at two locations within the Daniel Boone National Forest. A dynamic biogeochemical …					?Final Report?
	Variations in the biomass of Eucalyptus plantations at a regional scale in Southern China	Q Qiu, G Yun, S Zuo, J Yan, L Hua, Y Ren, J Tang, Y Li, Q Chen	2018	We quantified deviations in regional forest biomass from simple extrapolation of plot data by the biomass expansion factor method (BEF) versus estimates obtained from a local biomass model, based on large-scale empirical field inventory sampling data. The sources and relative contributions of deviations between the two models were analyzed by the boosted regression trees method. Relative to the l…					Journal of forestry research
2nd round	Voluntary carbon credits from improved forest management: policy guidelines and case study	G Vacchiano, R Berretti, R Romano, R Motta	2018	Human activities have the potential to enhance carbon sequestration by the world’s forests and contribute to climate change mitigation. Voluntary carbon trading is currently the only option to pursue and reward carbon sequestration by forestry activities. Carbon credits for enhanced sequestration can be sold to partners wishing to offset their own emissions. Here we illustrate the steps taken to …	Yes	2 +	20 years	Beech and chestnut in southern part of the Piemonte region, Italy	Biogeoschiences and Forestry
	Water limitation can negate the effect of higher temperatures on forest carbon sequestration	S Belyazid, Z Giuliana	2019	Climate change will bring about a consistent increase in temperatures. Annual precipitation rates are also expected to increase in boreal countries, but the seasonal distribution will be uneven, and several areas in the boreal zone will experience wetter winters and drier summers. This study uses the dynamic forest ecosystem model ForSAFE to estimate the combined effect of changes in temperature …					European Journal of Forest Research
	What are intermediate-severity forest disturbances and why are they important?	JL Hart, JS Kleinman	2018	The classification of discrete forest disturbance events is usually based on the spatial extent, magnitude, and frequency of the disturbance. Based on these characteristics, disturbances are placed into one of three broad categories, gap-scale, intermediate-severity, or catastrophic disturbance, along the disturbance classification gradient. We contend that our understanding of disturbance proces…					Forests
	WHICH SILVICULTURAL MEASURES ARE RECOMMENDED TO ADAPT FORESTS TO CLIMATE CHANGE? A LITERATURE REVIEW	C Coşofreţ, L Bouriaud	2019	Climate change is a challenge for forest managers and owners. The trees regenerated in forest stands today will have to cope with changing conditions during their lifetime. Adaptive forest management includes a large variety of silvicultural measures: changes in species composition by converting monocultures to mixed forests, changes in forest structure, intensified thinning, or the reduction of …					?Bulletin of the Transilvinia University of Brasov?
	Wildfires managed for restoration enhance ecological resilience	AMG Barros, AA Ager, MA Day, MA Krawchuk…	2018	Expanding the footprint of natural fire has been proposed as one potential solution to increase the pace of forest restoration programs in fire‐adapted landscapes of the western USA. However, studies that examine the long‐term socio‐ecological trade‐offs of expanding natural fire to reduce wildfire risk and create fire resilient landscapes are lacking. We used the model Envision to examine the ou…					Ecosphere
	Will substituting fossil fuels with biofuels lead to a net reduction in CO2 emissions?: The case of district heating in Norrköping municipality	S Ljunberg	2018	With global warming and the international, national and local goals of reducing greenhouse gas net emissions, the phasing out of fossil fuels are of great importance. One energy source resulting in nearly no net emissions are biofuels. Residue from the forest industry, such as tops and branches, is already today in Sweden an important source of energy, especially in the district heating sector. T…					?Master's Thesis?

## Sheet: Chosen to 2nd round
Status/characterization	Title	Authors	Year	Journal	Abstract	Scenarios	Number of scenarios	Time period	Country / location	Which carbon stocks are included?	Simulation model	Explicit reference scenario to which all the other scenarios are reflected	Harvest rates provided for scenarios	Forest carbon stocks provided for scenarios	Forest carbon stock changes between scenarios and reference scenario	Forest carbon sink or net ecosystem exchange provided for scenarios	Over which period carbon indicator can be calculated?	Carbon indicator values provided
For calculation	Climate change mitigation challenge for wood utilization - The case of Finland	S Soimakallio, L Saikku, L Valsta, K Pingoud	2016	Environmental Science & Technology	The urgent need to mitigate climate change invokes both opportunities and challenges for forest biomass utilization. Fossil fuels can be substituted by using wood products in place of alternative materials and energy, but wood harvesting reduces forest carbon sink and processing of wood products requires material and energy inputs. We assessed the extended life cycle carbon emissions considering …	Yes	6	100 years	Finland	Living trees, litter and deadwood	MOTTI model results based on Hynynen et al. (2015), Helin et al. (2016)	Yes; Average annual harvest rate (0 Mm3 i.e. No harvest)	Yes; for all six harvest scenarios	No	Yes	No	100a	default value 0.7 (uncertainty range applied 0.4-1.1)
For calculation	Climate change effects of forestry and substitution of carbon-intensive materials and fossil fuels	L Gustavsson, S Haus, M Lundblad…	2017	Renewable and Sustainable Energy Reviews	We estimate the climate effects of directing forest management in Sweden towards increased carbon storage in forests with more land set-aside for protection, or towards increased forest production for the substitution of carbon-intensive materials and fossil fuels, relative to a reference case of current forest management. We develop various scenarios of forest management and biomass use to estim…	Yes	3	100 years	Sweden	above and below ground carbon in living trees, litter, dead wood, soil organic carbon	Heureka Regwise simulator	No	Yes	Yes (for total living tree biomass)	Yes (including soil carbon)	No		No
For calculation	Scenario analysis using carbon budget modelling for alternative forest management strategies in Turkey: the case study of Arikaya	E Satir	2017	Thesis / Dissertation	Increasing carbon stock in forests is fundamental for climate change mitigation. Forest carbon management can also play a critical role in keeping forests healthy, while addressing multiple wildlife and human needs. To fulfill this potential, forest management practices require an improved understanding of annual carbon stocks and carbon dynamics. However, this information is oftentimes not prope…	Yes	3	100 years	Turkey	Aboveground and belowground biomass and dead organic matter, including soil	The Forest Planning Studios Atlas (FPS-Atlas) and the Carbon Budget Model of the Canadian Forest Service (CBM-CFS3)	Yes; Initial harvest volume is 12,700m3/year	Yes	Yes	Yes	No	20 / 100 a	No
No required data available	Dynamic simulation of carbon stocks in tropical lowland savanna in East Nusa Tenggara, Indonesia	AA Almulqu, J Boonyanuphap	2017	Naresuan University Journals	Tropical forest can stabilize CO2 concentration in atmosphere by absorbing CO2 through photosynthesis process and store it in forest biomass. Carbon stock information in forest biomass is required to facilitate carbon sink programme. This study aims to calculate carbon pools and carbon sequestration, and to simulate the dynamics of carbon stocks in the tropical lowland savanna by using the Carbon…	Yes	3 ( not comparable as regards to differences in harvest rates)	200 years	Taman Wisata Alam Camplong (Camplong Nature Recreation Park), Camplong village, Kupang Regency, East Nusa Tenggara Province, Indonesia	living biomass, dead biomass (Litter), carbon in the soil (from soil surface to 1 m depth)	Carbon Accounting Simulation Software CASS	No	No	Yes	No	No	NA	No
For calculation	Estimation forecast of the Russian Federation forests carbon balance based on the long-term scenarios of forest complex development	IO Torzhkov, AV Konstantinov, EA Kushnir	2019	IOP Conference Series: Earth and Environmental Science	The study assessed the carbon balance of the forests in Russia according to long-term plans for the economic development of the forest sector until 2050, taking into account the expected climate changes. The calculated data of the regional climate model for the IPCC (Intergovernmental Panel on Climate Change) RCP-8.5 plan to assess the impact of changes in physical abiotic factors on the forest e…	Yes	3	Until 2050	Russia	?	CBM-CFS3 model	Yes; all three scenarios have their own baseline	Yes	Yes		Yes		A stacked-volume ratio of 0.63
For calculation	Balancing trade-offs between ecosystem services in Germany's forests under climate change	M Gutsch, P Lasch-Born, C Kollas, F Suckow, CPO Reyer	2018	Environmental Research Letters	Germany's forests provide a variety of ecosystem services. Sustainable forest management aims to optimize the provision of these services at regional level. However, climate change will impact forest ecosystems and subsequently ecosystem services. The objective of this study is to quantify the effects of two alternative management scenarios and climate impacts on forest variables indicative of ec…	Yes	2	Until 2045	Germany	belowground biomass, deadwood, litter, organic soil, and mineral soil	Model 4c	Yes (baseline management)	Yes	Yes	No	Yes	35 a	No
No required data available	A systems approach to assess climate change mitigation options in landscapes of the United States forest sector	AJ Dugan, R Birdsey, VS Mascorro, M Magnan, CE Smyth, M Olguin, WA Kurz	2018	Carbon Balance and Management	Background United States forests can contribute to national strategies for greenhouse gas reductions. The objective of this work was to evaluate forest sector climate change mitigation scenarios from 2018 to 2050 by applying a systems-based approach that accounts for net emissions across four interdependent components: (1) forest ecosystem, (2) land-use change, (3) harvested wood products, and (4…	Yes	8	32 years, 2018-2050	Two case studies in the U.S.: coastal South Caroline and Northern Wisconsin	?	Carbon Budget Model	Yes; BAU	No (for BAU only)	No	Yes (cumulatively up to 2030 and 2050)	No (for BAU only)	NA	No
No required data available	A simple grid-based framework for simulating forest structural trajectories linked to transient forest management scenarios in Fennoscandia	T Majasalmi, M Allen, C Antón-Fernández, R Astrup, RM Bright	2020	Climatic Change	Forest structural properties largely govern surface fluxes of moisture, energy, and momentum that strongly affect regional climate and hydrology. Forest structural properties are greatly shaped by forest management activities, especially in the Fennoscandia (Norway, Sweden, and Finland). Insight into transient developments in forest structure in response to management intervention is therefore es…	Yes	5	2015-2100	Norway	?	Forest State Simulator (F2S2), the open source single tree simulator SiTree	No	Yes	No	No	No	NA	No
No required data available	Analyzing the effects of various forest management strategies and carbon prices on carbon dynamics in western Turkey	DM Kucuker	2019	Journal of Environmental Management	Determining appropriate management strategies to reduce greenhouse gas emissions using optimization techniques to understand how forest management activities affect the carbon dynamics is critical in implementing effective carbon management policies. This paper quantitatively analyzes the long-term effects of different management policies and silvicultural interventions using linear programming. …	Yes	25	100 years	Korucu forest planning unit, Balıkesir province, Turkey	above and below ground carbon in living trees	Lingo software	No	Yes	No (transparency issue with forest carbon stocks as carbon emitted from harvested wood is included)	No	No	NA	No
No required data available	Assessment on forest carbon sequestration in the Three-North Shelterbelt Program region, China	X Chu, J Zhan, Z Li, F Zhang, W Qi	2019	Journal of Cleaner Production	Forest ecosystems are a major component of the terrestrial ecosystems as they provide a variety of important ecosystem services, especially climate regulation via carbon sequestration. The Three-North Shelterbelt Program (TNSP), a pioneer for China's large-scale ecological construction, has promoted massive afforestation and forest dynamics since 1978. Quantitative analysis of carbon sequestratio…	No	0	1990-2015	China	Aboveground biomass, belowground biomass, soil, and dead organic matter	InVEST model	No	No	No	No	No	NA	No
No required data available	Biological and market responses of pine forests in the US Southeast to carbon fertilization	JD Henderson, R Parajuli, RC Abt	2020	Ecological Economics	In the coming decades, climate change is projected to cause carbon dioxide fertilization effects in pine forests in the US Southeast. Resulting changes in pine (loblolly) growth will impact forest markets and regional carbon sequestration. We examine this impact in the context of baseline demand scenarios of increasing sophistication to determine the relative impact of growth and business as usua…	Yes	4	2013-2063	Pine forests in the US Southeast	Live trees, standing dead trees, understory, down and dead trees, and forest floor	3-PG forest growth model based on 20 climate models and Representative Concentration Pathway scenarios 4.5 and 8.5 and Sub-Regional Timber Supply model	BAU	No	Yes (but only as indexes compared to the starting point which is not presented)	No	No	NA	No
No required data available	Analysing scenario approaches for forest management—One decade of experiences in Europe	MA Hoogstra-Klein, GM Hengeveld…	2017	Forest Policy and Economics	In forest management, scenarios are often used to envision what the future might look like to account for uncertainties associated with, for example, climate change, changing socio-economic conditions, and technological developments. There are, however, many different methodological approaches to scenario building. In order to be able to make better use of the diversity of approaches at hand, a s…	No (review analysis of scenario approaches)	NA	NA	Europe	NA	NA	No	No	No	No	No	NA	No
No required data available	Ecosystem service trade-offs for adaptive forest management	F Schwaiger, W Poschenrieder, P Biber, H Pretzsch	2019	Ecosystem Services	Quantifying ecosystem services as dependent on forest management and analyzing tradeoffs between them can help to make decisions on management more effective, efficient, sustainable, and stable. We use a forest management model (SILVA) to predict changes in ecosystem service provisions. Three stakeholder specific forest management scenarios (multifunctional, wood production, set-aside) for each o…	Yes	3	0-100a	Two case study areas in Germany, Brandenburg and Augsburg Western Forest	Carbon in living biomass	SILVA model	Yes, no harvest	Yes	No (transparency issue; not provided separately for forest)	No	No	NA	No
No required data available	Carbon and biodiversity impacts of intensive versus extensive tropical forestry	BW Griscom, RC Goodman, Z Burivalova…	2017	Conservation Letters	How should we meet the demand for wood while minimizing climate and biodiversity impacts? We address this question for tropical forest landscapes designated for timber production. We model carbon and biodiversity outcomes for four archetypal timber production systems that all deliver the same volume of timber but vary in their spatial extent and harvest intensity. We include impacts of variable d…	Yes	1 (all 4 scenarios produce 10,000 m3 of timber each year from a 30,000 ha forest area)	60 years	Tropical forest	?	Monte Carlo Simulation	No	No	No	No	No	NA	No
No required data available	Carbon sequestration and substitution potential of subtropical mountain Sugi plantation forests in central Taiwan	FC Chang, CH Ko, PY Yang, KS Chen, KH Chang	2017	Journal of Cleaner Production	Forests are the most important terrestrial carbon source and sink, with forest biomass and productivity influencing the level of carbon storage in the ecosystem. In this study, the carbon sequestration of Sugi (Japanese cedar) was estimated according to 25-year plantation forest inventory data in the Experimental Forest, National Taiwan University, Nantou County, Taiwan. The total biomass, trunk …	NA	NA	25 years	Taiwan	Above-ground biomass (?)	NA	No	No	No	No	No	NA	No
No required data available	Carbon sequestration in managed temperate coniferous forests under climate change	CC Dymond, S Beukema, CR Nitschke, KD Coates, RM Scheller	2016	Biogeosciences	Management of temperate forests has the potential to increase carbon sinks and mitigate climate change. However, those opportunities may be confounded by negative climate change impacts. We therefore need a better understanding of climate change alterations to temperate forest carbon dynamics before developing mitigation strategies. The purpose of this project was to investigate the interactions …	Yes	2	Until 2050	Copper-Pine Creek valley	Above ground, roots, DOM, soil	LANDIS-II model / Monte Carlo Simulation	No	No	Yes	No	No	NA	No
No required data available	Urbanization as a land use change driver of forest ecosystem services	S Delphin, FJ Escobedo, A Abd-Elrahman, WP Cropper	2016	Land Use Policy	Land use change in the form of urbanization is a direct driver affecting the provision of ecosystem services from forests. To better understand this driver, we modeled the effects of urbanization on three regulating and provisioning ecosystem services in two disparate watersheds in Florida, USA. The study integrated available geospatial and plot-level forest inventory data to assess future change…	Yes	1	57 years, 2003-2060	Florida, USA	aboveground biomass, belowground biomass, soil organic matter, dead biomass	The Integrated Valuation and Ecosystem Services Tradeoffs model	No	No	No	No	No	NA	No
For calculation	Tradeoffs in Timber, Carbon, and Cash Flow under Alternative Management Systems for Douglas-Fir in the Pacific Northwest	DD Diaz, S Loreno, GJ Ettl, B Davies	2018	Forests	Forest management choices offer significant potential to mitigate global climate change and biodiversity loss. To illuminate tradeoffs relevant to policymakers, forest sector stakeholders, and consumers of forest products, we utilize three Key Performance Indicators—average carbon storage in the forest and wood products; cumulative timber output; and discounted cash flow—to compare four alternati…	Yes	4	100 years	Douglas-fir forests on 64 parcels across western Oregon and Washington	Above- and below-ground biomass of live trees, standing biomass of dead trees		No	Yes (timber volume)	Yes	No	No	50a / 95a	No
No required data available	The Effect of Forest Management Strategy on Carbon Storage and Revenue in Western Washington: A Probabilistic Simulation of Tradeoffs	PW Fischer, AC Cullen, GJ Ettl	2016	Risk Analysis	The objectives of this study are to understand tradeoffs between forest carbon and timber values, and evaluate the impact of uncertainty in improved forest management (IFM) carbon offset projects to improve forest management decisions. The study uses probabilistic simulation of uncertainty in financial risk for three management scenarios (clearcutting in 45‐ and 65‐year rotations and no harvest) …	Yes	3	45 / 65 year rotation	1740 ha forest in western Washington State	aboveground live biomass, live roots, snags and logs	Forest Vegetation Simulator FVS	Yes (The long‐term average of CC45 scenario serves as the baseline from which C credits are calculated.)	No	No (transparency issue; not provided separately for forest)	No	No	NA	No
No required data available	The climate sensitivity of carbon, timber, and species richness covaries with forest age in boreal–temperate North America	D Thom, M Golivets, L Edling, GW Meigs, JD Gourevitch, LJ Sonter, GL Galford, WS Keeton	2019	Global Change Biology	Climate change threatens the provisioning of forest ecosystem services and biodiversity (ESB). The climate sensitivity of ESB may vary with forest development from young to old‐growth conditions as structure and composition shift over time and space. This study addresses knowledge gaps hindering implementation of adaptive forest management strategies to sustain ESB. We focused on a number of ESB …	No	NA	NA	Boreal-temperate forests on eastern North America	aboveground live, dead standing carbon, dead downed carbon, soil organic carbon, forest floor carbon	Bayesian models	No	No	No	No	No	NA	No
No required data available	The Carbon Sequestration Potential of Degraded Agricultural Land in the Amhara Region of Ethiopia	B Belay, E Pötzelsberger, H Hasenauer	2018	Forest Ecology and Management	Forests are a key player within the global carbon cycle and reforestation is an important climate change mitigation mechanism. In this study, we identify potentially suitable areas for reforestation to assess the carbon sequestration potential in the highly deforested and degraded Amhara region of Ethiopia. We apply biogeochemical mechanistic ecosystem modelling to predict the amount of carbon th…	Yes	3	150 years	Ethiopia	aboveground carbon, soil carbon	Biome-BGC	No	No	Yes	No	No	NA	No
No required data available	Trade-offs between timber production, carbon stocking and habitat quality when managing woodlots for multiple ecosystem services	S Carpentier, E Filotas, IT Handa…	2017	Environmental Conservation	Managing for multiple ecosystem services is a growing issue for forest managers. As trade-offs arise between conflicting management objectives, stakeholders must be informed of the possible outcomes of alternative choices in order to facilitate decision-making. We modelled stand dynamics under single-management and functional zoning multiple-management (TRIAD; i.e. three-zone) scenarios in differ…	Yes	3	70 years	Typical forest types of eastern North America	aboveground live tree biomass	Forest Vegetation Simulator FVS	No	Yes	No	No	No	NA	No
No required data available	Potential greenhouse gas reductions from Natural Climate Solutions in Oregon, USA	RA Graves, RD Haugo, A Holz, M Nielsen-Pincus…	2020	PLOS one	Increasing concentrations of greenhouse gases (GHGs) are causing global climate change and decreasing the stability of the climate system. Long-term solutions to climate change will require reduction in GHG emissions as well as the removal of large quantities of GHGs from the atmosphere. Natural climate solutions (NCS), i.e., changes in land management, ecosystem restoration, and avoided conversi…	Yes	4	2020-2050	Oregon, USA	Aboveground carbon	NA	Yes	Yes	No	No	No	NA	No
For calculation	Optimal strategies for integrated forest management in megacities combined with wood and carbon services	H Li, G Liu, Y Liu, Y Zhu, X Yang	2019	Journal of Cleaner Production	Based on a simulated annealing algorithm, this study empirically determined the optimal stand-level forest management strategies for the Miyun Reservoir Catchment (MRC), the important protective screen and ecosystem service provider for Beijing City. The optimization results of wood provisioning indicate that the objective yield can be more effectively and sustainably attained over longer plannin…	Yes	3	50-100 years	Beijing City	Annealing algorithm	?	0m3/y	Yes	Yes	Yes	No	50a / 100a	No
No required data available	Long-Term Impacts of China's New Commercial Harvest Exclusion Policy on Ecosystem Services and Biodiversity in the Temperate Forests of Northeast China	K Liu, Y Liang, HS He, WJ Wang, C Huang, S Zong, L Wang, J Xiao, H Du	2018	Sustainability	Temperate forests in Northeast China have been severely exploited by timber harvesting in the last century. To reverse this trend, China implemented the Classified Forest Management policy in the Natural Forest Conservation Program in 1998 to protect forests from excessive harvesting. However, the policy was unable to meet the 2020 commitment of increasing growing stock (set in the Kyoto Protocol…	Yes	3	2010-2100	Northeast China	Aboveground biomass	LANDIS PRO 7.0 model	No	No	Yes	No	No	NA	No
Article not available	Long-term forest carbon storage and structural development as influenced by land-use history and reforestation approach	AR Urbano	2016	?Master's Thesis?	Temperate forests are an important carbon sink, yet there is uncertainty regarding land-use history effects on biomass accumulation and carbon storage potential in secondary forests. Understanding long-term biomass dynamics is important for managing forests as carbon sinks and for co-benefits such as watershed protection and biodiversity. However there are many unanswered questions regarding thes…	?	?	2001-2013	Norhteastern U.S. Forests	?
No required data available	Future forest dynamics under climate change, land use change, and harvest in subtropical forests in Southern China	Z Wu, E Dai, Z Wu, M Lin	2019	Landscape Ecology	Context Subtropical forests have and will continue to face tremendous pressure from various disturbances, which have the potential to alter forest composition, structure, and function. Forest dynamics relate to spatial patterns, ecological processes, and their interactions. However, integrating forest ecosystems and land systems has seldom been attempted in southern China. Objectives We explore t…	Yes	7	2010-2050	Southern China	Aboveground biomass	LANDIS-II, PnET-II and CA-Markov	No	No	Yes	No	No	NA	No
No required data available	Forest sector greenhouse gas emissions sensitivity to changes in forest management in Maine (USA)	JS Gunn, T Buchholz	2018	Forestry: An International Journal of Forest Research	We used a life cycle greenhouse gas (GHG) accounting tool to test the sensitivity of Maine’s state-wide forest sector GHG emissions to changes in forest management. Inputs included forest cover data and growth and yield models for the state of Maine. We estimated net GHG emissions over 100- and 300-year time horizons of different management strategies across a range of carbon (C) pools and emissi…	Yes	7	100 and 300 years	Maine	Above- and below-ground live and dead biomass	ForGATE	Yes	No	No	Yes	No	NA	No
For calculation	Forest management scenarios in a changing climate: trade‐offs between carbon, timber, and old forest	MK Creutzburg, RM Scheller, MS Lucash, SD LeDuc, MG Johnson	2016	Ecological Applications	Balancing economic, ecological, and social values has long been a challenge in the forests of the Pacific Northwest, where conflict over timber harvest and old‐growth habitat on public lands has been contentious for the past several decades. The Northwest Forest Plan, adopted two decades ago to guide management on federal lands, is currently being revised as the region searches for a balance betw…	Yes	4	100 years	Pacific Northwest, Oregon Coast Range	?	LANDIS-II forest simulation model	Yes	Yes; for all four scenarios	Yes	Yes	Yes	50a / 100a	C:N ratio 17
No required data available	Forest management practice for enhancing carbon sequestration in national forests of Korea	H An, HD Seok, SM Lee, J Choi	2019	Forest Science and Technology	This paper examines forest management planning and its possible outcomes using linear programing (LP). More specifically, the most appropriate forest harvesting schedule was selected that can maximize the carbon sequestration in the current forest areas considering forest manager’s income. The LP model allows the managers to segment forests into cutting units under rotation basis logging activiti…	Yes	?	50 years	Korea	Linear programing (LP) model	linear programming type of model	Yes; BAU	Yes	No	No	No (only carbon sequestration not including carbon loss in harvest)	NA	No
No required data available	Financial viability and carbon payment potential of large-scale silvicultural intensification in logged dipterocarp forests in Indonesia	C Romero, FE Putz	2017	Forest Policy and Economics	To sustain timber yields from selectively logged tropical forests, silvicultural treatments beyond reduced-impact logging are often recommended but seldom implemented outside of research areas. To determine the extent to which financial constraints justify the reluctance of Indonesian forest industries to intensify their silviculture at operational scales, we develop a series of scenarios to comp…	Yes	2 (for which 4 different harvest cycles)	30 years	Dipterocarp forests in Indonesia	?	SILFOR	Yes; BAU	Yes	No	No	No	NA	No
For calculation	Exploring the effects of climate change mitigation scenarios on timber, water, biodiversity and carbon values: A case study in Pozantı planning unit, Turkey	EZ Baskent	2019	Journal of Environmental Management	This study evaluated the performance of three climate change mitigation management scenarios; business as usual (BAU), low intensity management (LIM) and high intensity management (HIM) to provide ecosystem services. ETCAP simulation model was used to forecast forest development for Pozantı area with 17,603 ha forests in Turkey. Wood production, biodiversity conservation, carbon sequestration and…	Yes	3	100 years	Pozanti, Turkey	i) above and below-ground biomass, ii) deadwood and ii) harvested wood products (HWP)	ETCAP	Yes, BAU	Yes	Yes	No	Yes	0-100a		"The scenarios are developed to vary in terms of climate mitigation efforts and the resulting climate change information based on modeling efforts using the GLOBIOM model"
No required data available	Evaluating carbon storage, timber harvest, and habitat possibilities for a Western Cascades (USA) forest landscape	JD Kline, ME Harmon, TA Spies…	2016	Ecological Applications	Forest policymakers and managers have long sought ways to evaluate the capability of forest landscapes to jointly produce timber, habitat, and other ecosystem services in response to forest management. Currently, carbon is of particular interest as policies for increasing carbon storage on federal lands are being proposed. However, a challenge in joint production analysis of forest management is …	Yes	A number of combinations for 10 variables	NA	160000 ha Western Cascade Mountains of Oregon, USA	living trees, litter and deadwood, soil organic carbon	LandCarb	No	No	No	No	No	NA	No
No required data available	Estimating the effect of abandoning coppice management on carbon sequestration by oak forests in Turkey with a modeling approach	J Lee, E Makineci, D Tolunay, Y Son	2018	Science of the Total Environment	A significant area of the oak forests in Turkey has been historically managed by short-rotation coppicing for wood production. Coppice management was almost abandoned in Turkey in 2006 and so investigating its impact on forest carbon (C) sequestration has become an important issue. Therefore, we investigated the net effect of this change in management on C sequestration by oak forests in Turkey u…	Yes	2	100 years	Oak forests in Turkey	aboveground biomass, litter, and mineral soil	Carbon FBDC model	No	No	Yes	No	Yes	NA	No
For calculation	Developing alternative forest spatial management plans when carbon and timber values are considered: A real case from northeastern China	L Dong, W Lu, Z Liu	2018	Ecological Modelling	Forest ecosystems play an important role in mitigating global climate change, and this role has recently been further reinforced by the Paris Agreement. However, our knowledge with respect to the trade-offs between timber production and carbon sequestration in forest ecosystems is still seriously deficient. Therefore, the overall goal of this study is to quantitatively analyze the effects of a se…	Yes	4	50 years	A large forest in northeastern China	above-ground and below-ground biomass of living tree	A spatially explicit management planning model	No	Yes	Yes	No	Yes	50 a	No
No required data available	Determining economically viable forest management option with consideration of ecosystem services in Korea: A strategy after successful national forestation	J Lee, H Kim, C Song, GS Kim, WK Lee, Y Son	2020	Ecosystem Services	Economic assessment of forest management, including tending, thinning, and clear-cut, is essential to maximize social benefits. This study investigated the economic viability of forest management in the Republic of Korea at national scale (2017–2100) by quantitative approaches. The changes in benefits of four ecosystem services (timber production, CO2 sequestration, water yield enhancement, and d…	Yes	?	2017-2100	Republic of Korea	Biomass, litter, dead wood, mineral soil	Forest Biomass and Dead organic matter Carbon (FBDC) model	No	No	No	No	Yes	NA	No
No required data available	Comparison of carbon balance and climate change mitigation potential of forest management strategies in the boreal forest of Quebec (Canada)	L Paradis, E Thiffault, A Achim	2019	Forestry: An International Journal of Forest Research	Management of the world’s forests can play a role for climate change mitigation by increasing CO2 storage in vegetation biomass and harvested wood products, and by displacing CO2-intensive materials such as steel or concrete. This study aimed to determine how management of boreal forest stands could contribute to climate change mitigation in the context of ecosystem-based management. The study wa…	Yes	1+4	199 years	Balsam fir-white birchs stand in the Eastern boreal forest of Quebec, Canada	Soil, buried wood, downed woody debris, stumps, snags, living trees	?	No	No	Yes	No	No	NA	No	The authors likely have the harvest data but it is not provided in the paper.
Article not available	Climate Change, Landowner Preferences and the Future of Private Forests.	JD Henderson	2019	Book Chapter	Climate change and landowner preferences will influence the future of forests, particularly in the US South, an important forested area with a high percentage of private forest landowners. This dissertation examines both issues. We use the SRTS model to examine the consequences of carbon fertilization induced by climate change for pine forests in the US Southeast. We examine this impact in the co…	Yes	4	2100	US Southeast; pine forests		SRTS model, Representative Concentration Pathway (RCP) scenarios 4.5 and 8.5
No required data available	Climate change mitigation in Canada's forest sector: a spatially explicit case study for two regions	CE Smyth, BP Smiley, M Magnan, R Birdsey, AJ Dugan, M Olguin, VS Mascorro, WA Kurz	2018	Carbon Balance and Management	Background We determine the potential of forests and the forest sector to mitigate greenhouse gas (GHG) emissions by changes in management practices and wood use for two regions within Canada’s managed forest from 2018 to 2050. Our modeling frameworks include the Carbon Budget Model of the Canadian Forest Sector, a framework for harvested wood products that estimates emissions based on product ha…	Yes	?	2018-2050	Canada	10 biomass pools and 11 dead organic matter pools	Carbon Budget Model of the Canadian Forest Sector (CBM-CFS3)	No	No	Yes (cumulatively up to 2050)	No	No	NA	No	The authors likely have the harvest data but it is not provided in the paper.
No required data available	Carbon, harvest yields, and residues from restoration in a mixed forest on California's coast range	JP Berrill, HS Han	2016	Forest Science	We simulated growth and yield over a century of restoration activities in a mixed evergreen conifer stand in northern California. Our goal was to compare ecosystem products and services, namely carbon storage, harvest yields, and residue production, among restoration-oriented silvicultural prescriptions promoting conifer dominance. We compared individual-tree selection and group selection with re…	Yes	8	A century	Northern California	Live biomass	FORSEE	No	Yes	Yes	No	No	20, 40, 60, 80, 100	No	Note: above-ground live trees only
For calculation	Carbon stocks and timber harvest. Alternative policy approaches for the Great Bear rainforest and their consequences	VC Griess, CD Man, ME Leclerc, J Tansey, GQ Bull	2019	Forest Policy and Economics	Forest policy-making can be dramatically enhanced by implementing computer based decision support systems (DSS) during the development phase. While stakeholders usually agree on general policy objectives, the best course of action for achieving them is often unclear. Forest DSS can support the assessment of alternative forest policy frameworks with respect to their impact on multiple variables of…	Yes	6	350 years	Great Bear Rainforest in Canada	Aboveground biomass, belowground biomass, and dead organic matter pools	Computer vased decision support system DSS	No	Yes	Yes	No	No	0-350	No
No required data available	Carbon sequestration potential in stands under the grain for green program in southwest China	X Chen, Y Luo, Y Zhou, M Lu	2016	? PloS one ?	The Grain for Green Program (GGP) is the largest afforestation and reforestation project in China in the early part of this century. To assess carbon sequestration in stands under the GGP in Southwest China, the carbon stocks and their annual changes in the GGP stands in the region were estimated based on the following information: (1) collected data on the annually planted area of each tree spec…	Yes	2	2020, 2030, 2040, 2050, 2060	Southwest China	living tree biomass and soil organic matter	?	No	No	Yes	No	Yes	NA	No
No required data available	Biomass and Carbon Dynamics in Forest Management at a Strategic Scale	MA Carle, S D'Amours, R Azouzi	2016	KIRJA	This study explored these two questions: (1) How much carbon can be stored in the forest? and (2) Which forest management regimes best achieve the dual objectives of high sustained timber yield and high carbon sequestration? A model that can be used to predict carbon sequestration potential within a forest region assuming a given management strategy was developed. First, a carbon sequestration un…	Yes	6	?	Québec, Canada	Aboveground living biomass, belowground living biomass, deadwood, litter, and soil organic carbon	Model-III, CBM-CFS3 model	No	Yes	No	No	Yes	NA	No
Article not available	Assessment of Forest Biomass and Carbon Stocks at Stand Level Using Site-Specific Primary Data to Support Forest Management	L Nonini, C Schillaci, M Fiala	2020	Naresuan University Journals	To quantify and map woody biomass (WB) and forest carbon (C) stocks, several models were developed. They differ in terms of scale of application, details related to the input data required and outputs provided. Local Authorities, such as Mountain Communities, can be supported in sustainable forest planning and management by providing specific models in which the reference unit is the same as the …	?	?	?	Lombardy Region Northern Italy	?	WOCAS
For calculation	Carbon balance indicator for forest bioenergy scenarios	K Pingoud, T Ekholm, S Soimakallio, T Helin	2016	GCB Bioenergy	A carbon (C) balance indicator is presented for the evaluation of forest bioenergy scenarios as a means to reduce greenhouse gas (GHG ) emissions. A bioenergy‐intensive scenario with a greater harvest is compared to a baseline scenario. The relative carbon indicator (RC ) is defined as the ratio between the difference in terrestrial C stocks – that is the C debt – and the difference in cumulative…	Yes	2	?	Finland	Living trees, litter and deadwood, soil organic carbon	MELA model	Yes; less harvest	Yes	No	No	Yes	0-30 a	Yes (vary roughly from 1.1-1.2 in t0 to 1.8-2.0 in t30)
No required data available	Climate change mitigation potential in boreal forests: Impacts of management, harvest intensity and use of forest biomass to substitute fossil resources	TK Baul, A Alam, A Ikonen, H Strandman, A Asikainen, H Peltola, A Kilpeläinen	2017	Forests	The impacts of alternative forest management scenarios and harvest intensities on climate change mitigation potential of forest biomass production, utilization and economic profitability of biomass production were studied in three boreal sub-regions in Finland over a 40-year period. Ecosystem modelling and life cycle assessment tools were used to calculate the mitigation potential in substituting…	Yes	?	40 years	Three boreal sub-regions in Finland	Living biomass, deadwood, soil organic carbon	SIMA	No	Yes	No	No	Yes	40a	No
No required data available	Combining Climate Change Mitigation Scenarios with Current Forest Owner Behavior: A Scenario Study from a Region in Southern Sweden	I Lodin, LO Eriksson, N Forsell, A Korosuo	2020	Forests	This study investigates the need for change of current forest management approaches in a southern Swedish region within the context of future climate change mitigation through empirically derived projections, rather than forest management according to silvicultural guidelines. Scenarios indicate that climate change mitigation will increase global wood demand. This might call for adjustments of we…	Yes	3	100-year period	Southern Sweden	standing volumes of living trees (standing stock)	Global Biosphere Management Model (GLOBIUM)	No	Yes (as percentages of first period harvests)	Yes (only for standing stock)	No	No	0-95a	No	The harvest rate of first period not necessarily provided in the paper and may need to be requested from the authors
For calculation	Costs and carbon sequestration potential of alternative forest management measures in Germany	M Bösch, P Elsasser, J Rock, S Rüter, H Weimar…	2017	Forest Policy and Economics	The objective of this study is to assess the costs and the carbon sequestration potential of selected forest management measures in Germany, including effects on the harvested wood products (HWP) pool. We consider five different scenarios, each referring to an alternative level of wood harvests (due to changing rotation lengths or setting forest areas aside). The cost calculation is done within a…	Yes	5	2014-2048	Germany	Physical input-output table PIOT	WoodCarbonMonitor	Yes	Yes	Yes	Yes	Yes	4a/34a	No
No required data available	Ecosystem services of boreal forests–Carbon budget mapping at high resolution	A Akujärvi, A Lehtonen, J Liski	2016	Journal of Environmental Management	The carbon (C) cycle of forests produces ecosystem services (ES) such as climate regulation and timber production. Mapping these ES using simple land cover -based proxies might add remarkable inaccuracy to the estimates. A framework to map the current status of the C budget of boreal forested landscapes was developed. The C stocks of biomass and soil and the annual change in these stocks were qua…	?	?	?	Southern Finland	?	MOTTI, YASSO07	No	No	No	No	No	NA	No
No required data available	Effects of climate change and management on net climate impacts of production and utilization of energy biomass in Norway spruce with stable age‐class distribution	P Torssonen, A Kilpeläinen, H Strandman, S Kellomäki, K Jylhä, A Asikainen, H Peltola	2016	Global Change Biology BIOENERGY	We studied the effects of climate change and forest management scenarios on net climate impacts (radiative forcing) of production and utilization of energy biomass, in a Norway spruce forest area over an 80‐year simulation period in Finnish boreal conditions. A stable age‐class distribution was used in model‐based analyses to identify purely the management effects under the current and changing c…	Yes	?	80 years	Finland	Living biomass, deadwood, soil organic carbon	SIMA	Yes	Yes	No	No	Yes	80a	No
No required data available	Effects of CMIP5 projections on volume growth, carbon stock and timber yield in managed Scots pine, Norway spruce and silver birch stands under southern an northern boreal conditions	L ALRahahleh, A Kilpeläinen, VP Ikonen, H Strandman, A Venäläinen, H Peltola	2018	Forests	We investigated how recent-generation (CMIP5) global climate model projections affect the volume growth, carbon stock, timber yield and its profitability in managed Scots pine, Norway spruce and Silver birch stands on medium fertile upland sites under southern and northern boreal conditions in Finland. Forest ecosystem model simulations were conducted for the current climate and changing climate,…	Yes	3x13x3	90 years	Finland; Scots pine, Norway spruce and Silver birch	Living biomass, deadwood, soil organic carbon	SIMA	No	Yes	Yes	No	No	90a	No
No required data available	Effects of forest conservation and management on volume growth, harvested amount of timber, carbon stock, and amount of deadwood in Finnish boreal forests under changing climate	L Alrahahleh, VP Ikonen, A Kilpeläinen, P Torssonen, H Strandman, A Asikainen, J Kaurola, A Venäläinen, H Peltola	2017	Canadian Journal of Forest Research	We employed a forest ecosystem model (SIMA) to study how the changes in forest conservation area and management affect the volume growth, harvested amount of timber, carbon stock, and amount of deadwood in Finnish boreal upland forests under current and changing climates (RCP4.5 and RCP8.5) over 2010–2099. Simulations were carried out on National Forest Inventory plots using three different fores…	Yes	6	2010-2099	Boreal upland forests in Finland	trees and soil	SIMA	No	Yes	No (transparency issue; difficult to read differences from the figures)	No	No	NA	No
No required data available	Effects of initial age structure of managed Norway spruce forest area on net climate impact of using forest biomass for energy	A Kilpeläinen, H Strandman, T Grönholm, VP Ikonen, P Torssonen, S Kellomäki, H Peltola	2017	BioEnergy Research	We investigated how the initial age structure of a managed, middle boreal (62°N), Norway spruce-dominated (Picea abies L. Karst.) forest area affects the net climate impact of using forest biomass for energy. The model-based analysis used a gap-type forest ecosystem model linked to a life cycle assessment (LCA) tool. The net climate impact of energy biomass refers to the difference in annual net …	Yes	4?	80 years	Spruce forest in Norway	Living biomass, deadwood, soil organic carbon	SIMA	No	Yes (scenarios consider harvest of logging residues only)	No	No	No	NA	No	Note: scenarios consider harvest of logging residues only
No required data available	Effects of using certain tree species in forest regeneration on volume growth, timber yield, and carbon stock of boreal forests in Finland under different CMIP5 projections	L ALRahahleh, A Kilpeläinen, VP Ikonen, H Strandman, A Asikainen, A Venäläinen, J Kaurola, J Kangas, H Peltola	2018	European Journal of Forest Research	We studied how the use of certain tree species in forest regeneration affected the volume growth, timber yield, and carbon stock of boreal forests in Finland under the current climate (1981–2010) and recent-generation global climate model (GCM) predictions (i.e., multi-model means and individual GCMs of CMIP5), using the representative concentration pathways RCP4.5 and RCP8.5 over the period 2010…	Yes	?	2010-2099	Finland	Living biomass, deadwood, soil organic carbon	SIMA	No	No (scenarios consider planting of trees only)	Yes	No	No	NA	No	Note: scenarios consider planting of trees only
Article not available	Energy-climate-forest modelling for integrated policy analysis	R Siljander	2016	?Master's thesis?	Increased concern about global warming has led to an intensified search for new and efficient means to reduce greenhouse gas emissions (GHG). So far, forests have been part of climate policies mainly as a source of bioenergy which can substitute for fossil fuels. However, forests constitute also significant sinks and sources of carbon dioxide, which affect the atmospheric carbon balance. This has…	Yes	?	?	Finland		TIMES model
No required data available	Environmental impacts of various biomass supply chains for the provision of raw wood in Bavaria, Germany, with focus on climate change	D Klein, C Wolf, C Schulz, G Weber-Blaschke	2016	Science of The Total Environment	Wood biomass is considered a renewable raw product, but the supply chain of wood biomass involves non-renewable energy inputs, and thus possibly entailing environmental impacts. The objective of this study was to analyze different environmental impacts (GHG emissions, without biogenic CO2; primary energy consumption, non-renewable; particulate matter) caused by the provision of forest biomass for…	Yes	?	Reference year 2013	Bavaria, Germany	NA	Silva 2.3	No	Only productivity rates and total timber volumes?	No	No	No	NA	No
Article not available	Evaluation of future forest management scenarios for Sweden using process-based ecosystem models	A Sofie Lansø, A Resovsky, M Mishurov, B Guenet, P Peylin, B Smith, J Bergh, N Vuichard, P Messina, J Ryder, K Naudts, YY Chen, J Otto, M McGrath, A Valade, S Luyssaert	2018	? 20th EGU General Assembly ?	LPJ-GUESS and ORCHIDEE-CN-CAN, two state-of-the-art vegetation models, have been further developed, parameterized and validated in order to simulate the interactions between nutrient limitations and forest management and their impact on the carbon cycle. This study builds upon these developments and aims to understanding the impact of forest management and nitrogen limitation on productivity and …	Yes	?	?	Sweden		LPJ-GUESS and ORCHIDEE-CN-CAN models
No required data available	Extent and costs of forest-based climate change mitigation in Germany: accounting for substitution	M Bösch, P Elsasser, J Rock, H Weimar, M Dieter	2019	Carbon Management	The objective of this study is to quantify the contribution of the German forestry to climate change mitigation and to calculate the associated costs at the national level. For that, the forest and harvested wood products carbon pools are considered as well as energy and material substitution. We compare five different scenarios, each referring to an alternative level of timber harvests (due to c…	Yes (based on Bösch et al. in line 49)	5	2014-2048	Germany	NA	NA	No	No	No	No	No	NA	No
Article not available	Forest products: contribution to carbon storage and climate change mitigation	G Cardellini	2018	?PhD Thesis?	Climate change is one of the biggest threats for our earth. Mitigation of climate change is thus an urgent challenge our society needs to take up. Many benefits are provided by forests, and one is their potential to mitigate climate change. This mitigating effect can be achieved in many ways, for example increasing the stock of carbon in managed forests or replacing more emission-intensive goods …	?	?	?	Europe
For calculation	Future management options for cembran pine forests close to the alpine timberline	N Jandl, R Jandl, A Schindlbacher	2018	Annals of Forest Research	Context Presently, many high-elevation forests in the Alps are managed in order to ensure the provision of ecosystem services with emphasis on the minimization of natural hazards. Aims We studied the possible economic performance of a high-elevation protection forest from an owner’s perspective. We investigated whether the increase in productivity due to climate change and a favorable market for …	Yes	2	100 years	Forests in the Alps	?	CÂLDIS	Yes, zero forest management	Yes	Soil carbon pool and simulated growth rate -> is possible to calculate something?	?	No	50a / 100a	No
No required data available	How considering multiple criteria, uncertainty scenarios and biological interactions may influence the optimal silvicultural strategy for a mixed forest	T Knoke, M Kindu, I Jarisch, E Gosling…	2020	Forest Policy and Economics	Assessing pre-defined strategies remains the status quo for studies supporting silvicultural decision-making for future forest management, yet, such strategies may not fully address decision-makers' preferences and uncertainty attitudes. We develop a continuous stand-level optimisation approach that integrates multiple decision criteria, uncertain input data based on ellipsoidal uncertainty sets …	Yes (harvest vary in time between scenarios)	4	120 years	No country; Norway spruce, Silver fir, European beech	aboveground biomass	?	No	No (harvest takes place in different points in time in different scenarios)	Yes	No (harvest takes place in different points in time in different scenarios)	No	NA	No
No required data available	Integrated management of forest ecosystem services: An optimization model based on multi-objective analysis and metaheuristic approach	S Sacchelli, I Bernetti	2019	Natural Resources Research	The goal of this research was to implement an optimization model that allows definition of best management strategies in the forest sector. The case study is depicted in a coniferous stand (silver fir—Abies alba Mill.) of Tuscany (central Italy). Four ecosystem services were quantified from biophysical (timber produced, carbon stored, ecosystem diversity, recreational function) and economic (tota…	NA	NA	?	Silver fir of Tuscany, Italy	?	?	No	No	No	No	No	NA	No
Article not available	Managing mixed stands can mitigate severe climate change impacts on ecosystem functioning	M Jourdan, T Cordonnier, P Dreyfus, C Riond, F de Coligny, X Morin	2020	bioRxiv The preprint server for biology	Climate change affects forest ecosystem processes and related services due to increasing temperature and increasing extreme drought event frequency. This effect can be direct through the alteration of the physiological responses of trees, but also indirect, by modifying interactions between trees and thus changing communities’ composition. Such changes might affect species richness with high impa…	Yes	6	150 years	French Alps	RCP 8.5
No required data available	Modeling the influence of alternative forest management scenarios on wood production and carbon storage: A case study in the Mediterranean region	F Bottalico, L Pesola, M Vizzarri, L Antonello…	2016	Environmental Research	Forest ecosystems are fundamental for the terrestrial biosphere as they deliver multiple essential ecosystem services (ES). In environmental management, understanding ES distribution and interactions and assessing the economic value of forest ES represent future challenges. In this study, we developed a spatially explicit method based on a multi-scale approach (MiMoSe-Multiscale Mapping of ecoSys…	Yes	3	20 years	Molise region, Central Italy	Above- and below-ground biomass, dead organic matter, soil organic carbon	GIS-based model, InVEST model	Yes BAU	No	No	No	No	NA	No
No required data available	Modelling forest carbon stock changes as affected by harvest and natural disturbances. II. EU-level analysis	R Pilli, G Grassi, WA Kurz, JV Moris…	2016	Carbon Balance and Management	Forests and the forest sector may play an important role in mitigating climate change. The Paris Agreement and the recent legislative proposal to include the land use sector in the EU 2030 climate targets reflect this expectation. However, greater confidence on estimates from national greenhouse gas inventories (GHGI) and more comprehensive analyses of mitigation options are needed to seize this …	Yes	1	2000-2012	EU	total living biomass, dead organic matter, mineral soil	Carbon Budget Model CBM	No	No	No	No	No	NA	No	Only absolute historical data set for harvests and carbon stocks provided.
No required data available	Modelling the impacts of intensifying forest management on carbon budget across a long latitudinal gradient in Europe	A Akujärvi, A Shvidenko…	2019	Environmental Research Letters	Global wood demand is projected to increase with accompanying intensification in forest management practices. There are concerns that intensive management practices such as whole-tree harvest (WTH) and shortened rotation lengths could risk the long-term productivity and carbon sink capacity of forest ecosystems. The historical (1915–2005) and future (2005–2095) development of five Scots pine (Pin…	NA	NA	2005-2095	Europe; Scots pine and Norway spruce	Biomass, litter and soil	BGC-MAN, Yasso15	No	No	Yes	No	No	NA	No	Note: the authors may have the harvest rate data but it is not provided in the paper. Comparison between shortened and longer rotation period could provide relevant information on carbon impacts of increased stem wood harvest.
No required data available	Quantifying the missing link between forest albedo and productivity in the boreal zone	A Hovi, J Liang, L Korhonen, H Kobayashi, M Rautiainen	2016	Biogeosciences	Albedo and fraction of absorbed photosynthetically active radiation (FAPAR) determine the shortwave radiation balance and productivity of forests. Currently, the physical link between forest albedo and productivity is poorly understood, yet it is crucial for designing optimal forest management strategies for mitigating climate change. We investigated the relationships between boreal forest struct…	?	?	?	Finland and Alaska	NA	A radiative transfer model Forest Reflectance and Transmittance model FRT	No	No	No	No	No	NA	No
For calculation	Regional effects of alternative climate change and management scenarios on timber production, economic profitability, and carbon stocks in Norway spruce forests in Finland	A. Zubizarreta-Gerendiain, J. Garcia-Gonzalo, H. Strandman, K. Jylhä, H. Peltola	2016	Canadian Journal of Forest Research	We studied regional effects of alternative climate change and management scenarios on timber production, its economic profitability (net present value (NPV), with 2% interest rate), and carbon stocks over a 90 year simulation period in Norway spruce (Picea abies (L.) Karst.) forests located in southern, central, and northern Finland. We also compared the results of optimised management plans (max…	Yes	3	90 years	Norway spruce in southern, central and northern Finland	soil and trees (stem, branches andfoliage, and coarse and fine roots)	SIMA	Yes, baseline	Yes	Yes	Yes	No	10a / 90a	No
No required data available	Sensitivity of 21st century simulated ecosystem indicators to model parameters, prescribed climate drivers, RCP scenarios and forest management actions for two Finnish boreal forest sites	J Makela, F Minunno, T Aalto, A Makela, T Markkanen, M Peltoniemi	2020	Biogeosciences	Forest ecosystems are already responding to changing environmental conditions that are driven by increased atmospheric CO2 concentrations. These developments affect how societies can utilise and benefit from the woodland areas in the future, be it for example climate change mitigation as carbon sinks, lumber for wood industry, or preserved for nature tourism and recreational activities. We assess…	Yes	2+	1980-2100	Two boreal forest sites Hyytiälä and Sodankylä in Finland	Stand volume	The land ecosystem model JSBACH and the forest growth model PREBAS (PREBAS applied to study the impacts of forest management)	No	Yes	No	No	No	30a, 60a, 90a	No	Only stand volumes provided. The authors may have carbon stock data but it is not provided in the paper.
No required data available	Shifting from even-aged management to less intensive forestry in varying proportions of forest land in Finland: Impacts on carbon storage, harvest removals and harvesting costs	J Vauhkonen, T Packalen	2019	European Journal of Forest Research	Many studies have reported increased multi-functionality and financial profits due to a shift from even- to uneven-aged forest management. However, little is known (from long-term experiences or predictions) how alternative management systems could affect national-scale wood production and carbon storage, if adopted over very large areas. We analysed these effects using an area-based framework, i…	?	?	?	Finland	The total above- and below-ground biomass	Markov chain models	No	Yes (but in absolute terms only for BAU and different land transition options)	Yes	No	No	NA	No	Harvest rates are provided in relative terms for scenarios but it is not clear what is the basis for such figures.
No required data available	Strategies for Climate-Smart Forest Management in Austria	R Jandl, T Ledermann, G Kindermann, A Freudenschuss, T Gschwantner, P Weiss	2018	Forests	We simulated Austrian forests under different sustainable management scenarios. A reference scenario was compared to scenarios focusing on the provision of bioenergy, enhancing the delivery of wood products, and reduced harvesting rates. The standing stock of the stem biomass, carbon in stems, and the soil carbon pool were calculated for the period 2010–2100. We used the forest growth model Câldi…	Yes	6	2010-2100	Austria	Standing stock, stem wood	Growth model Caldis and the soil carbon model Yasso07	Yes, BAU	No	Yes (only for standing stock)	No	No	NA	No
No required data available	The potential role of forest management in Swedish scenarios towards climate neutrality by mid century	O Cintas, G Berndes, J Hansson, BC Poudel…	2017	Forest Ecology and Management	Swedish climate policy targets net zero greenhouse gases (GHG) by mid-century, with road transport independent of fossil fuels by 2030, requiring far-reaching changes in the way energy is used. Forest management is expected to support carbon sequestration and provide biomass for various uses, including energy. In this paper, we combine two energy scenarios with four forest scenarios and quantify …	Yes	2+4	Until 2030?	Sweden	biomass and soil	?	No	No (but stated to be derived from Lundmark et al. 2014)	No	No	Yes	0-40a	No	Note: subject to the availability of harvest data in Lundmark et al. 2014
Article not available	Trade-off analysis of forest ecosystem services–A modelling approach	X Pang	2017	Doctoral Thesis	Forest is a resource that is increasingly utilized for multiple purposes. The balance between energy demands and the long-term capacity of ecosystems to support biodiversity and other ecosystem services is crucial. The aim of this project was to increase the knowledge on and to develop methods and tools for trade-offs and synergies analysis among forest ecosystem services based on different fores…	Yes	?		Kronoberg County, Sweden	Landscape simulation and Ecological Assessment (LEcA) tool
For calculation	Trade-offs and synergies among ecosystem services under different forest management scenarios–The LEcA tool	X Pang, EM Nordström, H Böttcher, R Trubins…	2017	Ecosystem Services	Forests provide a multitude of ecosystem services. In Sweden, the goal to replace fossil fuels could induce substantial changes in the current management and use of forests. Therefore, methods and tools are needed to assess synergies and trade-offs between ecosystem services for policy and planning alternatives. The aim of this study was to develop methods for integrated sustainability assessment…	Yes	2	100 years	Sweden	Above-ground biomass	Landscape simulation and Ecological Assessment (LEcA)	Yes	Yes	Yes	Yes	No	0-100a	No
No required data available	Trade-offs between forest carbon stocks and harvest in a steady state - A multicriteria analysis	K Pingoud, T Ekholm, R Sievänen, S Huuskonen…	2018	Journal of Environmental Management	This paper provides a perspective for comparing trade-offs between harvested wood flows and forest carbon stocks with different forest management regimes. A constant management regime applied to a forest area with an even age-class distribution leads to a steady state, in which the annual harvest and carbon stocks remain constant over time. As both are desirable – carbon stocks for mitigating cli…	Yes	?	30-40, 100 years	Finland	Above and below ground living biomass, dead wood, soil organic carbon	Pareto-optimal	No	No	No	No	No	NA	No
No required data available	Transformation scenarios towards a low-carbon bioeconomy in Austria	G Kalt, M Baumann, C Lauk, T Kastner, L Kranzl, F Schipfer, M Lexer, W Rammer, A Schaumberger, E Schriefl	2016	Energy Strategy Reviews	The transformation towards a low-carbon bioeconomy until 2050 is one of the main strategic long-term targets of the European Union. This work presents transformation scenarios for the case of Austria with GHG reduction to about 20% of Kyoto baseline. The scenarios are developed with an optimization model integrating the energy sector, land use and biomass flows. Focus is on investigating possible…	Yes	3	Until 2050	Austria	NA	PICUS	No	No	No	No	No	NA	No
For calculation	Voluntary carbon credits from improved forest management: policy guidelines and case study	G Vacchiano, R Berretti, R Romano, R Motta	2018	Biogeoschiences and Forestry	Human activities have the potential to enhance carbon sequestration by the world’s forests and contribute to climate change mitigation. Voluntary carbon trading is currently the only option to pursue and reward carbon sequestration by forestry activities. Carbon credits for enhanced sequestration can be sold to partners wishing to offset their own emissions. Here we illustrate the steps taken to …	Yes	2 +	20 years	Beech and chestnut in southern part of the Piemonte region, Italy	Aboveground carbon	?	Yes, baseline	Yes	Yes	Yes	No	20a	No
Article not available	The studies on promoting forest carbon sequestration to meet Paris climate agreement targets	S Hyun-deok, A Hyunjin, C Junyeong, I Muhammad, T Diego	2016	?	The new emission standards from the Paris agreement presented us with many challenges. Since the role of developing countries in responding to climate change is becoming more significant, Korea, which has not been obliged to reduce climate change so far, should prepare groundbreaking carbon reduction strategies. In addition, we need to strengthen international cooperation to arrive at global solu…	?	?	?	Costa Rica		Linear programing (LP) model

## Sheet: Articles for calculations
Number	Title	Authors	Year	Journal	Abstract	Number of scenarios	Time period	Country / location	Which forest carbon stocks are included?	Simulation model	Is the difference in harvest rate between the scenarios compared <5%?	Is fertilisation rate or tree species and the related tree growth rate explicitly different between the scenarios compared?	Is the impact of climate change explicitly different between the scenarios compared?	Is forest area explicitly different between the scenarios compared?
1	Exploring the effects of climate change mitigation scenarios on timber, water, biodiversity and carbon values: A case study in Pozantı planning unit, Turkey	Baskent EZ	2019	Journal of Environmental Management	This study evaluated the performance of three climate change mitigation management scenarios; business as usual (BAU), low intensity management (LIM) and high intensity management (HIM) to provide ecosystem services. ETCAP simulation model was used to forecast forest development for Pozantı area with 17,603 ha forests in Turkey. Wood production, biodiversity conservation, carbon sequestration and…	3	80a	Pozanti, Turkey	Above and below-ground biomass, deadwood	ETCAP	Yes	Yes	Yes	Yes
2	Climate Change Mitigation Potential in Boreal Forests: Impacts of Management, Harvest Intensity and Use of Forest Biomass to Substitute Fossil Resources	Baul et al.	2017	Forests (ISSN 1999-4907)	The impacts of alternative forest management scenarios and harvest intensities on climate change mitigation potential of forest biomass production, utilization and economic profitability of biomass production were studied in three boreal sub-regions in Finland over a 40-year period. Ecosystem modelling and life cycle assessment tools were used to calculate the mitigation potential in substituting…	18 (x3 south, west, east)	40a	Finland	Above and below ground living biomass, soil organic matter (litter and humus)	SIMA	Yes, in two scenario comparisons (T26-T26-, T26-T26-).	No	No	No
3	Costs and carbon sequestration potential of alternative forest management measures in Germany	Bösch M, Elsasser P, Rock J, Rüter S, Weimar	2017	Forest Policy and Economics	The objective of this study is to assess the costs and the carbon sequestration potential of selected forest management measures in Germany, including effects on the harvested wood products (HWP) pool. We consider five different scenarios, each referring to an alternative level of wood harvests (due to changing rotation lengths or setting forest areas aside). The cost calculation is done within a…	5	2014-2048	Germany	Trees, above ground C, below ground C, dead wood	WEHAM	No	No	No	No
4	Forest management scenarios in a changing climate: trade‐offs between carbon, timber, and old forest	Creutzburg MK, Scheller RM, Lucash MS, LeDuc SD, Johnson MG	2016	Ecological Applications	Balancing economic, ecological, and social values has long been a challenge in the forests of the Pacific Northwest, where conflict over timber harvest and old‐growth habitat on public lands has been contentious for the past several decades. The Northwest Forest Plan, adopted two decades ago to guide management on federal lands, is currently being revised as the region searches for a balance betw…	4	100 years	Pacific Northwest, Oregon Coast Range	Above ground and below ground biomass	LANDIS-II forest simulation model	Yes, in two scenario comparisons (BAU-Low harvest, BAU-Ecological forestry)	No	All	No
5	Tradeoffs in Timber, Carbon, and Cash Flow under Alternative Management Systems for Douglas-Fir in the Pacific Northwest	Diaz DD, Loreno S, Ettl GJ, Davies B	2018	Forests	Forest management choices offer significant potential to mitigate global climate change and biodiversity loss. To illuminate tradeoffs relevant to policymakers, forest sector stakeholders, and consumers of forest products, we utilize three Key Performance Indicators—average carbon storage in the forest and wood products; cumulative timber output; and discounted cash flow—to compare four alternati…	4	100 years	Douglas-fir forests on 64 parcels across western Oregon and Washington	Above- and below-ground biomass of live trees, standing biomass of dead trees	Forest Vegetation Simulator (FVS-PN)	No	No	No	No
6	Developing alternative forest spatial management plans when carbon and timber values are considered: A real case from northeastern China	Dong L, Lu W, Liu Z	2018	Ecological Modelling	Forest ecosystems play an important role in mitigating global climate change, and this role has recently been further reinforced by the Paris Agreement. However, our knowledge with respect to the trade-offs between timber production and carbon sequestration in forest ecosystems is still seriously deficient. Therefore, the overall goal of this study is to quantitatively analyze the effects of a se…	4	50 years	A large forest in northeastern China	Above-ground and below-ground biomass of living trees with a DBH greater than 5 cm	Stand level growth and yield model system by Wang (2012)	Yes, in two scenario comparisons ($0-$60, $0-$100, $0-$200)	No	No	No
7	Carbon stocks and timber harvest. Alternative policy approaches for the Great Bear rainforest and their consequences	Griess VC, Man CD, Leclerc ME, Tansey J, Bull QC	2019	Forest Policy and Economics	Forest policy-making can be dramatically enhanced by implementing computer based decision support systems (DSS) during the development phase. While stakeholders usually agree on general policy objectives, the best course of action for achieving them is often unclear. Forest DSS can support the assessment of alternative forest policy frameworks with respect to their impact on multiple variables of…	6	350 years	Great Bear Rainforest in Canada	Aboveground biomass, belowground biomass, and dead organic matter pools	Computer vased decision support system DSS	No	Yes	No	No
8	Climate change effects of forestry and substitution of carbon-intensive materials and fossil fuels	Gustavsson L, Haus S, Lundblad M	2017	Renewable and Sustainable Energy Reviews	We estimate the climate effects of directing forest management in Sweden towards increased carbon storage in forests with more land set-aside for protection, or towards increased forest production for the substitution of carbon-intensive materials and fossil fuels, relative to a reference case of current forest management. We develop various scenarios of forest management and biomass use to estim…	3	100 years	Sweden	Living tree biomass and soil	Heureka Regwise simulator	No	Yes, in BAU-Production scenario comparison	Yes	No
9	Future management options for cembran pine forests close to the alpine timberline	Jandl N, Jandl R, Schindlbacher A	2018	Annals of Forest Research	Context Presently, many high-elevation forests in the Alps are managed in order to ensure the provision of ecosystem services with emphasis on the minimization of natural hazards. Aims We studied the possible economic performance of a high-elevation protection forest from an owner’s perspective. We investigated whether the increase in productivity due to climate change and a favorable market for …	2	100 years	Forests in the Alps, Austria	Aboveground biomass and soil	Caldis for trees, Yasso07 for soil C	No	No	All	No
10	Optimal strategies for integrated forest management in megacities combined with wood and carbon services	Li H, Liu G, Liu Y, Zhu Y, Yang X	2019	Journal of Cleaner Production	Based on a simulated annealing algorithm, this study empirically determined the optimal stand-level forest management strategies for the Miyun Reservoir Catchment (MRC), the important protective screen and ecosystem service provider for Beijing City. The optimization results of wood provisioning indicate that the objective yield can be more effectively and sustainably attained over longer plannin…	3	50-100 years	Beijing City	Aboveground and belowground biomass	Annealing algorithm	No	No	No	No
11	Carbon balance indicator for forest bioenergy scenarios	Pingoud K, Ekholm T, Soimakallio S, Helin T	2016	GCB Bioenergy	A carbon (C) balance indicator is presented for the evaluation of forest bioenergy scenarios as a means to reduce greenhouse gas (GHG ) emissions. A bioenergy‐intensive scenario with a greater harvest is compared to a baseline scenario. The relative carbon indicator (RC ) is defined as the ratio between the difference in terrestrial C stocks – that is the C debt – and the difference in cumulative…	4	30 years	Finland	Living trees, litter and deadwood, soil organic carbon	MELA model	No	No	All	No
12	Scenario analysis using carbon budget modelling for alternative forest management strategies in Turkey: the case study of Arikaya	Satir E	2018	Thesis / Dissertation	Increasing carbon stock in forests is fundamental for climate change mitigation. Forest carbon management can also play a critical role in keeping forests healthy, while addressing multiple wildlife and human needs. To fulfill this potential, forest management practices require an improved understanding of annual carbon stocks and carbon dynamics. However, this information is oftentimes not prope…	4	100 years	Turkey	Above- and below-ground biomass and dead organic matter, including soil	The Forest Planning Studios Atlas (FPS-Atlas) and the Carbon Budget Model of the Canadian Forest Service (CBM-CFS3)	No	No	No	Yes, in 2 scenarios which were excluded (afforestation)
13	Climate change mitigation challenge for wood utilization - The case of Finland	Soimakallio S, Saikku L, Valsta L, Pingoud K	2016	Environmental Science & Technology	The urgent need to mitigate climate change invokes both opportunities and challenges for forest biomass utilization. Fossil fuels can be substituted by using wood products in place of alternative materials and energy, but wood harvesting reduces forest carbon sink and processing of wood products requires material and energy inputs. We assessed the extended life cycle carbon emissions considering …	6	100 years	Finland	Living trees, litter and deadwood	MOTTI model results based on Hynynen et al. (2015), Helin et al. (2016)	No	No	No	No
14	Regional effects of alternative climate change and management scenarios on timber production, economic profitability, and carbon stocks in Norway spruce forests in Finland	Zubizarreta-Gerendiain A, Garcia-Gonzalo J, Strandman H, Jylhä K, Peltola H	2016	Canadian Journal of Forest Research	We studied regional effects of alternative climate change and management scenarios on timber production, its economic profitability (net present value (NPV), with 2% interest rate), and carbon stocks over a 90 year simulation period in Norway spruce (Picea abies (L.) Karst.) forests located in southern, central, and northern Finland. We also compared the results of optimised management plans (max…	3	90 years	Finland	Trees, soil	SIMA	Yes, in two scenario comparisons (70base-70heavy: Current climate, Southern Finland, 70base-70light: Current climate, Southern Finland)	No	No	No
	Studies added to those of the systematic review following this line
15	Long-term impacts of increased timber harvests on ecosystem services and biodiversity: A scenario study based on national forest inventory data	Blattert et al.	2020	Ecosystem services	The transition to a climate-neutral economy is expected to increase future timber demands and endanger the multi_x0002_functionality of forests. National scenario analyses are needed to determine long-term forest management impacts and support forest policy making in defining guidelines for the sustainable provision of forests’ ecosystem services and biodiversity (ESB). Using national forestry in…	5	90a	Switzerland	Aboveground and belowground biomass, deadwood	MASSIMO	No	Yes	No	No
16	Uncertainty analysis of climate change mitigation options in the forestry sector using a generic carbon budget model	Böttcher et al.	2008	Ecological Modelling 213	Industrialized countries agreed on a reduction of greenhouse gas emissions under the Kyoto Protocol. Many countries elected forest management activities and the resulting net balance of carbon emissions and removals of non-CO2 greenhouse gases by forest management in their climate change mitigation measures. In this paper a generic dynamic forestry model (FORMICA) is presented. It has an empirica…	3	40	Germany, Thuringia	Above- and below-ground C, including soil and litter	FORMICA	No	Yes (scenario 3)	No	No
17	Forest Vision Germany - Description of methodology, assumptions and results	Böttcher, H., Hennenberg, K.J., Winger, C.	2018	Öko-Institut, Berlin 26 February 2018	Available at: https://www.oeko.de/fileadmin/oekodoc/Forest-Vision-Methods-and-Results.pdf	3	30a	Germany	Above- and below-groung biomass, deadwood, soil organic carbon	Fabio, Yasso05	No	No	No	No
18	Assessing the greenhouse gas effects of harvested wood products manufactured from managed forests in Canada	Chen, J., Ter-Mikaelian, M.T., Yang, H. and Colombo, S.J.	2018	Forestry: An International Journal of Forest Research 91, 193-205.	We developed a life-cycle analysis (LCA) system to quantify the carbon dynamics for Canadian-made harvested wood products (HWP). We considered the carbon stocks of HWP in use and in landfills/dumps, emissions reduced by substituting HWP for non-wood construction materials, HWP production emissions and methane emissions from decomposing wood disposed of in landfills. Carbon dynamics analyses were …	5 HWP scenarios	100 years	Canada	Live tree, standing dead tree, forest floor, down dead wood, understory vegetation and soil	HWP-CASE and FORCARB-ON2 models	No	No	No	No
19	Climate effects of forestry and substitution of concrete buildings and fossil energy	Gustavsson et al.	2021	Renewable and Sustainable Energy Reviews	Forests can help mitigate climate change in different ways, such as by storing carbon in forest ecosystems, and by producing a renewable supply of material and energy products. We analyse the climate implications of different scenarios for forestry, bioenergy and wood construction. We consider three main forestry scenarios for Kronoberg County in Sweden, over a 201-year period. The Business-as-us…	3	201a	Sweden	Soil, deadwood, living biomass	The Heureka Regwise simulator is used to model forest development and harvest. Soil carbon stock estimates are based on the Q model	No	Yes on production scenarios. Production scenario uses higher management intensity such as species selection and fertilization to increase forest growth level by 40% after 100 years.	Yes, RCP4.5 in all	No
20	Balancing trade-offs between ecosystem services in Germany’s forests under climate change	Gutsch et al. 2018	2018	Environmental Research Letters	Germany’s forests provide a variety of ecosystem services. Sustainable forest management aims to optimize the provision of these services at regional level. However, climate change will impact forest ecosystems and subsequently ecosystem services. The objective of this study is to quantify the effects of two alternative management scenarios and climate impacts on forest variables indicative of ec…	4	35a	Germany	Above- and below-ground C, including soil and litter	4C (FORESEE–FORESt Ecosystems in a Changing Environment)	No	No	No	No
21	Scenario analyses for the effects of harvesting intensity on development of forest resources, timber supply, carbon balance and biodiversity of Finnish forestry	Heinonen et al.	2017	Forest Policy and Economics	We used national scenario analyses to examine the effects of harvesting intensity on the development of forest resources, timber supply, carbon balance, and biodiversity indicators of Finnish forestry in nine 10-year simulation periods (90-year simulation period) under the current climate. Data from the 11th National Forest Inventory of Finland were used to develop five even-flow harvesting scena…	5	1-90a	Finland	Living biomass, soil organic matter	Yasso07	No	No	No	No
22	Global warming potentials of stemwood used for energy and materials in Southern Finland: differentiation of impacts based on type of harvest and product lifetime	Helin, T., Salminen, H., Hynynen, J., Soimakallio, S., Huuskonen, S. and Pingoud, K.	2016	Gcb Bioenergy, 8(2), pp.334-345.	Wood harvesting in boreal forests typically consists of sequential harvesting operations within a rotation: a few thinnings and a final felling. The aim of this paper is to model differentiated relative global warming potential (GWP) coefficients for stemwood use from different thinnings and final fellings, and correction factors for long‐lived wood products, potentially applicable in life cycle …	4	100 years	Southern Finland	Living and dead biomasses	MOTTI	No	No	No	No
23	Harvesting in boreal forests and the biofuel carbon debt	Holtsmark	2012	Climatic Change	Owing to the extensive critique of food-crop-based biofuels, attention has turned toward second-generation wood-based biofuels. A question is therefore whether timber taken from the vast boreal forests on an increasing scale should serve as a source of wood-based biofuels and whether this will be effective climate policy. In a typical boreal forest, it takes 70–120 years before a stand of trees i…	2	2005-2300	Norway, "Relevant to boreal forests"	Living biomass, dead wood	Not specified	No	No	No	No
24	Long-term impacts of forest management on biomass supply and forest resource development: a scenario analysis for Finland	Hynynen et al. 2015	2015	European Journal of Forest Research	A national-level scenario analysis was conducted to comprehensively assess the long-term impacts of alternative forest management strategies on potential Finnish forest resource use. Four scenarios with varying management intensities were defined. The future development of forest resources under specific forest management schedules in accordance with the given scenarios was subsequently predicted…	4	1-100a	Finland	Growing stock and dead wood, including logging residues and natural mortality	MOTTI	Yes, in one scenario comparison (BAU-EXT)	Yes, fertilization and genetically improved planting material in INT and QLTY.	No	No
25	A new way of carbon accounting emphasises the crucial role of sustainable timber use for successful carbon mitigation strategies	Härtl, F.H., Höllerl, S. and Knoke, T.	2017	Mitigation and Adaptation Strategies for Global Change 22, 1163-1192.	The roles of forest management and the use of timber for energy in the global carbon cycle are discussed. Recent studies assert that past forest management has been accelerating climate change, for example in Europe. In addition, the increasing tendency to burn timber is an international concern. Here, we show a new way of carbon accounting considering the use of timber as a carbon neutral transf…	4	2010-2040	Germany	Living biomass: the volume of above ground wood that is over 7 cm in diameter	YAFO	Yes, in two scenario comparisons (A0-A100, A0-A300)	No	N/A	No
26	Strategies for Climate-Smart Forest Management in Austria	Jandl et al.	2018	Forests	We simulated Austrian forests under different sustainable management scenarios. A reference scenario was compared to scenarios focusing on the provision of bioenergy, enhancing the delivery of wood products, and reduced harvesting rates. The standing stock of the stem biomass, carbon in stems, and the soil carbon pool were calculated for the period 2010–2100. We used the forest growth model Câldi…	5	80a	Austria	Stem biomass, soil	Caldis for trees, Yasso07 for soil C	Yes, in three scenario comparisons. In BAU-1b and BAU-1c datapoints for long have a harvest difference >5%.	No	No	No
27	The Effect of Harvesting on National Forest Carbon Sinks up to 2050 Simulated by the CBM-CFS3 Model: A Case Study from Slovenia	Jevsenak et al.	2020	Forests	With the advent of global warming, forests are becoming an increasingly important carbon sink that can mitigate the negative effects of climate change. An understanding of the carbon dynamics of forests is, therefore, crucial to implement appropriate forest management strategies and to meet the expectations of the Paris Agreement with respect to international reporting schemes. One of the most fr…	5	36a	Slovenia	Aboveground, belowground, deadwood, litter, soil	CBM-CFS3	No	No	No	No
28	Modeling the CO 2-effects of forest management and wood usage on a regional basis	Knauf et al.	2015	Carbon Balance Manag	Background: At the 15th Conference of Parties of the UN Framework Convention on Climate Change, Copenhagen, 2009, harvested wood products were identified as an additional carbon pool. This modification eliminates inconsistencies in greenhouse gas reporting by recognizing the role of the forest and timber sector in the global carbon cycle. Any additional CO2-effects related to wood usage are not c…	3	90a	Germany	Above and below ground biomass	Developed, based on the forest management and wood usage data from the German state of North Rhine-Westphalia	No	No	No	No
29	A regional assessment of land‐based carbon mitigation potentials: bioenergy, BECCS, reforestation, and forest management	Krause, Knoke and Rammig	2020	GCB-Bioenergy	Land‐based solutions are indispensable features of most climate mitigation scenarios. Here we conduct a novel cross‐sectoral assessment of regional carbon mitigation potential by running an ecosystem model with an explicit representation of forest structure and climate impacts for Bavaria, Germany, as a case study. We drive the model with four high‐resolution climate projections (EURO‐CORDEX) for…	2	80a	Germany	Vegetation, soil	LPJ‐GUESS	No	No	No	No
30	Russian forests and climate change	Leskinen et al.	2020	What Science Can Tell Us		8	40a	Russia	Living biomass	EFISCEN	Yes, in one scenario comparison (Reference-CSF 2)	Yes	No	No
31	Klimaschutzwirkung des Wald- und Holzsektors: Schutz- und Nutzungsszenarien für drei Modellregionen in Thüringen	Mund et al.	2015	BfN-Skripten 396		3	30a	Germany	Living and dead biomass	SILVA	No	No	No	No
32	Die alternativen WEHAM-Szenarien: Holzpräferenz, Naturschutzpräferenz und Trendfortschreibung	Ohmichen et al.	2018	Thünen Report 59		2	30a	Germany	Living biomass	WEHAM	No	No	No	No
33	Applying a systems approach to assess carbon emission reductions from climate change mitigation in Mexico’s forest sector	Olguin, M., Wayson, C., Fellows, M., Birdsey, R., Smyth, C., E., Magnan, M., Dugan, A.J., Mascorro, V.S., Alanís, A., Serrano, E. and Kurz, W., A.	2018	Environmental Research Letters 13, 035003.	The Paris Agreement of the United Nation Framework Convention on Climate Change calls for a balance of anthropogenic greenhouse emissions and removals in the latter part of this century. Mexico indicated in its Intended Nationally Determined Contribution and its Climate Change Mid-Century Strategy that the land sector will contribute to meeting GHG emission reduction goals. Since 2012, the Mexica…	2 (4)	30 years	Mexico	Above- and belowground biomass, dead wood, litter and mineral soil forest carbon pools	Carbon Budget Model of the Canadian Forest Sector and a harvested wood products model	No	No	Yes	No
34	Trade-offs and synergies among ecosystem services under different forest management scenarios – The LEcA tool	Pang et al.	2017	Ecosystem Services	Forests provide a multitude of ecosystem services. In Sweden, the goal to replace fossil fuels could induce substantial changes in the current management and use of forests. Therefore, methods and tools are needed to assess synergies and trade-offs between ecosystem services for policy and planning alterna_x0002_tives. The aim of this study was to develop methods for integrated sustainability ass…	2	100a	Kronoberg county	Aboveground biomass	LEcA Tool	No	No	No	No
35	The European forest sector: past and future carbon budget and fluxes under different management scenarios	Pilli et al.	2017	Biogeosciences, 14, 2387–2405, 2017	The comprehensive analysis of carbon stocks and fluxes of managed European forests is a prerequisite to quantify their role in biomass production and climate change mitigation. We applied the Carbon Budget Model (CBM) to 26 European countries, parameterized with country information on the historical forest age structure, management practices, harvest regimes and the main natural disturbances. We …	3	2012-2030	EU 26	Above- and belowground biomass, dead wood, litter and soil	Carbon Budget Model (CBM)	No	No	No	No
36	Does management improve the carbon balance of forestry?	Pukkala	2017	Forestry	The long-term carbon balance (CB) of unmanaged forest was compared to the CBs of management scenarios which included cuttings. The calculations were done for a typical forest holding representing mineral soil sites in Central Finland. CB was calculated for twenty-one 10-year periods. Three carbon stores and sub-balances were included in the analysis: (1) below- and above-ground biomass of living …	4	210a	Finland	Above- and belowground biomass of living trees, forest soil (dead carbon matter)	Monsu, Yasso07	No	No	No	No
37	Carbon forestry is surprising	Pukkala	2018	Forest Ecosystems	Background: Forestry offers possibilities to sequestrate carbon in living biomass, deadwood and forest soil, as well as in products prepared of wood. In addition, the use of wood may reduce carbon emissions from fossil fuels. However, harvesting decreases the carbon stocks of forests and increases emissions from decomposing harvest residues. Methods: This study used simulation and optimization to…	4	0-100y	Finland	Living and dead biomass	Pukkala et al. 2013, Yasso07	No	No	No	No
38	ClimWood2030 ‘Climate benefits of material substitution by forest biomass and harvested wood products: Perspective 2030’	Rüter et al. 2016	2016	Report	The ClimWood2030 study, commissioned by DG CLIMA of the European Commission, quantifies the five ways in which the EU forest sector contributes to climate change mitigation: carbon se_x0002_questration and storage in EU forests, carbon storage in harvested wood products in the EU, sub_x0002_stitution of wood products for functionally equivalent materials and substitution of wood for other sources…	5	20a	EU28	Living (branches, leaves or needles and roots) and dead (dead wood, litter) biomass and soils	GLOBIOM	Yes, in one scenario comparison (BAU-INT)	No	No	Yes (AR and deforestation is included)
39	Assessing trade-offs between carbon sequestration and timber production within a framework of multi-purpose forestry in Austria	Seidl et al.	2007	Forest Ecology and Management	Numerous studies have analyzed the carbon sequestration potential of forests and forest management. However, most studies either focused on national and supra-national scales or on the project level in the context of the flexible mechanisms of the Kyoto Protocol. Few studies are available which analyze the effects of alternative silvicultural strategies on carbon sequestration, timber production …	4	100y	Austria	Aboveground (stem-, branch-, leaf-, and standing deadwood) and belowground (soil organic carbon, litter, humified matter, fine woody debris and downed dead wood	PICUS v1.4	No	No	No	No
40	Effect of increased wood harvesting and utilization on required greenhouse gas displacement factors of wood-based products and fuels	Seppälä, J., Heinonen, T., Pukkala, T., Kilpeläinen, A., Mattila, T., Myllyviita, T., Asikainen, A., Peltola, H.	2019	Journal of Environmental Management	A displacement factor (DF) may be used to describe the efficiency of using wood-based products or fuels instead of fossil-based ones to reduce net greenhouse gas (GHG) emissions. However, the DFs of individual products and their production volumes could not be used alone to evaluate the climate impacts of forest utilization. For this reason, in this study we have developed a methodology to assess…	3	100a (2016-2116)	Finland	Living biomass, soil organic matter	Monsu	No	No	No	No
41	Climate mitigation forestry—temporal trade-offs	Skytt et al.	2021	Environmental research letters	The 1.5 ◦C target for global warming calls for evaluating short-term (30–50 years) climate change mitigation with different forests usage. In the current scientific literature and in the public debate, there are contrasting views on how forests should be managed to maximize total climate benefit, including the use of products and changes in carbon pools. Three major factors influence the conclusi…	5	155a	Sweden	Living and dead trees, soil	Heureka	No	No	No	No
42	Quantifying the biophysical climate change mitigation potential of Canada’s forest sector	Smyth et al.	2014	Biogeosciences	The potential of forests and the forest sector to mitigate greenhouse gas (GHG) emissions is widely recognized, but challenging to quantify at a national scale. Forests and their carbon (C) sequestration potential are affected by management practices, where wood harvesting transfers C out of the forest into products, and subsequent regrowth allows further C sequestration. Here we determine the mi…	7	2015-2050	Canada	10 biomass pools (hardwood and softwood versions of merchantable stem wood, foliage, coarse roots, fine roots, and “other”, which includes branches and nonmerchantable-sized trees), C stocks in 11 dead organic matter pools (which include woody litter, the soil organic horizon and mineral soil), and emissions of carbon dioxide (CO2), methane (CH4), carbon monoxide (CO) from slash burning and wildf…	Carbon Budget Model of the Canadian Forest Sector (CBM-CFS3)	Yes, in two scenario comparisons (BAU-int: bioenergy CT commercial thinning for bioenergy feedstock, BAU-int: bioenergy PCT pre-commercial thinning for bioenergy feedstock)	Yes	No	No
43	On the trade-offs and synergies between forest carbon sequestration and substitution	Soimakallio et al.	2021	Mitigation and Adaptation Strategies for Global Change (in press)	Forest biomass can be used in two different ways to limit the growth of the atmospheric greenhouse gas (GHG) concentrations: (1) to provide negative emissions through sequestration of carbon into forests and harvested wood products or (2) to avoid GHG emissions through substitution of non-renewable raw materials with wood. We study the trade-offs and synergies between these strategies using three…	3	30 years	Finland	Living trees, litter and deadwood, soil organic carbon	MELA	No	No	No	No
44	Effects of wood harvesting and utilisation policies on the carbon balance of forestry under changing climate: a Finnish case study	Zubizarreta-Gerendiai et al.	2016	Forest policy and Economics	We studied the effects of different wood harvesting and utilisation policies on the carbon balance and economic profitability of forestry under the current and changing climate (A1B climate scenario). Sixty-year carbon balance was calculated for two Finnish boreal case study areas, one dominated by Scots pine and the other by Norway spruce. Carbon balance included changes in the carbon pools of l…	6	60a	Finland	Living biomass (above- and below-ground), dead organic matter	The Monsu simulation-optimisation tool	Yes, in one scenario comparison (TB1-TB2)	No	No	No

## Sheet: Carbon balance indicators
Study	Data source	Title	scenarios compared	Change in forest C stock	Change in biomass C harvested	Carbon indicator (C/C)	Change in forest C stock	Change in biomass C harvested	Carbon indicator (C/C)	Change in forest C stock	Change in biomass C harvested	Carbon indicator (C/C)
Soimakallio et al. 2016	CBI reported	Climate change mitigation challenge for wood utilization - The case of Finland								100 a	100 a	100 a
			97.5%:le value									1.1
			mean value									0.7
			2.5%:ile value									0.4
Gustavsson et al. 2017	Estimated from visual data	Climate change effects of forestry and substitution of carbon-intensive materials and fossil fuels		30a	30a	30a	50a	50a	50a	100 a	100 a	100 a
			BAU-Production	38.3	20.6	-1.85922	112	50.8	-2.20472	123.8	158.2	-0.782554
			BAU-Set aside	179.8	-117.2	1.53413	252	-192.5	1.30909	324.3	-422.7	0.767211
Baskent 2019	Estimated from visual data	Exploring the effects of climate change mitigation scenarios on timber, water, biodiversity and carbon values: A case study in Pozantı planning unit, Turkey		20a	20a	20a	50a	50a	50a	80a	80a	80a
			BAU-LIM	-2.12	-0.27	-7.85185	-1.03	-0.37	-2.78378	1.5	-1.995	0.75188
			BAU-HIM	-0.1	-0.375	-0.266667	0.3	0.51	-0.588235	7.7	-0.435	17.7011
Jandl 2018	Estimated from visual data	Future management options for cembran pine forests close to the alpine timberline					50a	50a	50a	100 a	100 a	100 a
			Extensive-Intensive (A1B: +5C)				-226.6	168.1	1.34801	-108.5	69.3	1.56566
			Extensive-Intensive (B1: +3C)				-216.5	142.9	1.51505	-89.3	48.8	1.82992
Diaz 2018	Estimated from visual data	Tradeoffs in Timber, Carbon, and Cash Flow under Alternative Management Systems for Douglas-Fir in the Pacific Northwest		20a	20a	20a	50	50	50	95a	95a	95a
			BAU-Short FSC	39.39	-19.33	2.03777	95.18	-47.57	2.00084	103.8	-81.76	1.26957
			BAU-Long FPA	2.93	-4.46	0.656951	119.49	-38.65	3.09159	29.15	-47.57	0.612781
			BAU-Long FSC	17.92	-11.89	1.50715	135.71	-59.46	2.28237	59.74	-86.22	0.692879
Helin et al. 2016	CBI reported	Global warming potentials of stemwood used for energy and materials in Southern Finland: differentiation of impacts based on type of harvest and product lifetime.		20a		20a	50a	50a	50a	100a	100a	100a
			Final felling-no harvest			1.63			1.32			0.22
			1st thinning -no harvest			0.93			0.69			0.29
			2nd thinning-no harvest			1			0.82			0.45
Soimakallio et a. 2021	CBI reported	On the trade-offs and synergies between forest carbon sequestration and substitution		30a	30a	30a
			BAU-POL (2,5%:ile)			0.8
			BAU-POL (mean value)			1.7
			BAU-POL (97.5%:ile)			2.5
			BAU-MSY (2,5%:ile)			1.6
			BAU-MSY (mean value)			2.2
			BAU-MSY (97.5%:ile)			2.8
K Pingoud, T Ekholm, S Soimakallio, T Helin 2016	Estimated from visual data	Carbon balance indicator for forest bioenergy scenarios		20a	20a	20a
			BIO+-BIO- (Low fellings)			1.7
			BIO+-BIO- (Mod fellings)			1.65
Gries et al. 2019	Estimated from visual data	Carbon stocks and timber harvest. Alternative policy approaches for the Great Bear rainforest and their consequences		20a	20a	20a	50a	50a	50a	100a	100a	100a
			Even flow-GBR Order	-9	2.948	3.05292	-7	2.774	2.52343	-11	4.674	2.35344
			Even flow-Scenario A10	-14	5.628	2.48756	-26	10.794	2.40875	-23	13.204	1.7419
			Even flow-Scenario A20	-14	5.14	2.72374	-18	7.134	2.52313	-10	7.932	1.26072
			Even flow-Scenario B10	-14	5.63	2.48668	-26	10.796	2.4083	-23	13.23	1.73847
			Even flow-Scenario B20	-13	5.14	2.52918	-18	7.138	2.52171	-1	3.128	0.319693
Creutzburg et al 2016	Estimated from visual data	Forest management scenarios in a changing climate: trade‐offs between carbon, timber, and old forest					50a	50a	50a	100a	100a	100a
			BAU-Low harvest				6.6	-2.4	2.75	3.9	-4.66	0.83691
			BAU-Ecological forestry				-11.8	-3.7	-3.18919	-24.2	-4.8	-5.04167
			BAU-Accelerated harvest				-30.3	13.6	2.22794	-52.6	26.6	1.97744
Li 2019	Estimated from visual data	Optimal strategies for integrated forest management in megacities combined with wood and carbon services					50a	50a	50a	100a	100a	100a
			No harvest-Low harvest				-15000	7878	1.90404	-20000	18306	1.09254
			No harvest-High harvest				-40000	24047	1.66341	-102500	66047	1.55193
Dong et al.	Data extracted from table and estimated from visual data	Developing alternative forest spatial management plans when carbon and timber values are considered: A real case from northeastern China					50a	50a	50a
			$0-$60				0.03	-0.008	-3.75
			$0-$100				0.16	-0.004	-40
			$0-$200				0.78	0.12	6.5
			$0-$300				1.18	0.256	4.60937
			$0-$400				1.41	0.376	3.75
			$0-$500				1.53	0.46	3.32609
Satir 2018	Estimated from visual data	Scenario analysis using carbon budget modelling for alternative forest management strategies in Turkey: the case study of Arikaya		20a	20a	20a	50a	50a	50a	100a	100a	100a
			B1-B2	-10000	5560	1.79856	-100000	17538	5.7019	-290000	95410	3.03951
Zubizarreta-Gerendiain 2016a	Estimated from visual data	Regional effects of alternative climate change and management scenarios on timber production, economic profitability, and carbon stocks in Norway spruce forests in Finland								90a	90a	90a
			70 base-70 heavy (Current climate, Southern Finland)							-4.20359	-4.04	-1.04049
			70 base-70 light (Current climate, Southern Finland)							8.08383	-0.699719	11.553
			70 base-90 heavy (Current climate, Southern Finland)							9.48503	-6.14369	1.54387
			70 base-90 base (Current climate, Southern Finland)							20.3713	-6.09565	3.34193
			70 base-90 light (Current climate, Southern Finland)							31.5808	-10.7901	2.92685
Bösch 2017	Data extracted from Table 1 and Table 6	Costs and carbon sequestration potential of alternative forest management measures in Germany		20a	20a	20a	35a	35a	35a
			base-1	90.18	-52.76	1.70925	98.33	-65.11	1.51021
			base-2	-117.07	58.95	1.98592	-133.21	66.06	2.0165
			base-3	14.93	-11.68	1.27825	25.34	-20.21	1.25383
			base-4	48.79	-38.96	1.25231	83.26	-67.39	1.23549
Chen et al. 2018	Data extracted from supplementary table	Assessing the greenhouse gas effects of harvested wood products manufactured from managed forests in Canada		20a	20a	20a	50a	50a	50a	100a	100a	100a
			baseline-increased harvest	40.1	28.5	1.40702	59.3	61.1	0.97054	54.6	122.2	0.446809
Härtl et al. 2017	Estimated from visual data	A new way of carbon accounting emphasises the crucial role of sustainable timber use for successful carbon mitigation strategies					30a	30a	30a
			A0-A50				8740286	-26320218	0.332075
			A0-A100				3215966	-7549206	0.426001
			A0-A300				-596611	-2797392	-0.213274
Olguin et al 2018	Estimated from visual data	Applying a systems approach to assess carbon emission reductions from climate change mitigation in Mexico’s forest sector	Applying a systems approach to assess carbon emission reductions from climate change mitigation in Mexico’s forest sector				30a	30a	30a
			BAU -> +50% harvest, +2,7 m3/ha/y growth				-1.10727e+07	6728640	1.64561
Seppälä et al. 2019	Estimated from visual data	Effect of increased wood harvesting and utilization on required greenhouse gas displacement factors of wood-based products and fuels		30a	30a	30a	50a	50a	50a	100a	100a	100a
			BAU-INT1	-124.2	55.2	2.25	-236.7	92	2.57283	-444	184	2.41304
			BAU-INT2	-264.5	114	2.32018	-499.3	190	2.62789	-1110.7	380	2.92289
Baul et al. 2017	Estimated from visual data	Climate Change Mitigation Potential in Boreal Forests: Impacts of Management, Harvest Intensity and Use of Forest Biomass to Substitute Fossil Resources					40a	40a	40a	40a	40a	40a
			T26 -> T26+ (South)							0.133636	-0.137	0.975448
			T26 -> T26- (South)							-0.149182	0.059	2.52851
			T26 -> T26+ (West)							0.149455	-0.153	0.976827
			T26 -> T26- (West)							-0.184636	0.077	2.39787
			T26 -> T26+ (East)							0.119455	-0.144	0.829545
			T26 -> T26- (East)							-0.186545	0.06	3.10909
Pukkala 2018	Estimated from visual data	Carbon forestry is suprising		20a	20a	20a	50a	50a	50a	100a	100a	100a
			Max NPV-Max C bal	15	-10	1.5	86	-41.1	2.09246	225	-92.7	2.42718
			Max NPV-Max C, 1% discounting	31	-16.1	1.92547	106	-36.3	2.92011	231	-103	2.24272
			Max NPV-Max C, 3% discounting	41	-19.5	2.10256	114	-33.4	3.41317	223	-108.7	2.05152
Knauf 2015	Data extracted from Table 2 and Table 4	Modeling the CO 2-effects of forest management and wood usage on a regional basis
										90a	90a	90a
			Carbon storage-max value							-1.51	1.36	1.11029
			Carbon storage-max volume							-0.9	1.58	0.56962
Krause 2020	Data extracted from tables and estimated from visual data	A regional assessment of land‐based carbon mitigation potentials: Bioenergy, BECCS, reforestation, and forest management								80a	80a	80a
			BAU-No harvest									1.1
Zubizarreta-Gerendiai et al. 2016b	Estimated from visual data	Effects of wood harvesting and utilisation policies on the carbon balance of forestry under changing climate: a Finnish case study					60a	60a	60a
			TB1-TB2 (current climate, pine)				0.0236529	0.0129914	-1.82066
			TB1-TB3 (current climate, pine)				0.359049	-0.0724523	4.95566
			TB1-TA1 (current climate, pine)				0.513544	-0.101885	5.04044
			TB1-TA2 (current climate, pine)				0.488483	-0.147826	3.30446
Böttcher et al. 2008	Estimated from visual data						40a	40a	40a
			BAU-ext				-0.35	-0.85	0.411765
			BAU-int				0.45	0.97	0.463918
			BAU-no harvest				-2	-2.1	0.952381
Heinonen et al. 2017	Estimated from visual data	Scenario analyses for the effects of harvesting intensity on development of forest resources, timber supply, carbon balance and biodiversity of Finnish forestry		20a	20a	20a	40a	40a	40a	90a	90a	90a
			BAU(S60)-ext(S40)	-3.885	-5	0.777	-5.4325	-5	1.0865	-6.18889	-5	1.23778
			BAU(S60)-int(S80)	3.79	5	0.758	5.9475	5	1.1895		5
			BAU(S60)-int(S100)	8.185	10	0.8185		10			10
			BAU(S60)-int(SUS max sustainable harvest)	3.775	3.25	1.16154	5.335	3.25	1.64154	7.03556	3.25	2.16479
Holtsmark 2012	Data extracted from table and estimated from visual data	Harvesting in boreal forests and the biofuel carbon debt		95a	95a	95a
			BAU-int	3.16	2.6	1.22
Pilli et al. 2017	Supplementary information	The European forest sector: past and future carbon budget and fluxes under different management scenarios		30a	30a	30a
			BAU-int			0.4
			BAU-ext			2.6
Pukkala 2017	Estimated from visual data	Does management improve the carbon balance of forestry?		20a	20a	20a	50a	50a	50a	100a	100a	100a
			no harvest-> 2,7m3 ha-1 y-1	-20	10.86	1.84162	-60	27.16	2.20913	-113	54.31	2.08065
Seidl et al. 2007	Data extracted from table and estimated from visual data	Assessing trade-offs between carbon sequestration and timber production within a framework of multi-purpose forestry in Austria		100a	100a	100a
			MS1 -> MS2	54	-26	2.07692
			MS1 -> MS3	15.4	-10	1.54
			MS1 -> MS4	161.8	-212	0.763208
Smyth et al. 2014	Estimated from visual data	Quantifying the biophysical climate change mitigation potential of Canada’s forest sector		35a	35a	35a
			BAU-ext(harvest less, reduce harvest levels and restrict harvest area)	-1.11429	-1.41	0.790274
			BAU-int(bioenergy harvest, clear cut harvest for bioenergy feedstock)	1.32468	1.42	0.93287
			BAU-int(bioenergy CT, commercial thinning for bioenergy feedstock)	0.0467532	0.62	0.0754085
			BAU-int(bioenergy PCT, pre-commercial thinning for bioenergy feedstock)	0.677922	0.029	23.3766
Gustavsson 2021	Estimated from visual data	Climate effects of forestry and substitution of concrete buildings and fossil energy		20a	20a	20a	50a	50a	50a	100a	100a	100a
			BAU-set aside	9	-5.6	1.60714	20	-12.7	1.5748	26.8	-29	0.924138
			BAU-production	1.4	-0.8	1.75	6	3	-2	16	22.9	-0.69869
Rüter et al. 2016	Data extracted from tables	ClimWood2030 ‘Climate benefits of material substitution by forest biomass and harvested wood products: Perspective 2030’					20a	20a	20a
			BAU-EXT				-77.1355	-50.85	1.51692
			BAU-INT				7.53818	7.15	1.05429
Ohmichen et al. 2018	Data extracted from tables and estimated from visual data	Die alternativen WEHAM-Szenarien: Holzpräferenz, Naturschutzpräferenz und Trendfortschreibung		30a	30a	30a
			Business as usual - Wood preference	21.6	32	0.675
Böttcher et al. 2018	Data extracted from tables and estimated from visual data			30a	30a	30a
			Basis-Forest vision	17.8	11.4	1.5614
			Basis-Wood	-45.9	-25.1	1.82869
			Basis-no harvest	-114.6	-72.7	1.57634
Mund et al. 2015	Data extracted from tables and estimated from visual data	Klimaschutzwirkung des Wald- und Holzsektors: Schutz- und Nutzungsszenarien für drei Modellregionen in Thüringen		30a	30a	30a
			SILVA use-SILVA protection (Hainich)	-5.4	-6	0.9
			SILVA use-SILVA protection (Hohe-Schrecke)	-4.6	-5.4	0.851852
			SILVA use-SILVA protection (Vessertal)	-12.1	-6.5	1.86154
Gutsch et al. 2018	Data extracted from tables and estimated from visual data	Balancing trade-offs between ecosystem services in Germany’s forests under climate change		35a	35a	35a
			Baseline-Nature protection	-12.1	-13	0.930769
			Baseline-Biomass production	30.1	11.7	2.57265
			Baseline-Nature protection (CC)	-11.8	-13.3	0.887218
			Baseline-Biomass production (CC)	30	11.4	2.63158
Hynynen et al. 2015	Estimated from visual data	Long-term impacts of forest management on biomass supply and forest resource development: a scenario analysis for Finland		20a	20a	20a	50a	50a	50a	100a	100a	100a
			BAU-INT			1.26			1.11			0.73
			BAU-QLT			1.07			0.94			0.69
			BAU-EXT			1.08			1.36			1.32
Leskinen et al. 2020	Estimated from visual data	Russian forests and climate change		20a	20a	20a	40a	40a	40a
			Reference-CSF 1 (Republic of Karelia)	18.3	2.53	-7.2332	54.25	7.35	-7.38095
			Reference-CSF 2 (Republic of Karelia)	3.84	-1.09	3.52294	7.53	-2.6	2.89615
			Reference-CSF 3 (Republic of Karelia)	17.78	2.53	-7.02767	49.81	7.26	-6.86088
				20a	20a	20a	40a	40a	40a
			Reference-CSF (Angara macro district)	35.07	-8.15	4.30307	64.84	-24.9	2.60402
Jevsenak et al. 2020	Estimated from visual data	The Effect of Harvesting on National Forest Carbon Sinks up to 2050 Simulated by the CBM-CFS3 Model: A Case Study from Slovenia		30a	30a	30a
			BAU-PLAN	0.46	0.37	-1.24324
			BAU-LOW	0.68	-0.28	2.42857
			BAU-HIGH	-0.29	0.63	0.460317
			BAU-HAZ	-0.08	0.47	0.170213
Jandl et al. 2018	Estimated from visual data	Strategies for Climate-Smart Forest Management in Austria		30a	30a	30a	60a	60a	60a	90a	90a	90a
			BAU-1a	-0.35	0.58	0.603448	-0.59	0.85	0.694118	-0.53	0.58	0.913793
			BAU-1b	0.05	0.06	-0.833333	-0.48	0.82	0.585366	-0.88	1.5	0.586667
			BAU-1c	-0.04	-0.09	-0.444444	-0.32	0.57	0.561404	-0.74	1.27	0.582677
			BAU-2	2.01	-2.77	0.725632	2.74	-3.3	0.830303	2.73	-3.02	0.903974
Blattert et al. 2020	Estimated from visual data	Long-term impacts of increased timber harvests on ecosystem services and biodiversity: A scenario study based on national forest inventory data		30a	30a	30a	50a	50a	50a	90a	90a	90a
			BAU-Constant	-10.868	10.1847	1.0671	-24.3648	17.9402	1.35811	-54.9837	30.2916	1.81515
			BAU-increment	-7.7059	17.6736	0.436011	-30.1583	25.1541	1.19894	-70.6775	36.2063	1.95207
			BAU-Conifers	-0.225802	36.985	0.00610522	8.32443	56.9297	-0.146223	20.7532	103.577	-0.200364
			BAU-Energy	-6.54265	27.5945	0.2371	-7.64085	37.0823	0.206051	-8.17909	48.4942	0.168661
Skytt et al. 2021	Extracted from supplementary material	Climate mitigation forestry—temporal trade-offs		20a	20a	20a	50a	50a	50a	90a	90a	90a
			80 % harvest-unmanaged (Gävleborg)	4.65258e+07	-3.61636e+07	1.28654	1.22781e+08	-7.81181e+07	1.57174	1.72558e+08	-1.3844e+08	1.24645
			80 % harvest-40 % harvest (Gävleborg)	2.1164e+07	-1.67189e+07	1.26588	5.55964e+07	-3.67382e+07	1.51331	9.21592e+07	-7.15665e+07	1.28774
			80 % harvest-60 % harvest (Gävleborg)	1.06016e+07	-8.22254e+06	1.28933	2.7427e+07	-1.74428e+07	1.5724	5.03847e+07	-3.47489e+07	1.44997
			80 % harvest-95 % harvest (Gävleborg)	-5.613e+06	4.11359e+06	1.3645	-1.4271e+07	7.7968e+06	1.83037	-1.37197e+07	6.89676e+06	1.9893
Pang et al. 2017	Estimated from visual data	Trade-offs and synergies among ecosystem services under different forest management scenarios – The LEcA tool		30a	30a	30a	50a	50a	50a	100a	100a	100a
			EAF-CCF	-0.719332	0.833945	0.862566	-0.685934	0.386652	1.77404	-0.541427	0.351727	1.53934
